# Supplementary material for: Evaluation of direct restorations using the revised FDI criteria: results from a reliability study
Source: Springer Nature journal article supplement (doi:10.1007/s00784-022-04771-9), 2022-11-18

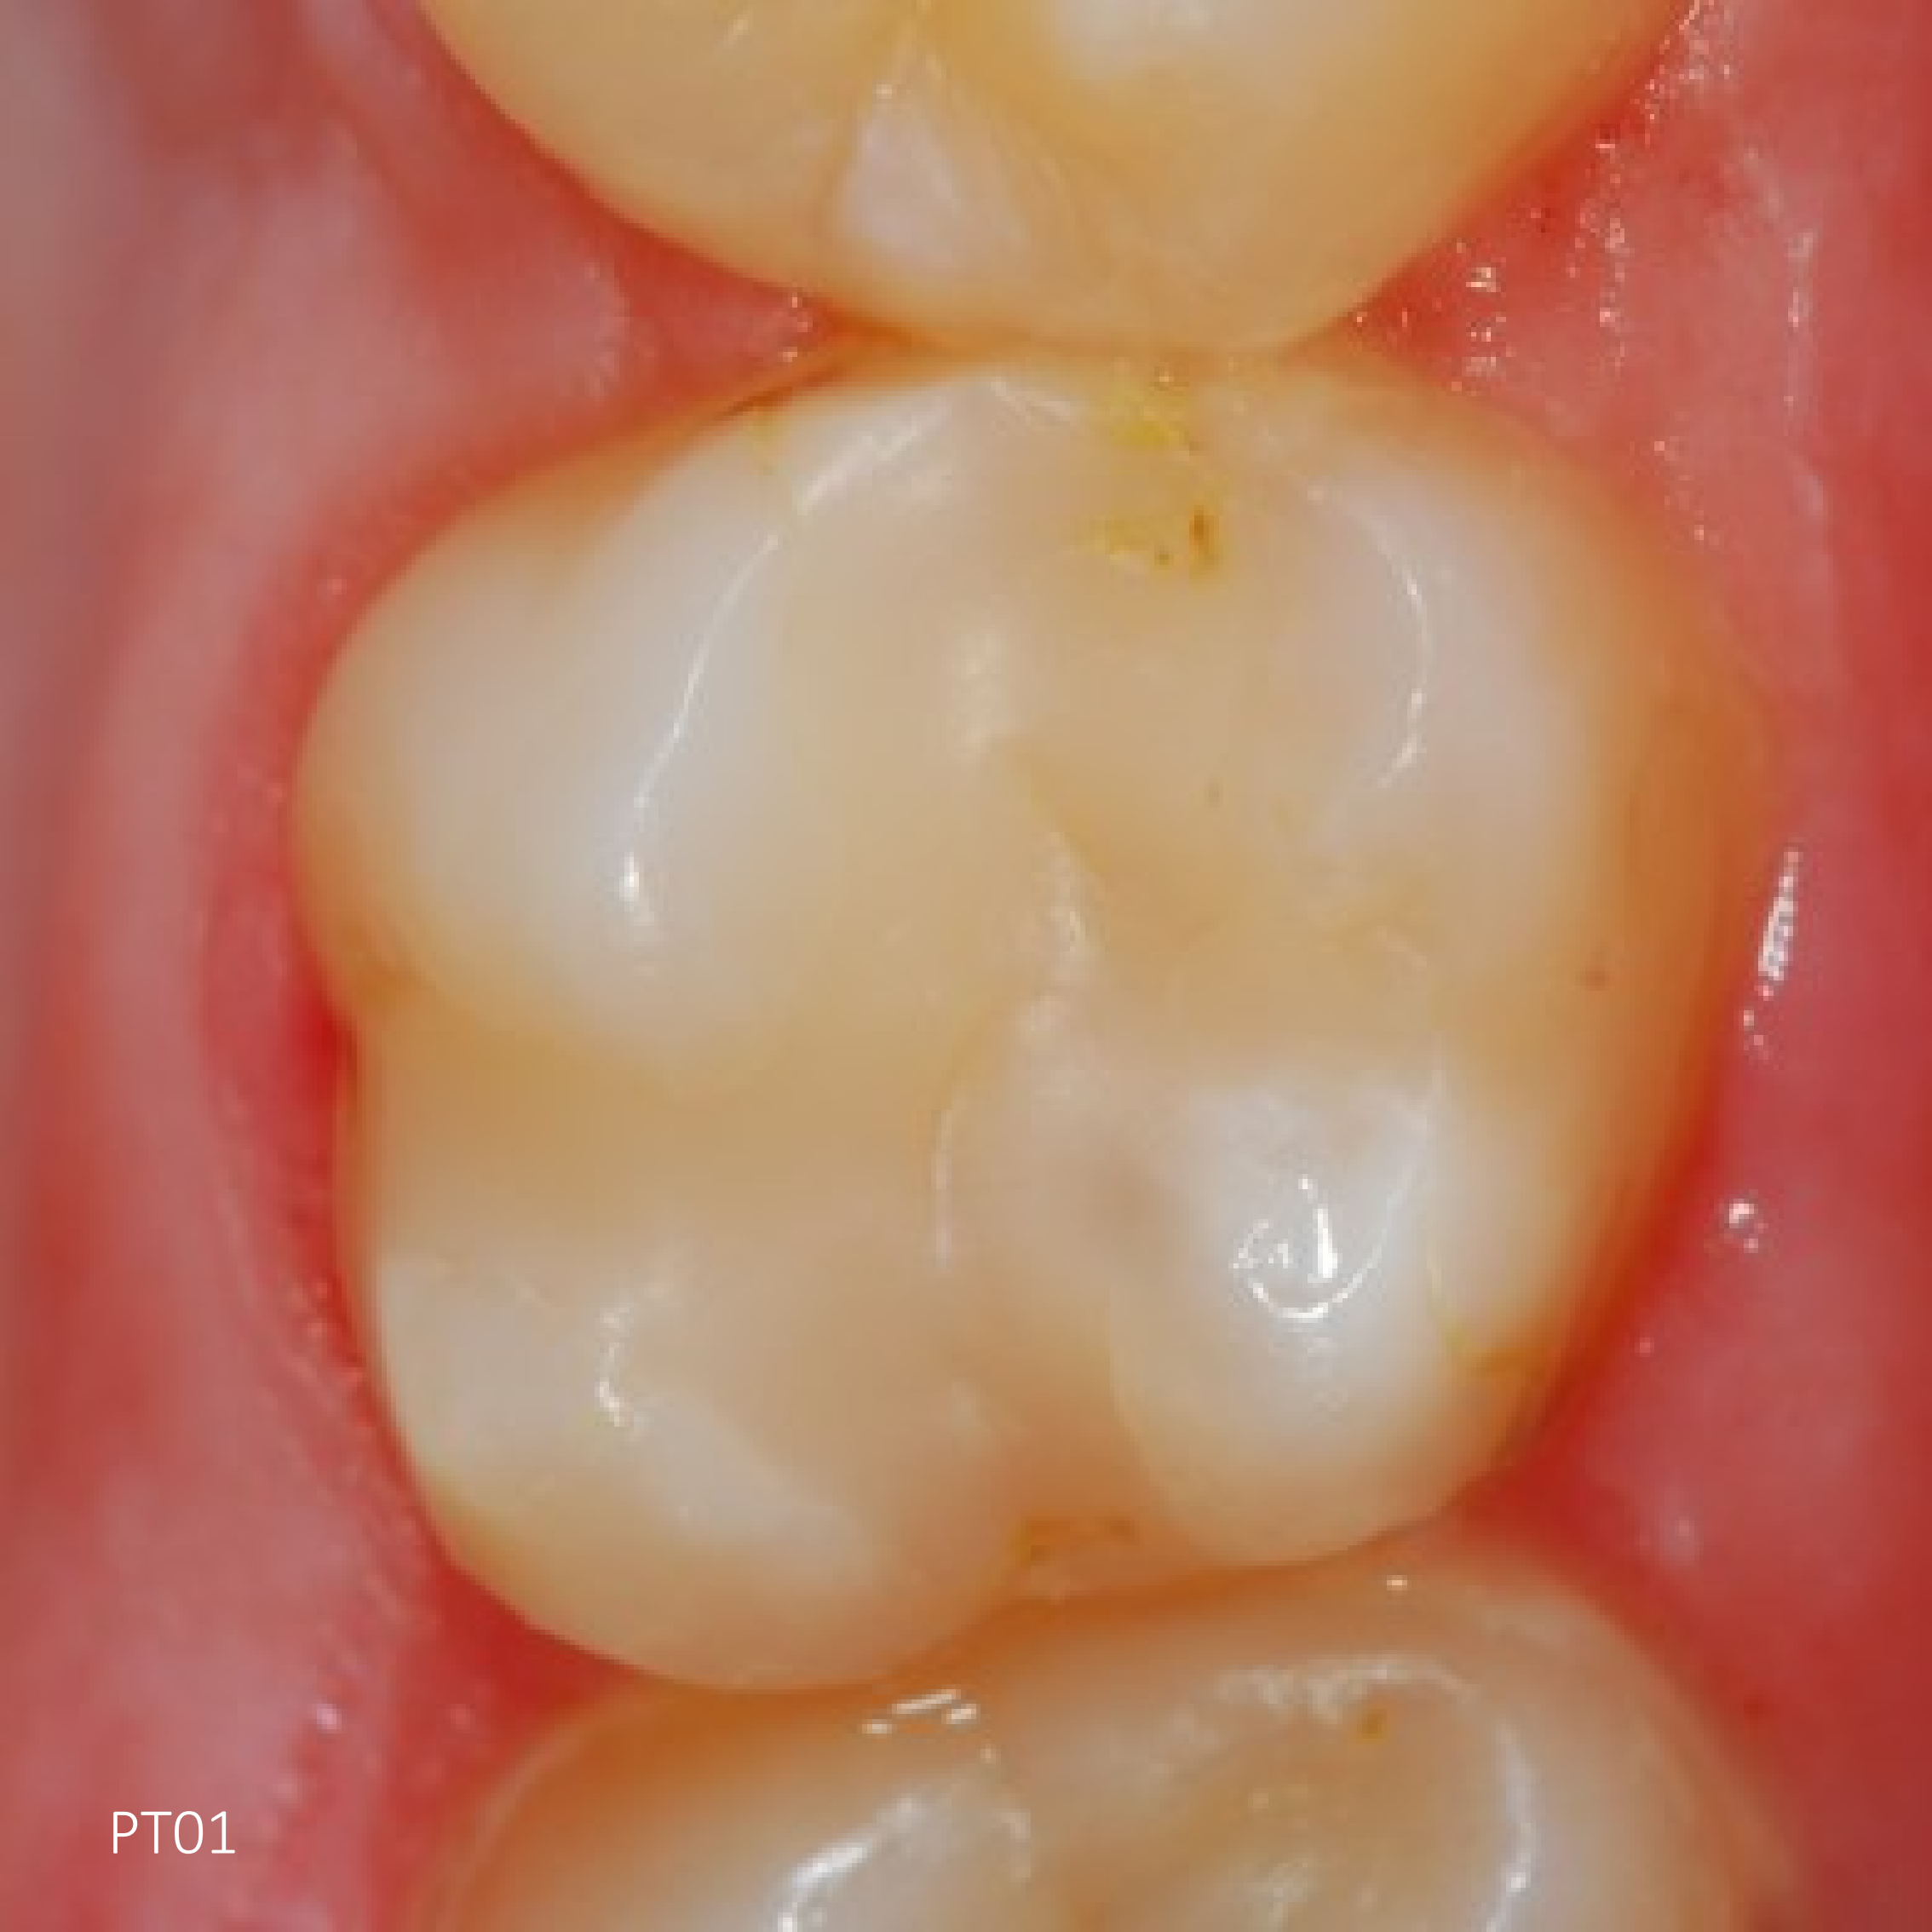

PT01

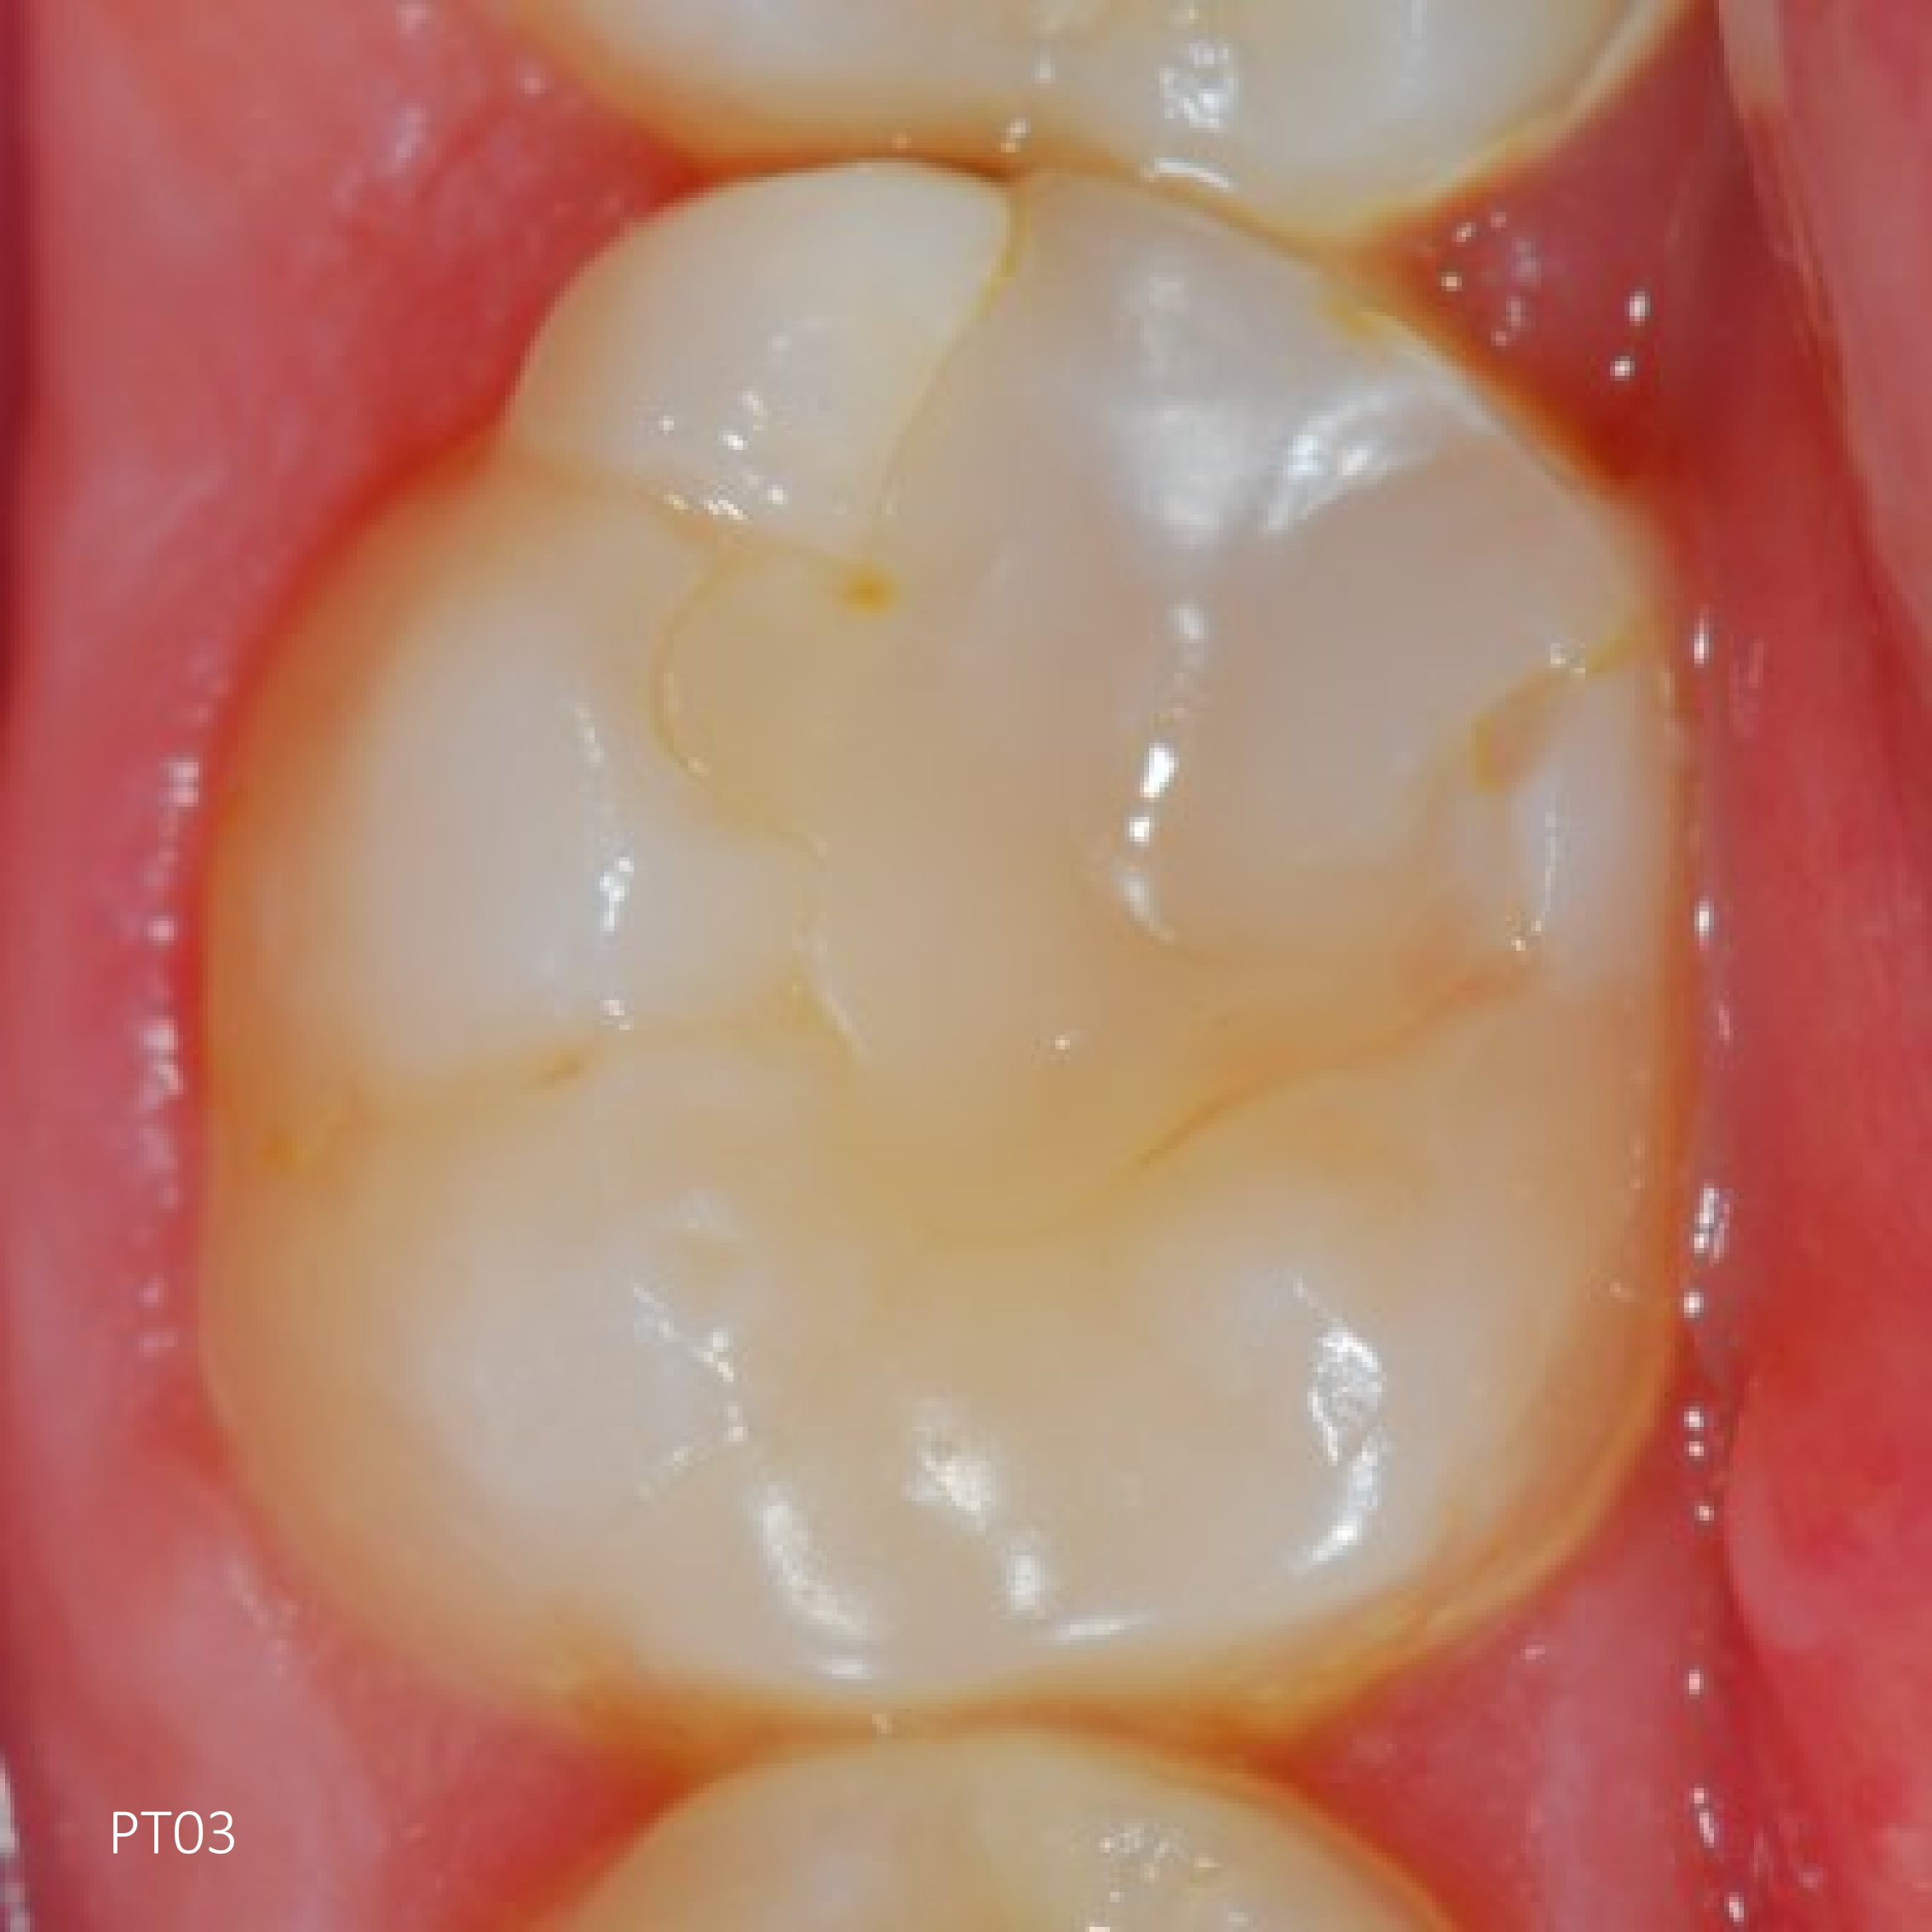

PT03

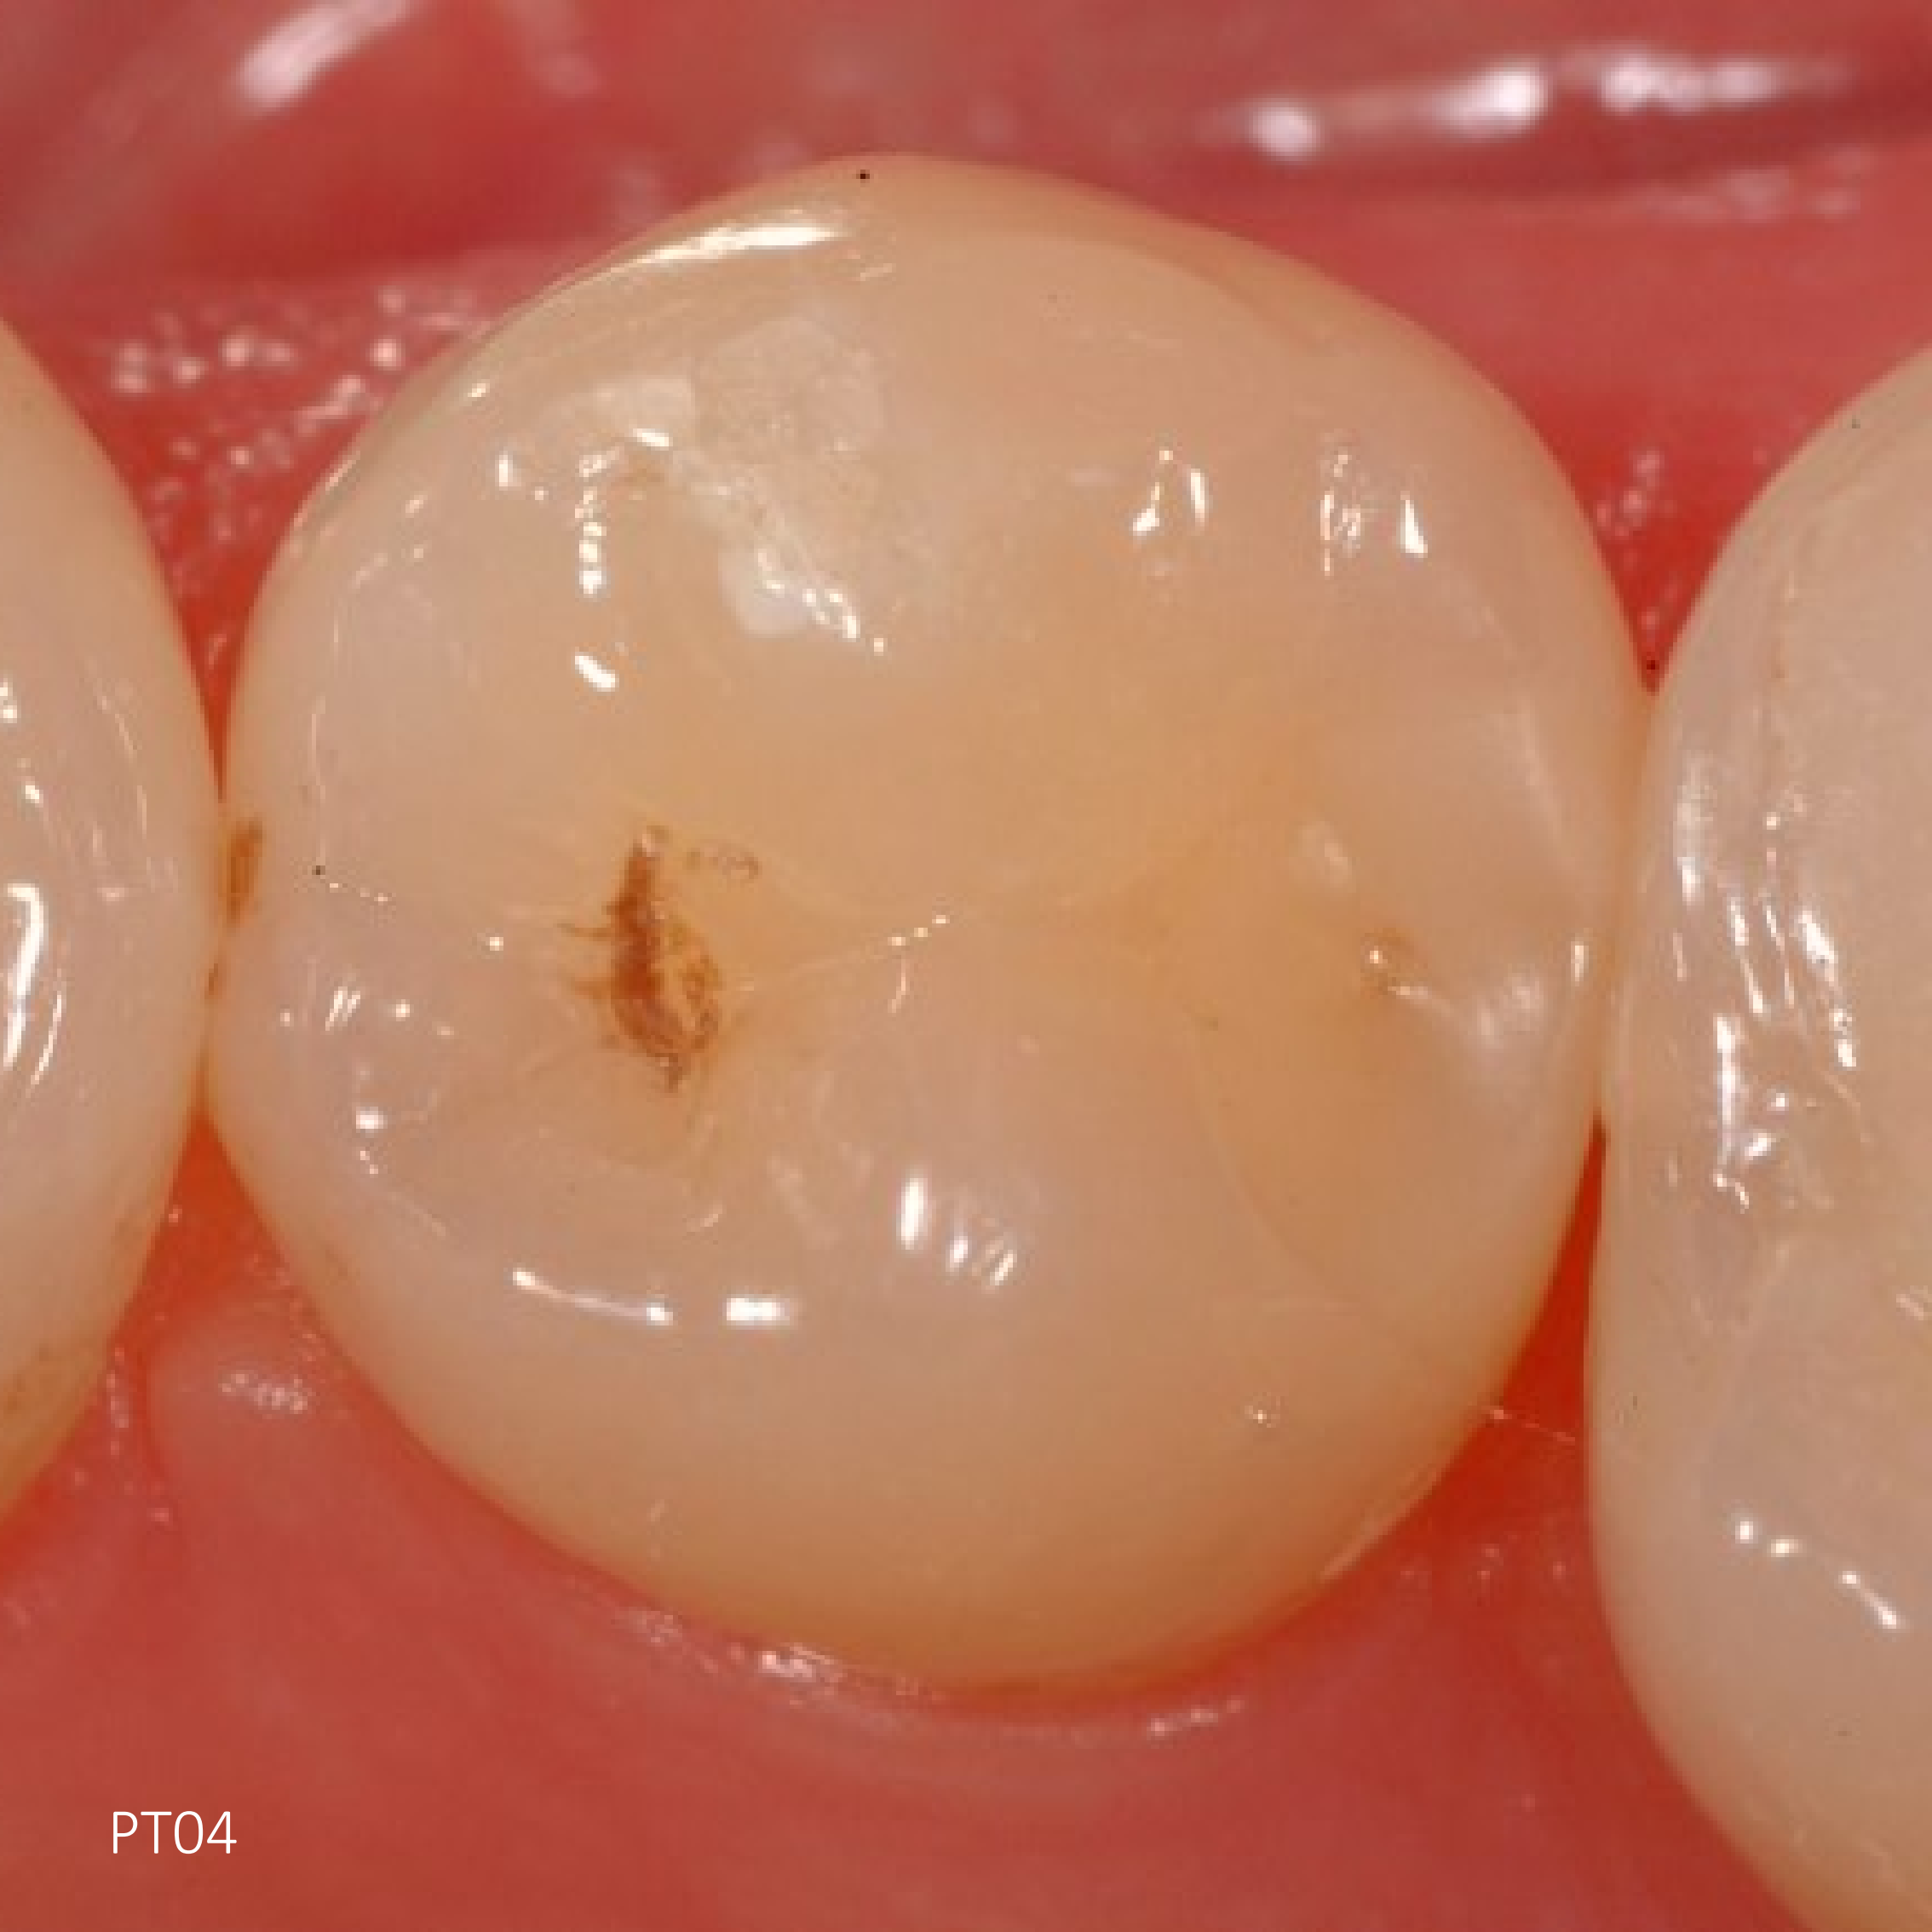

PT04

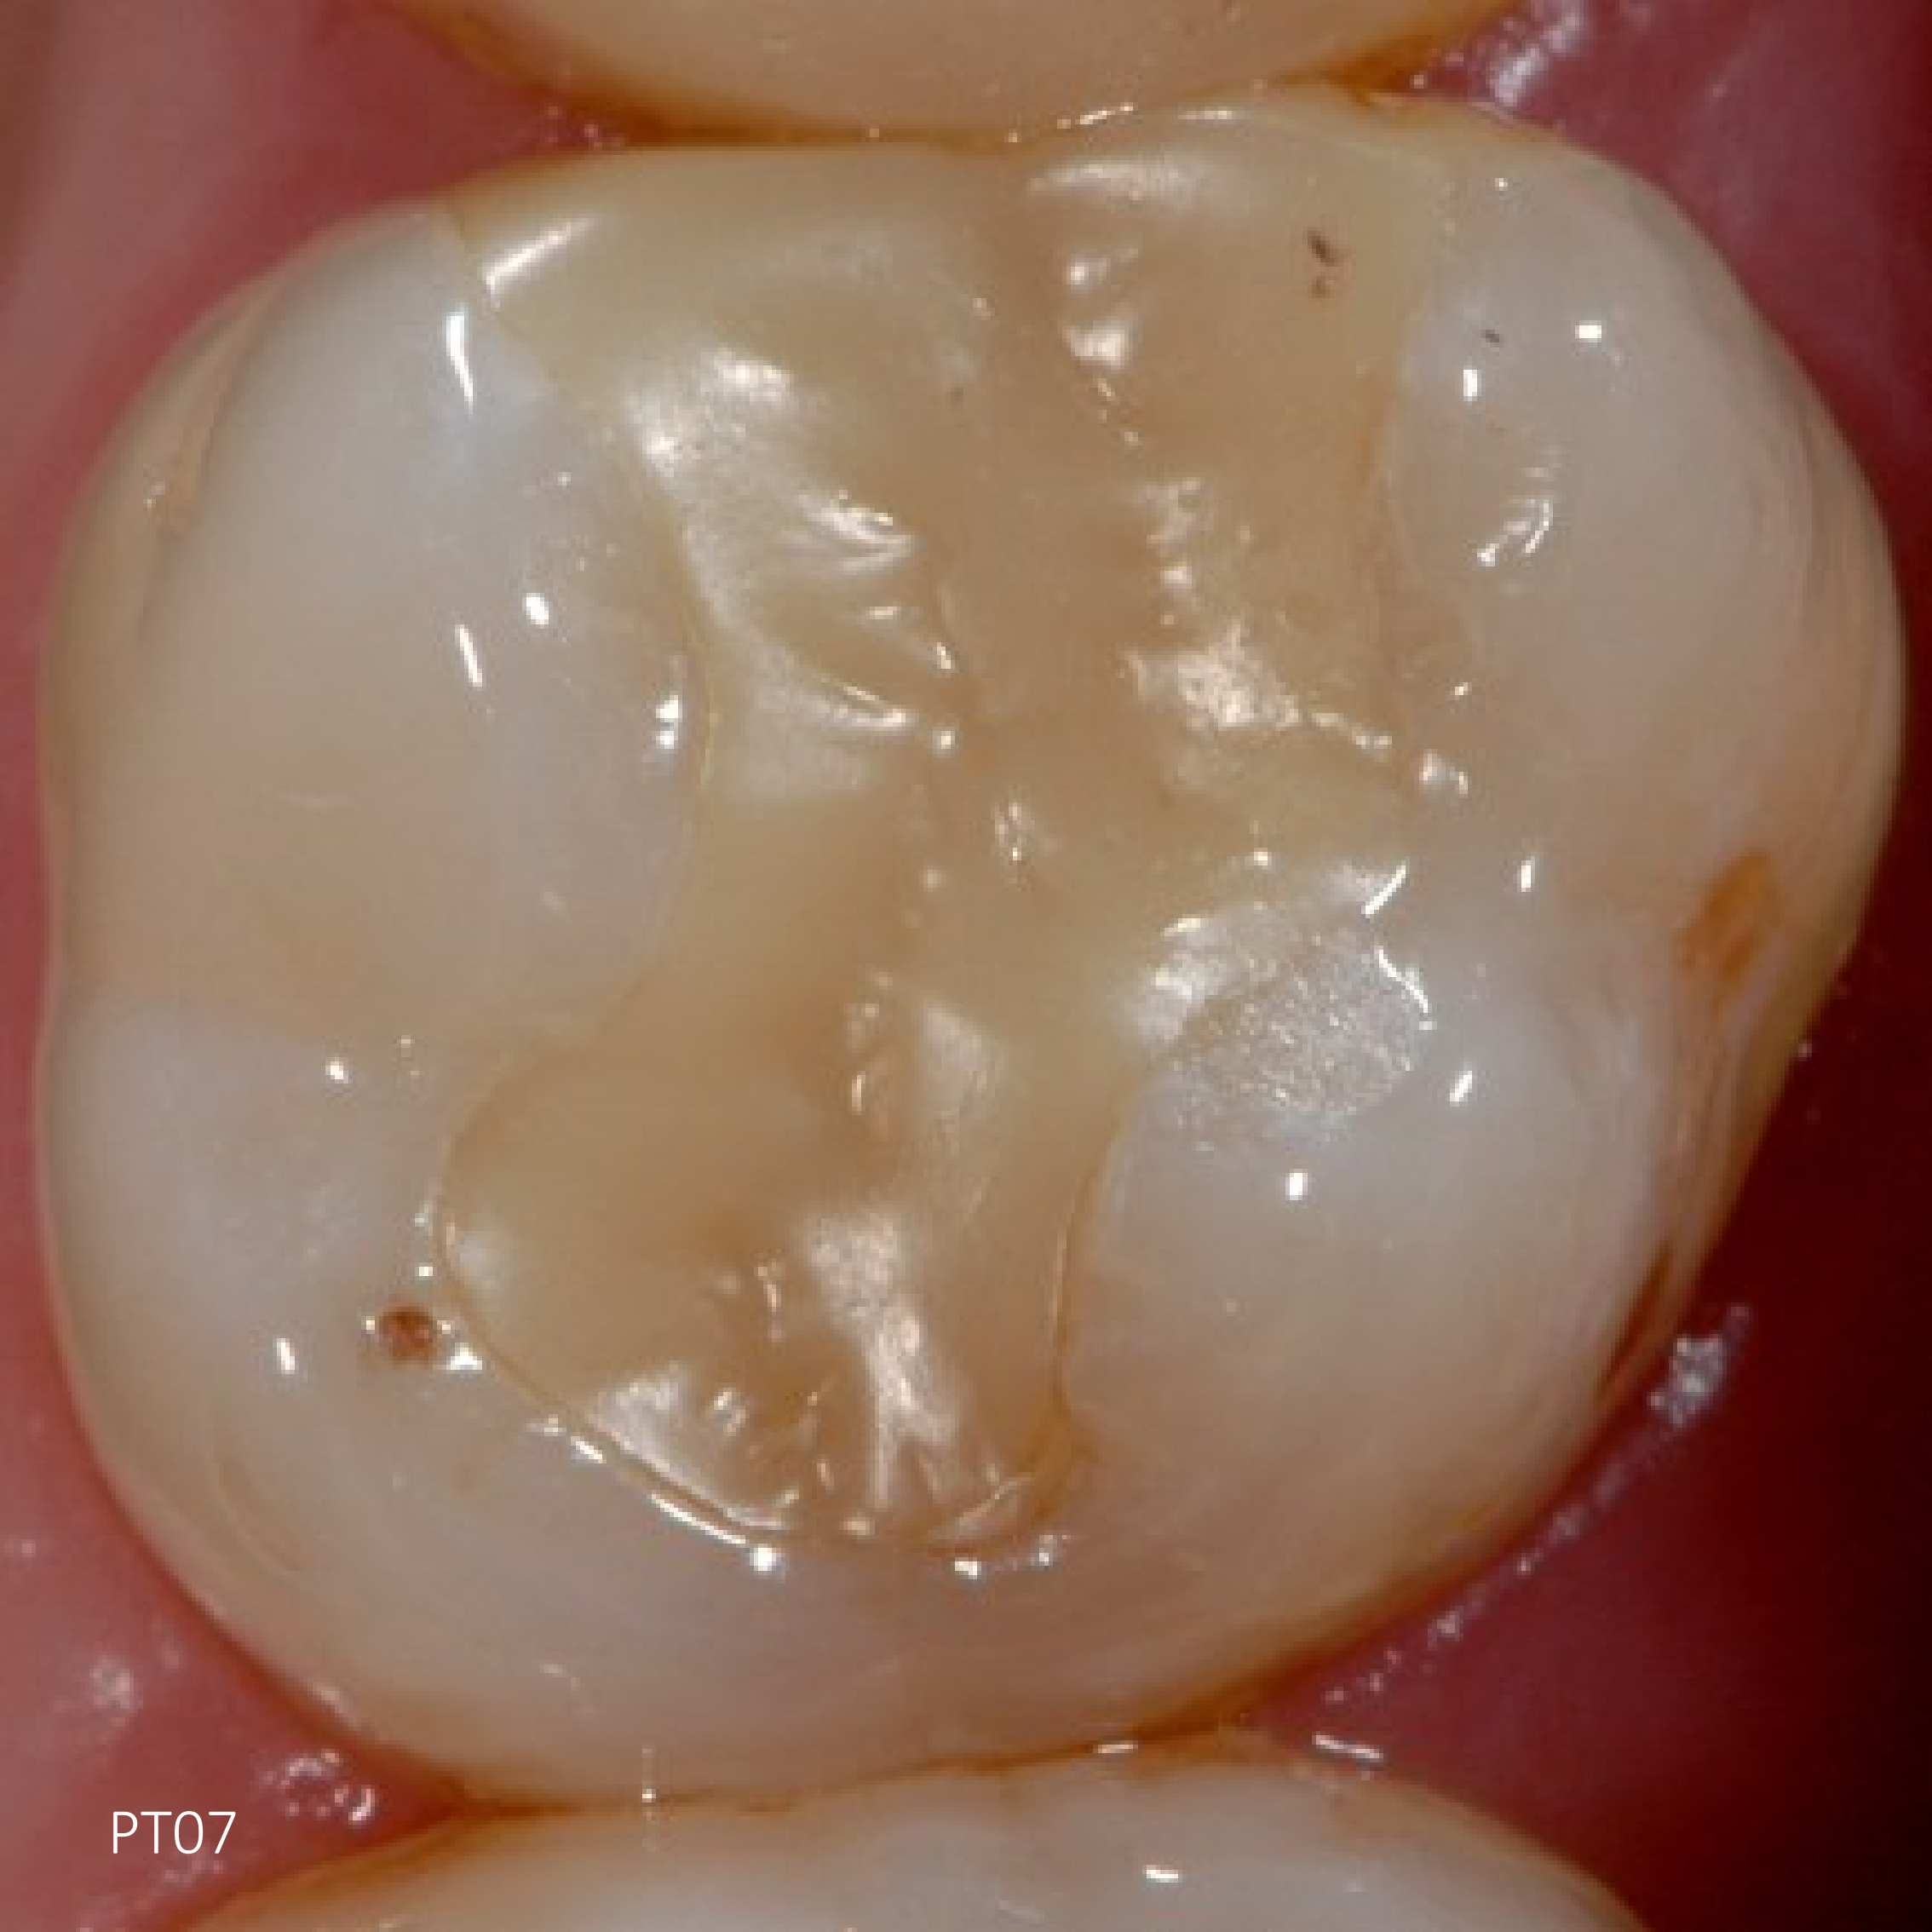

PT07

PT08

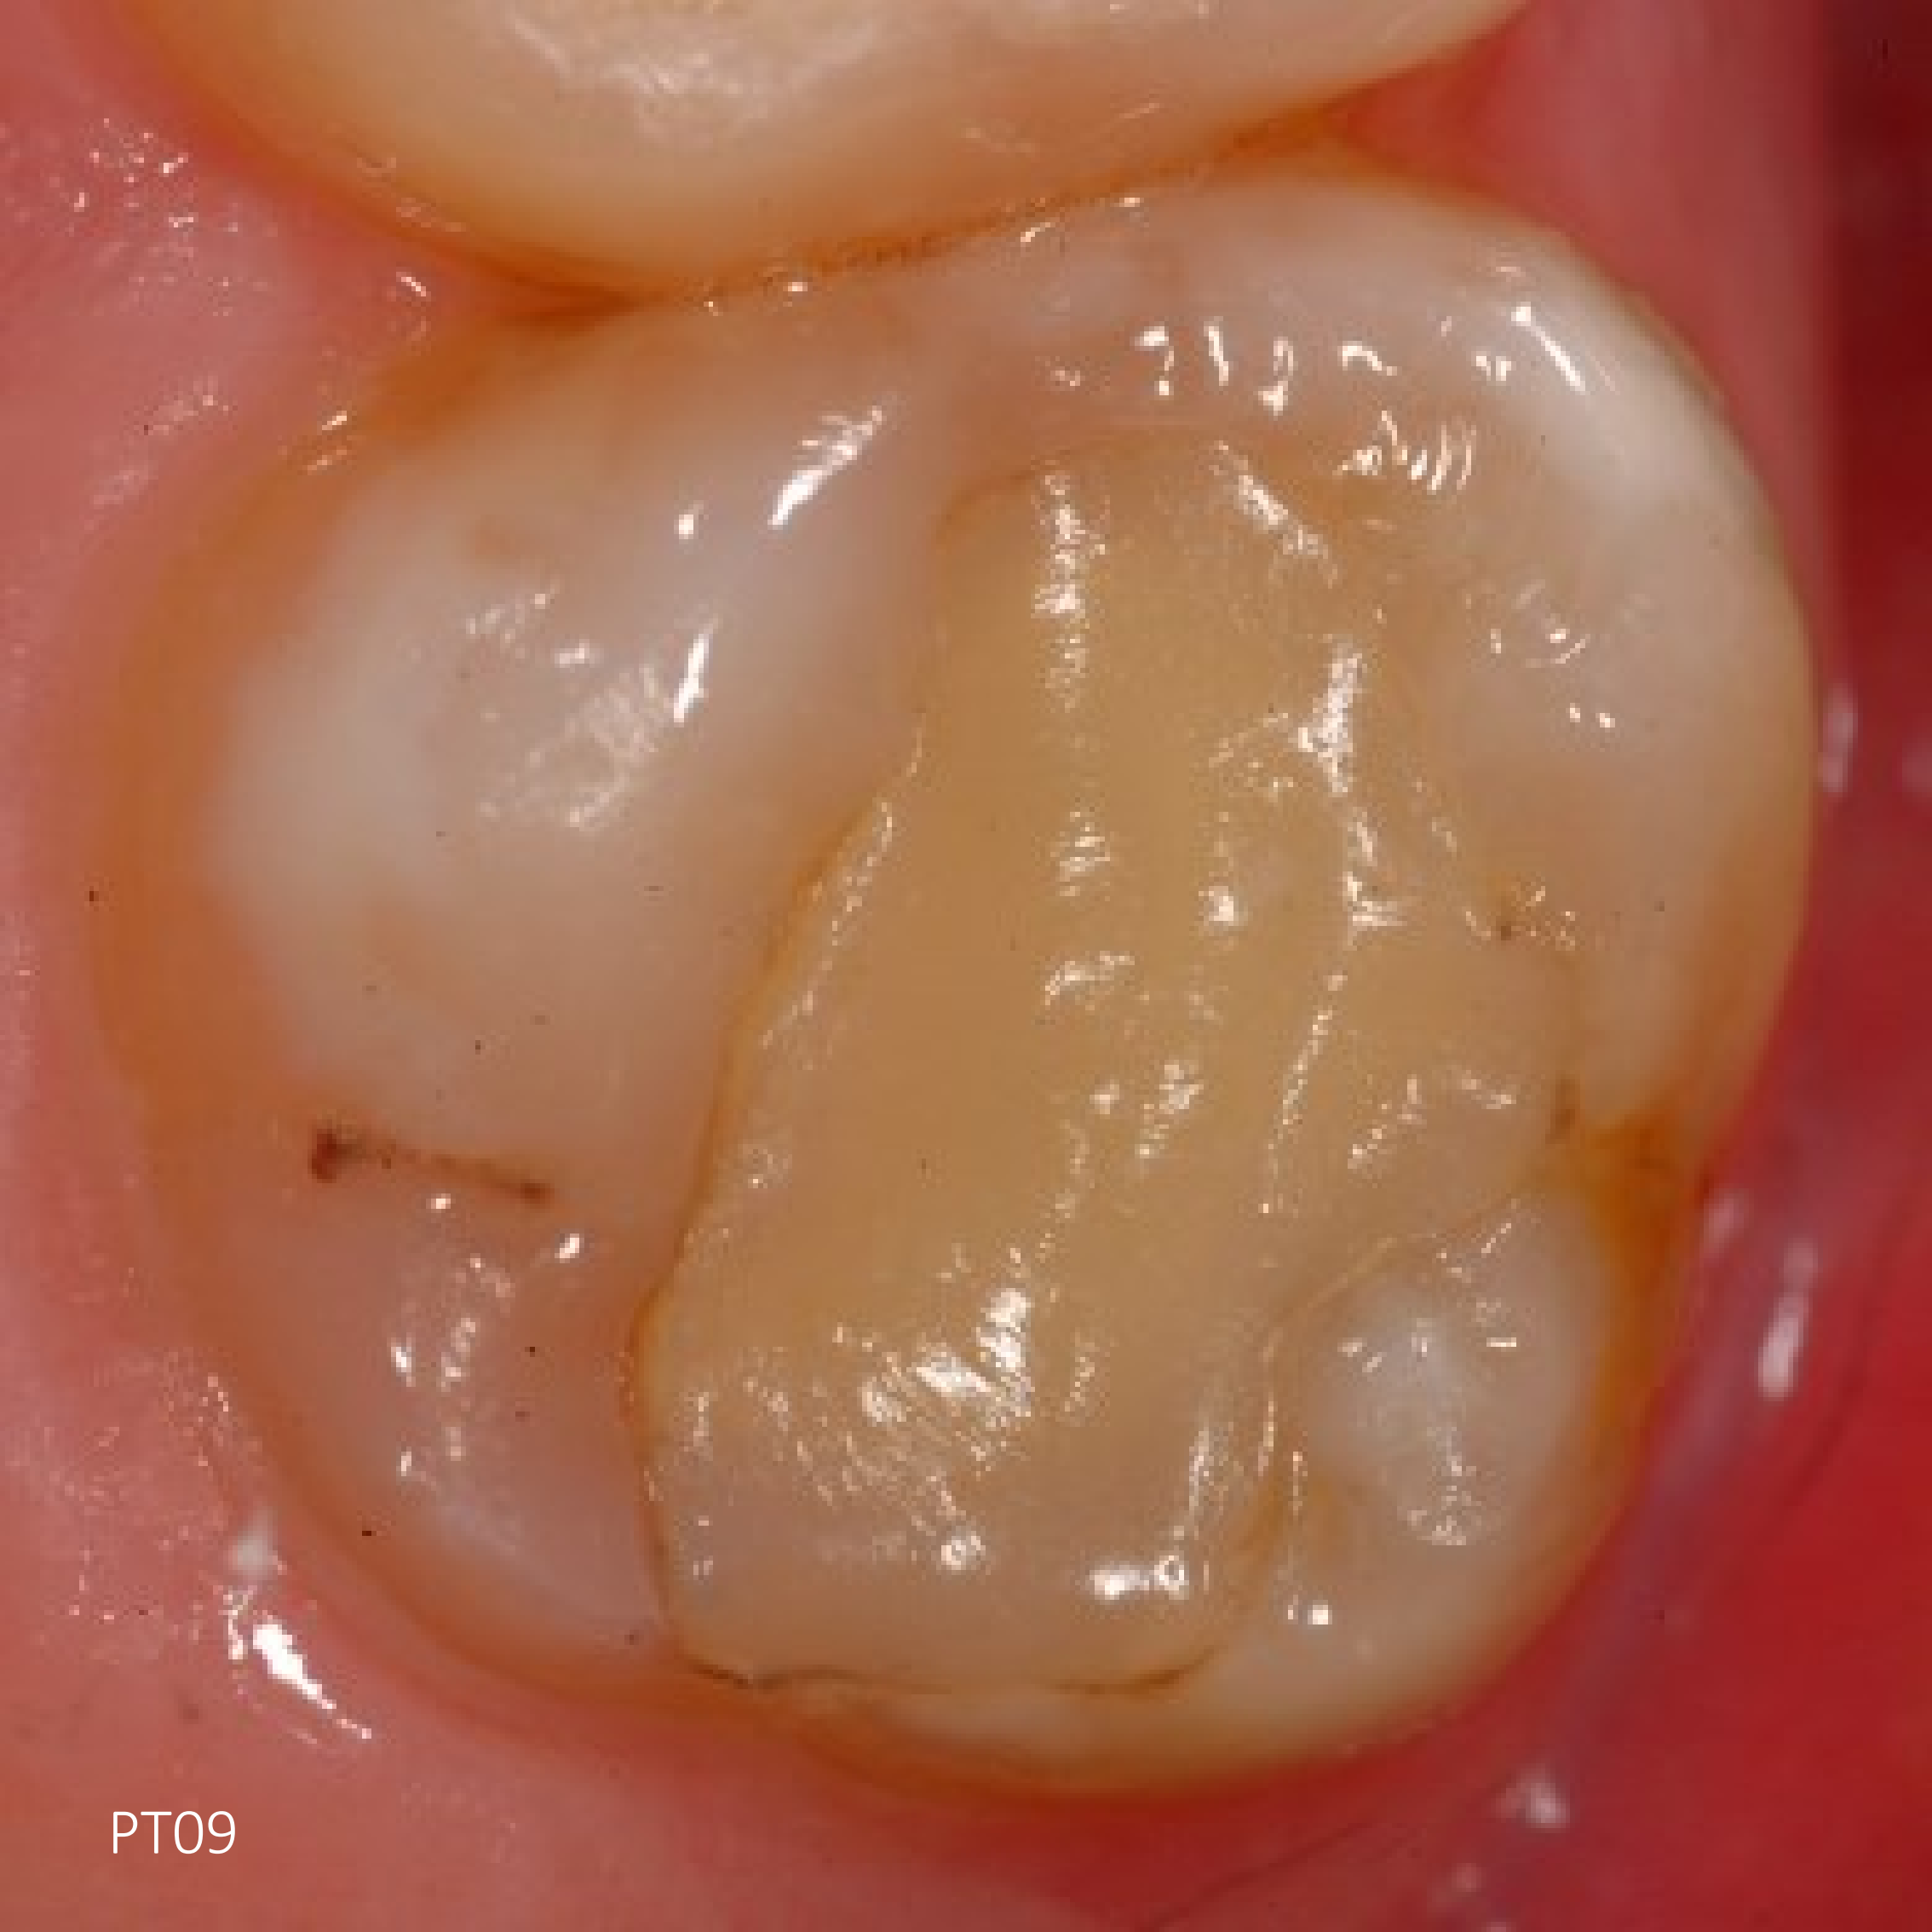

PT09

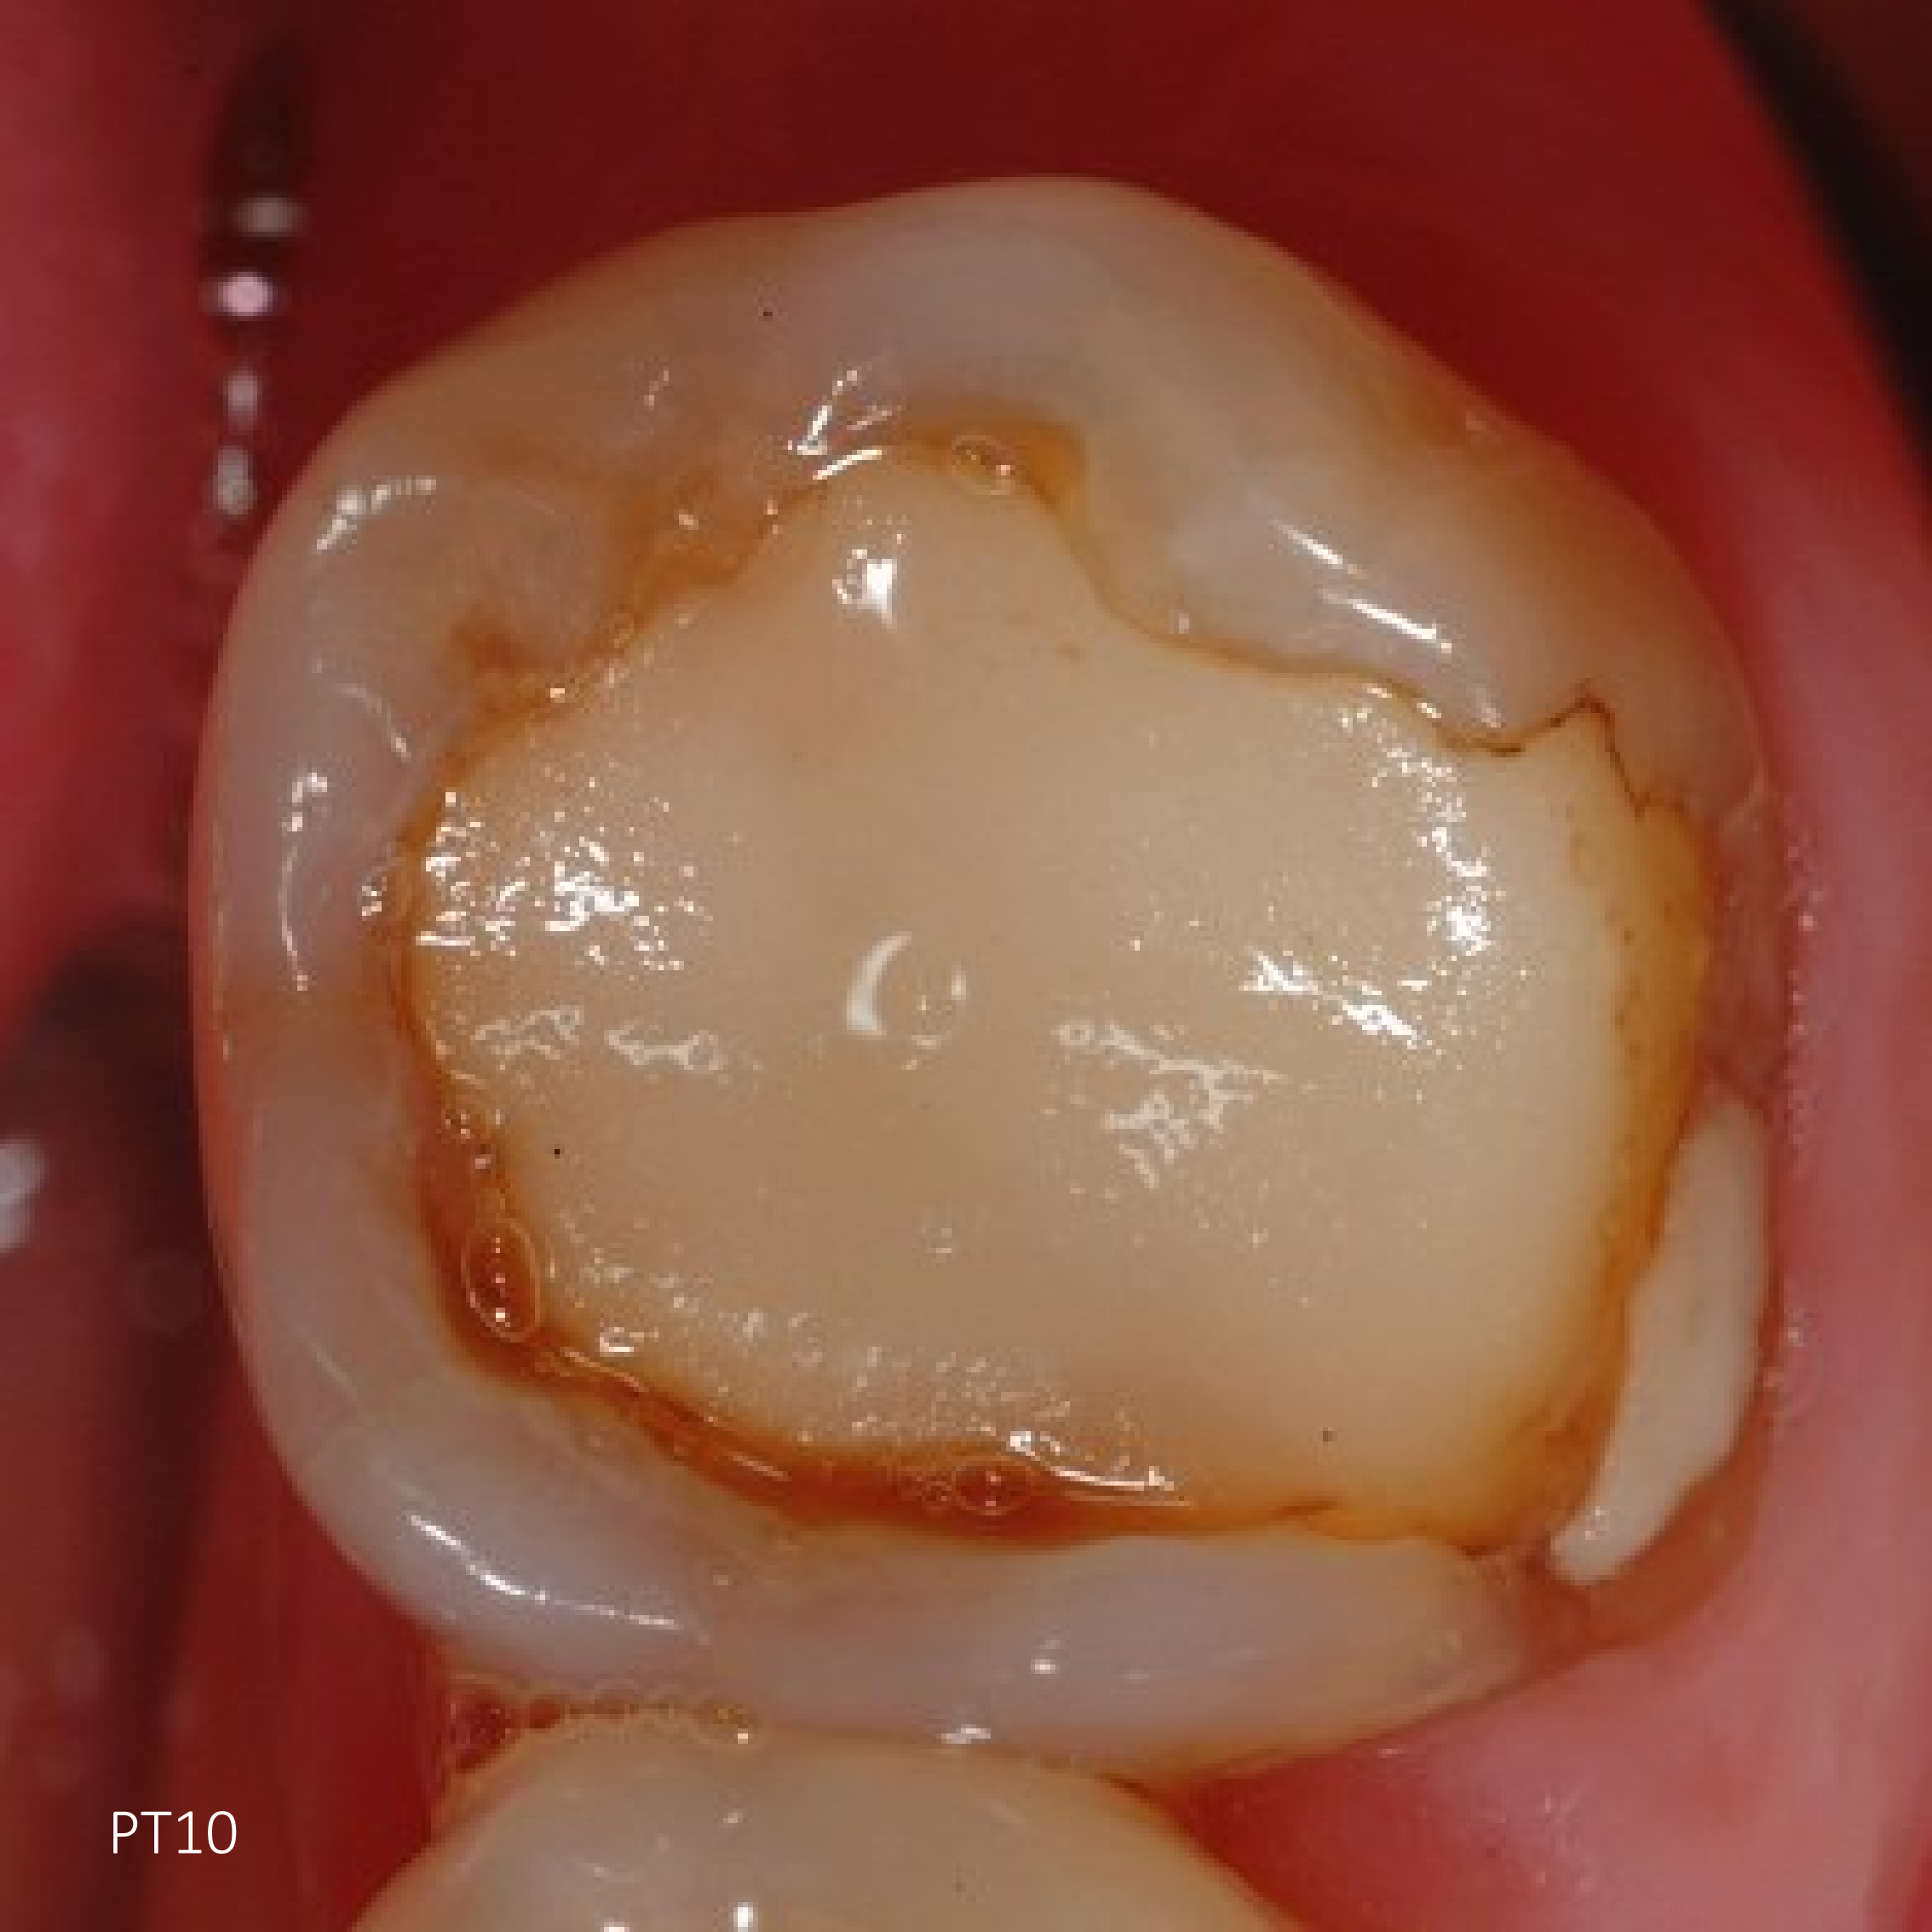

PT10

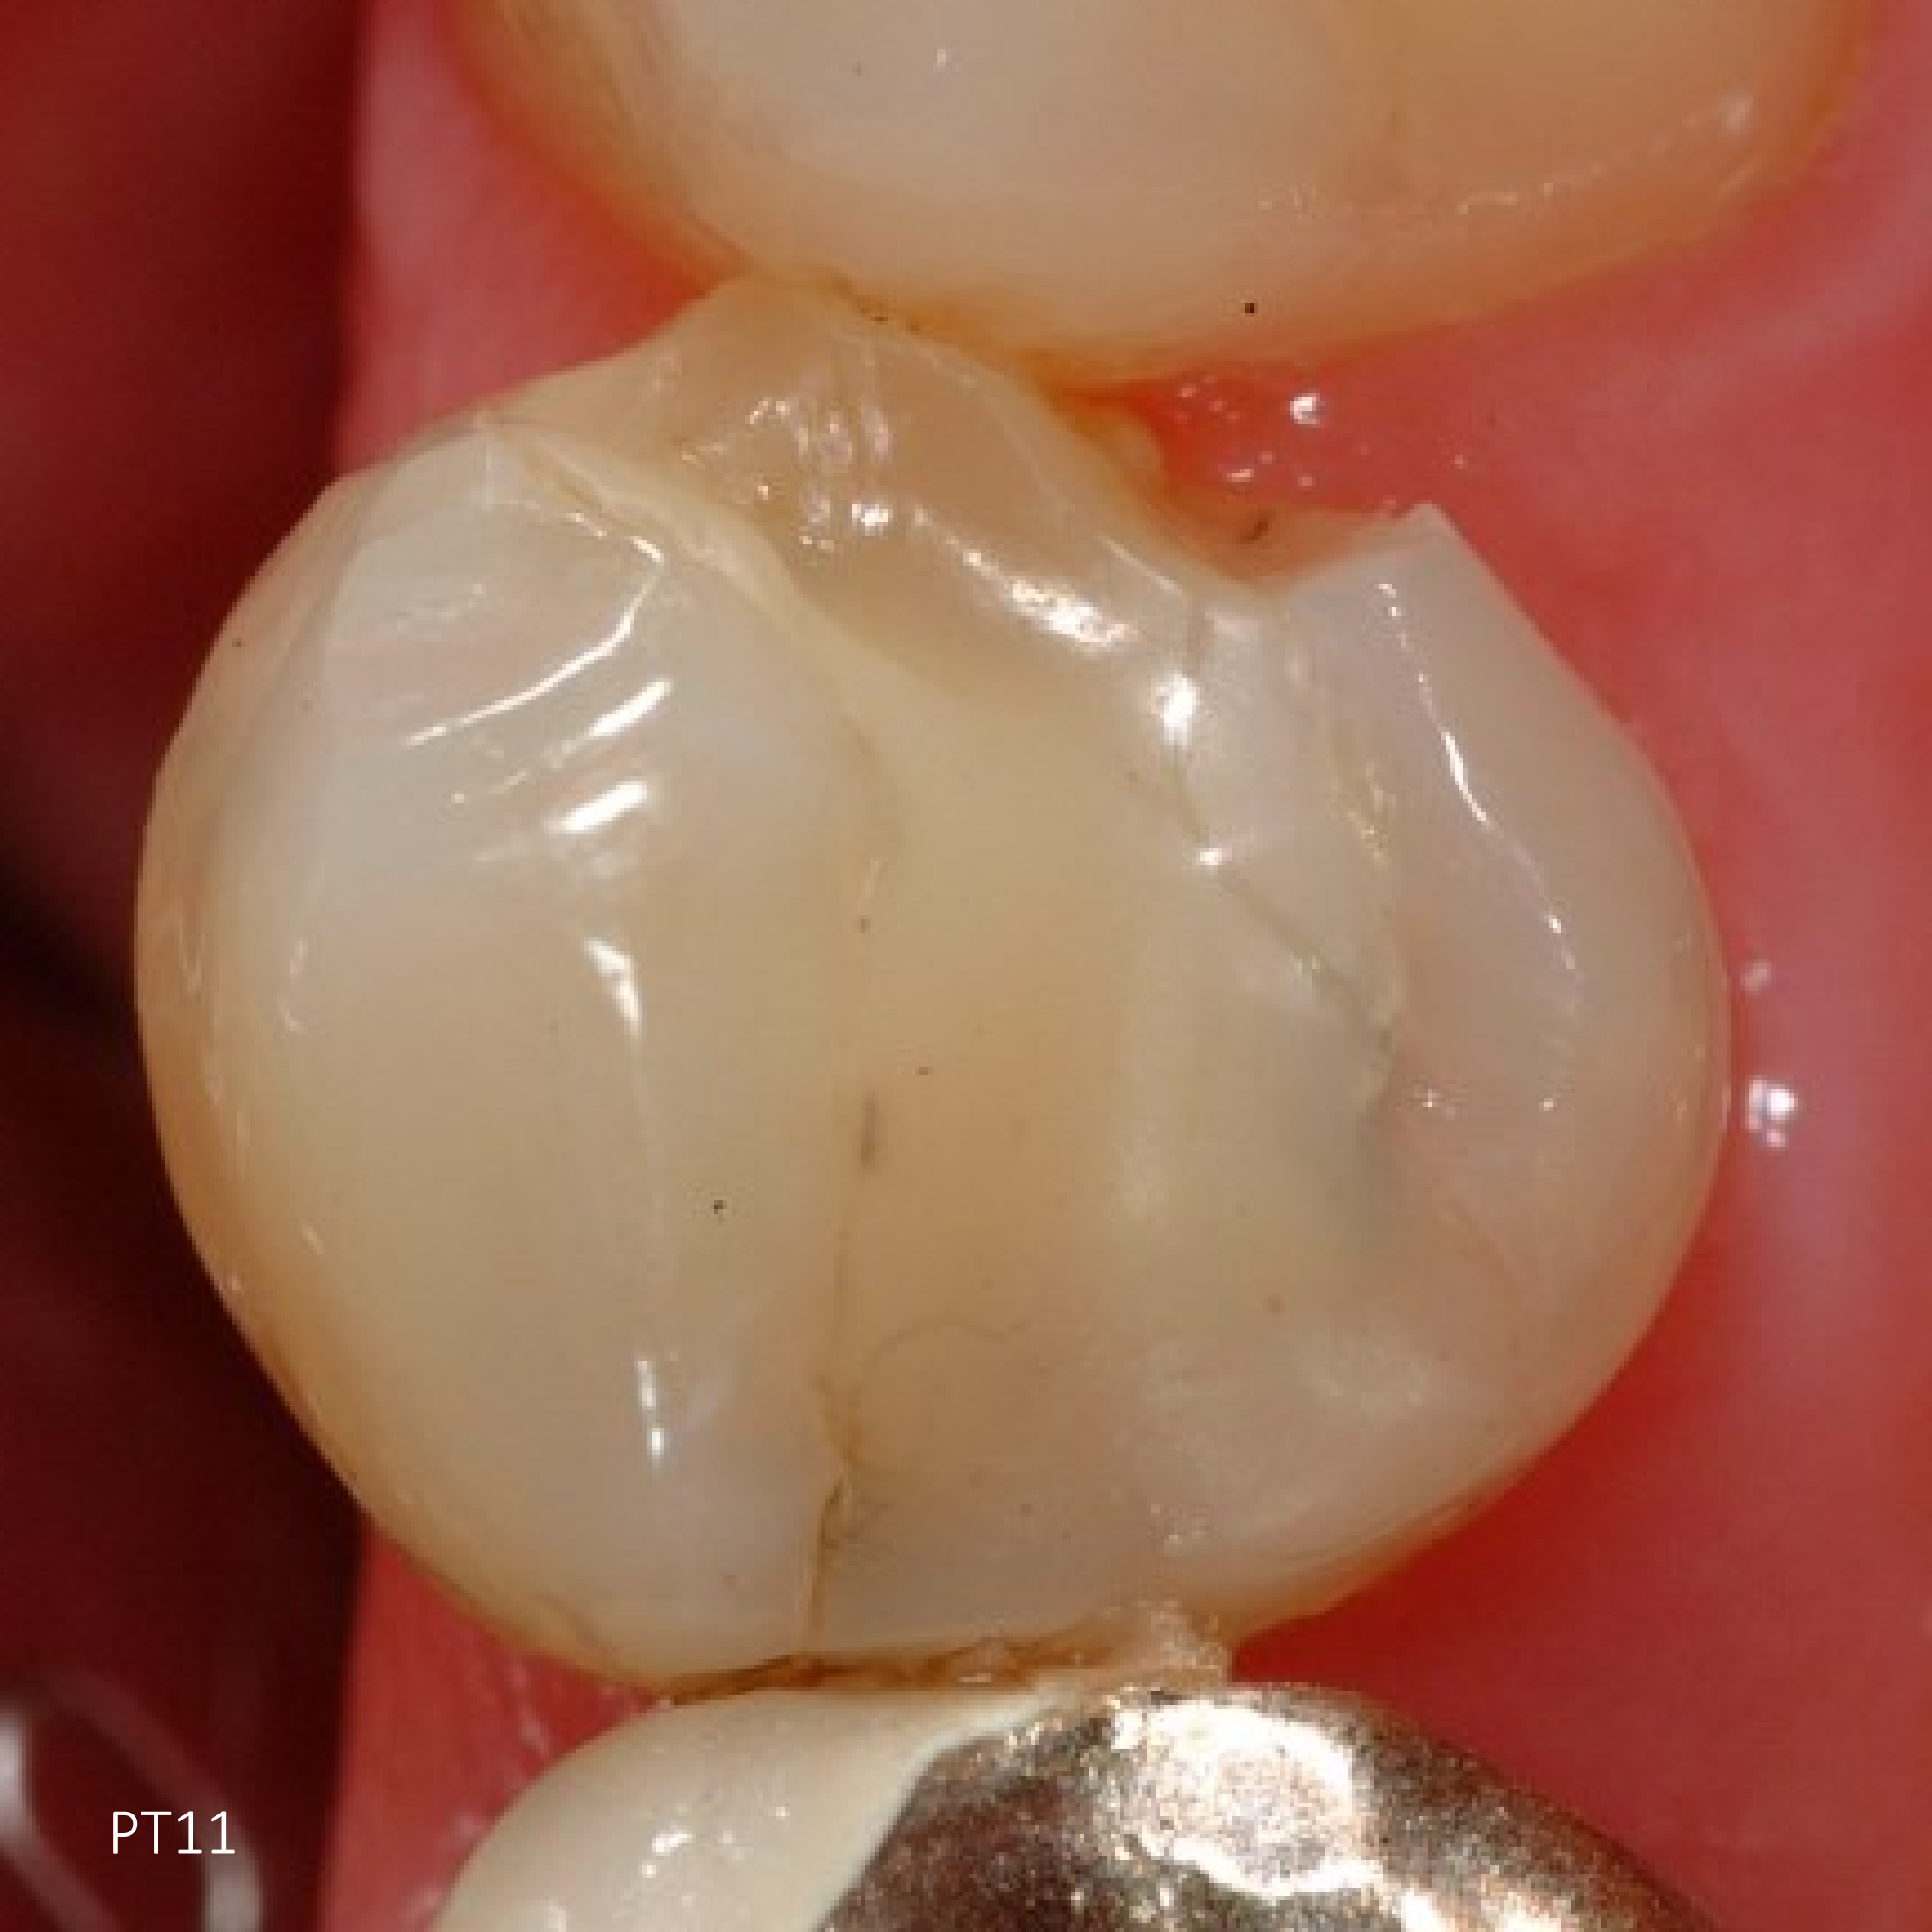

PT11



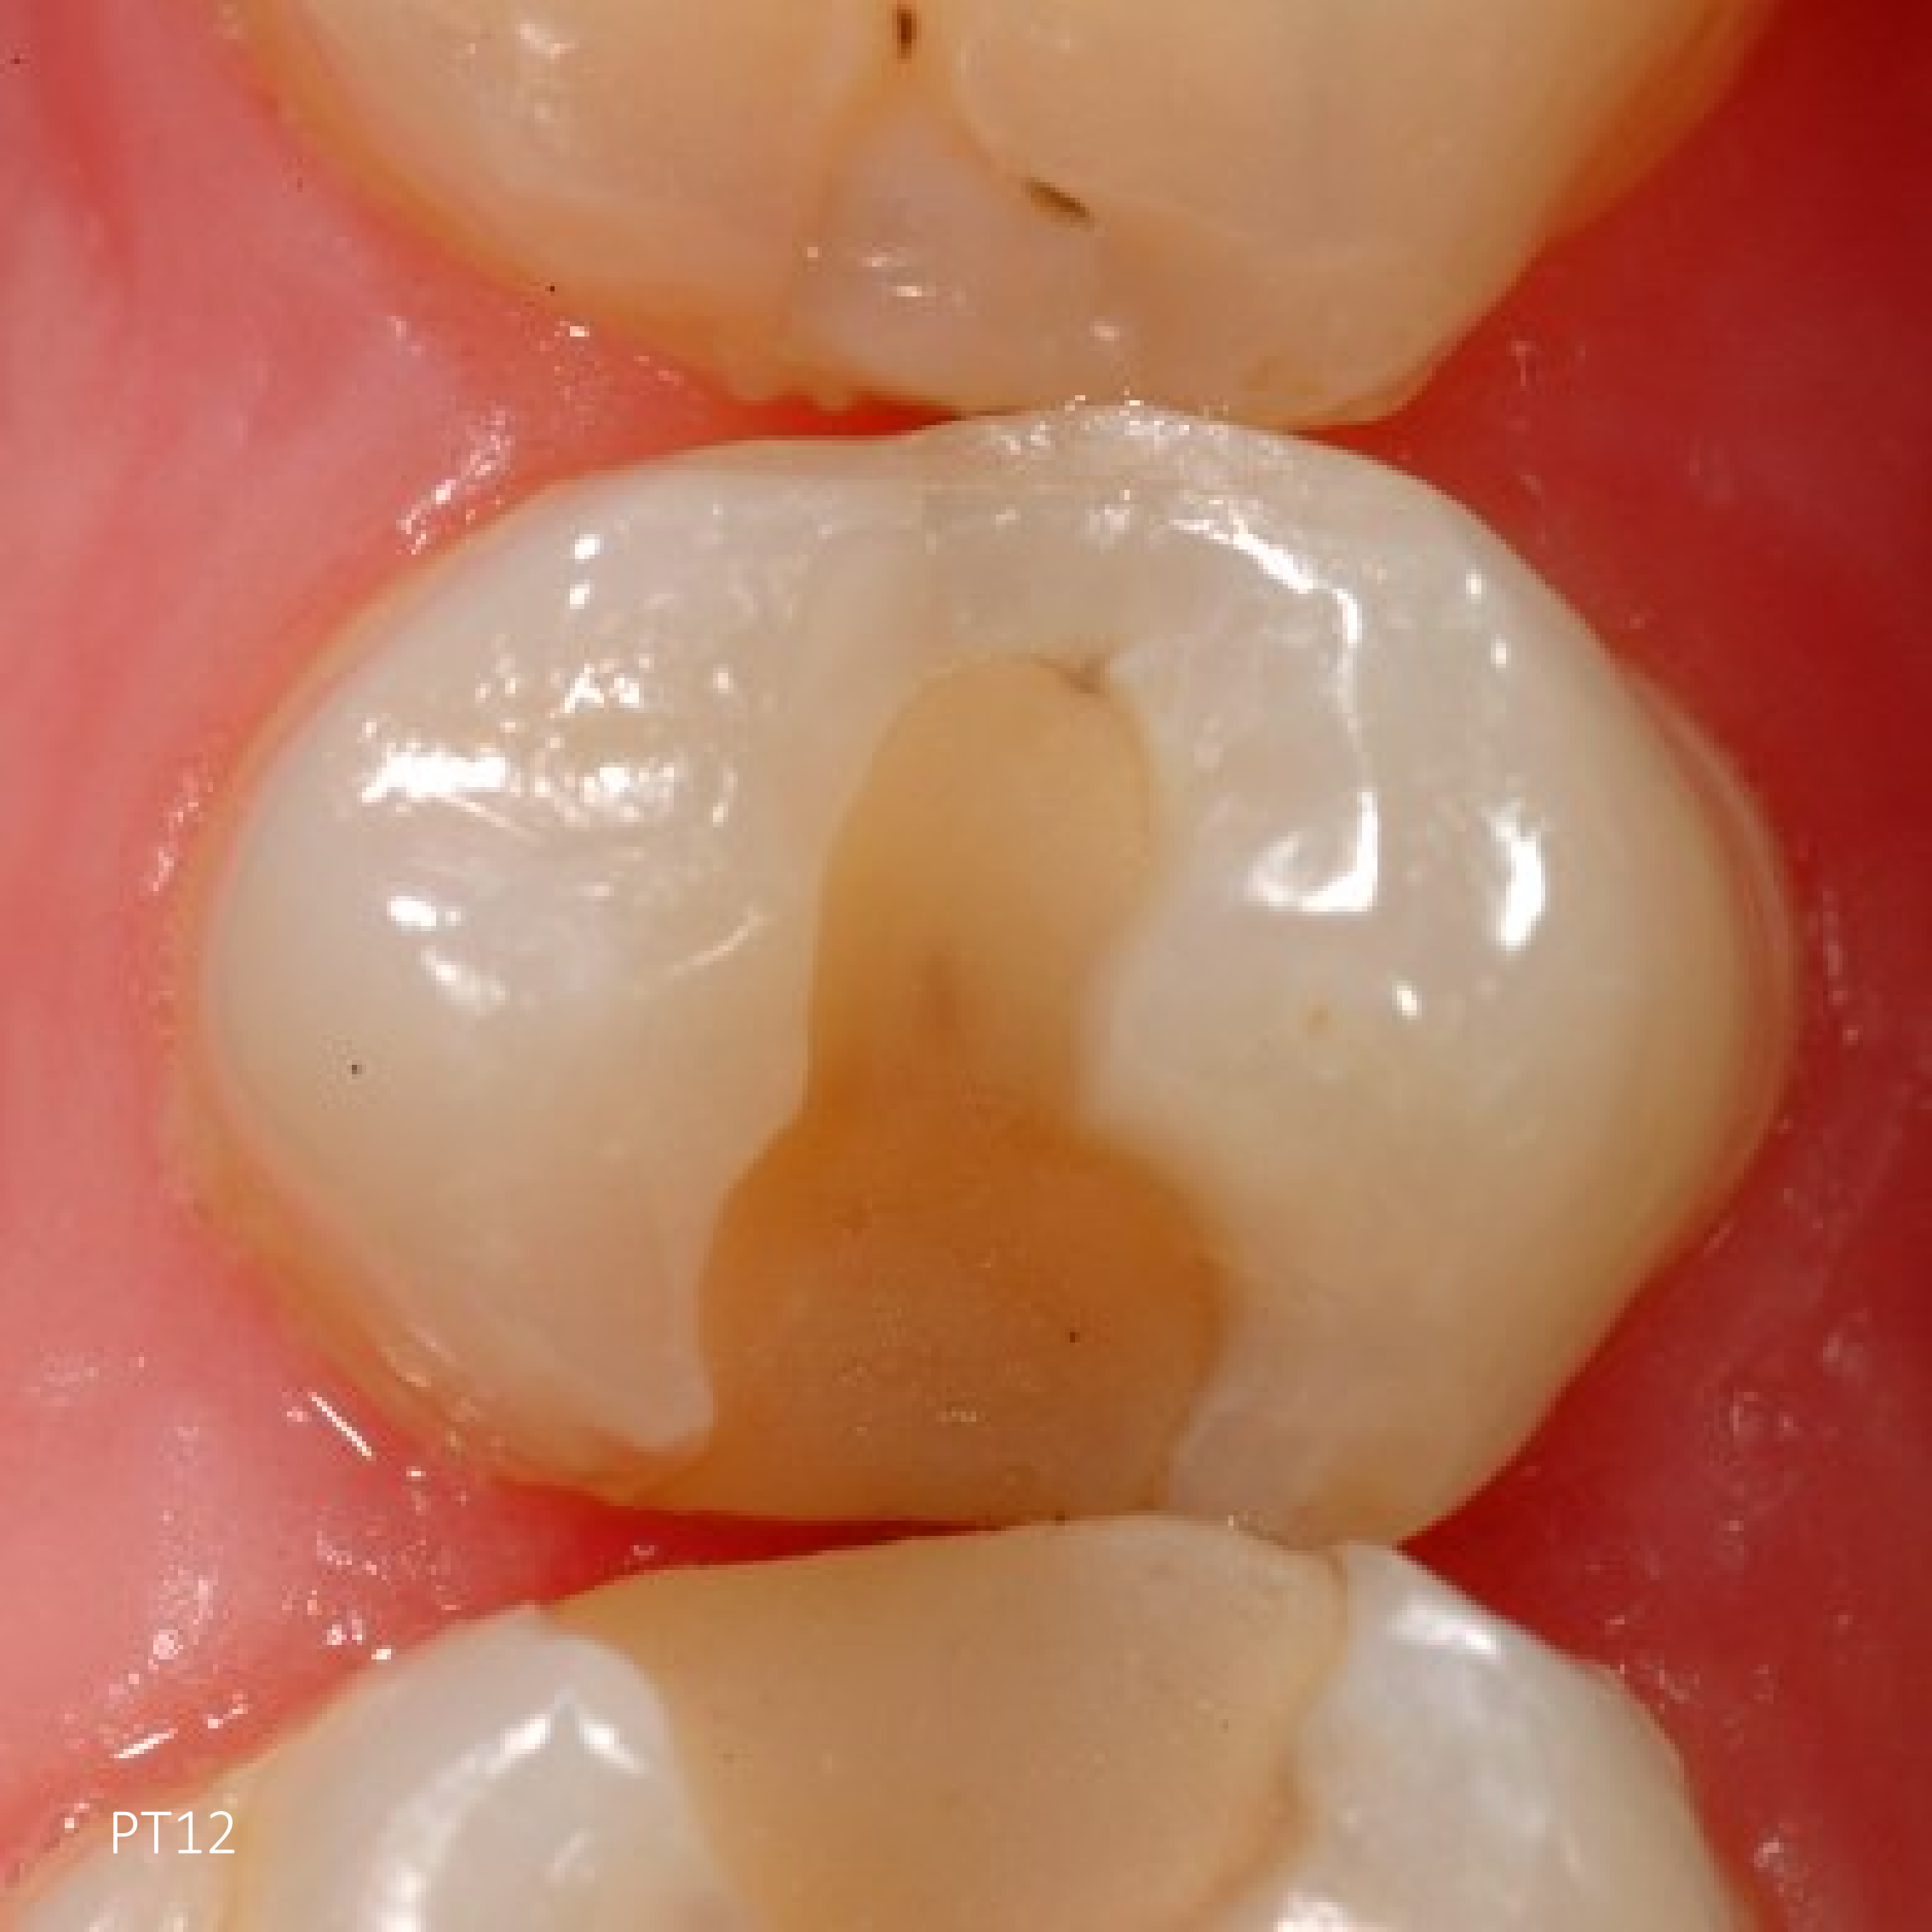

PT12

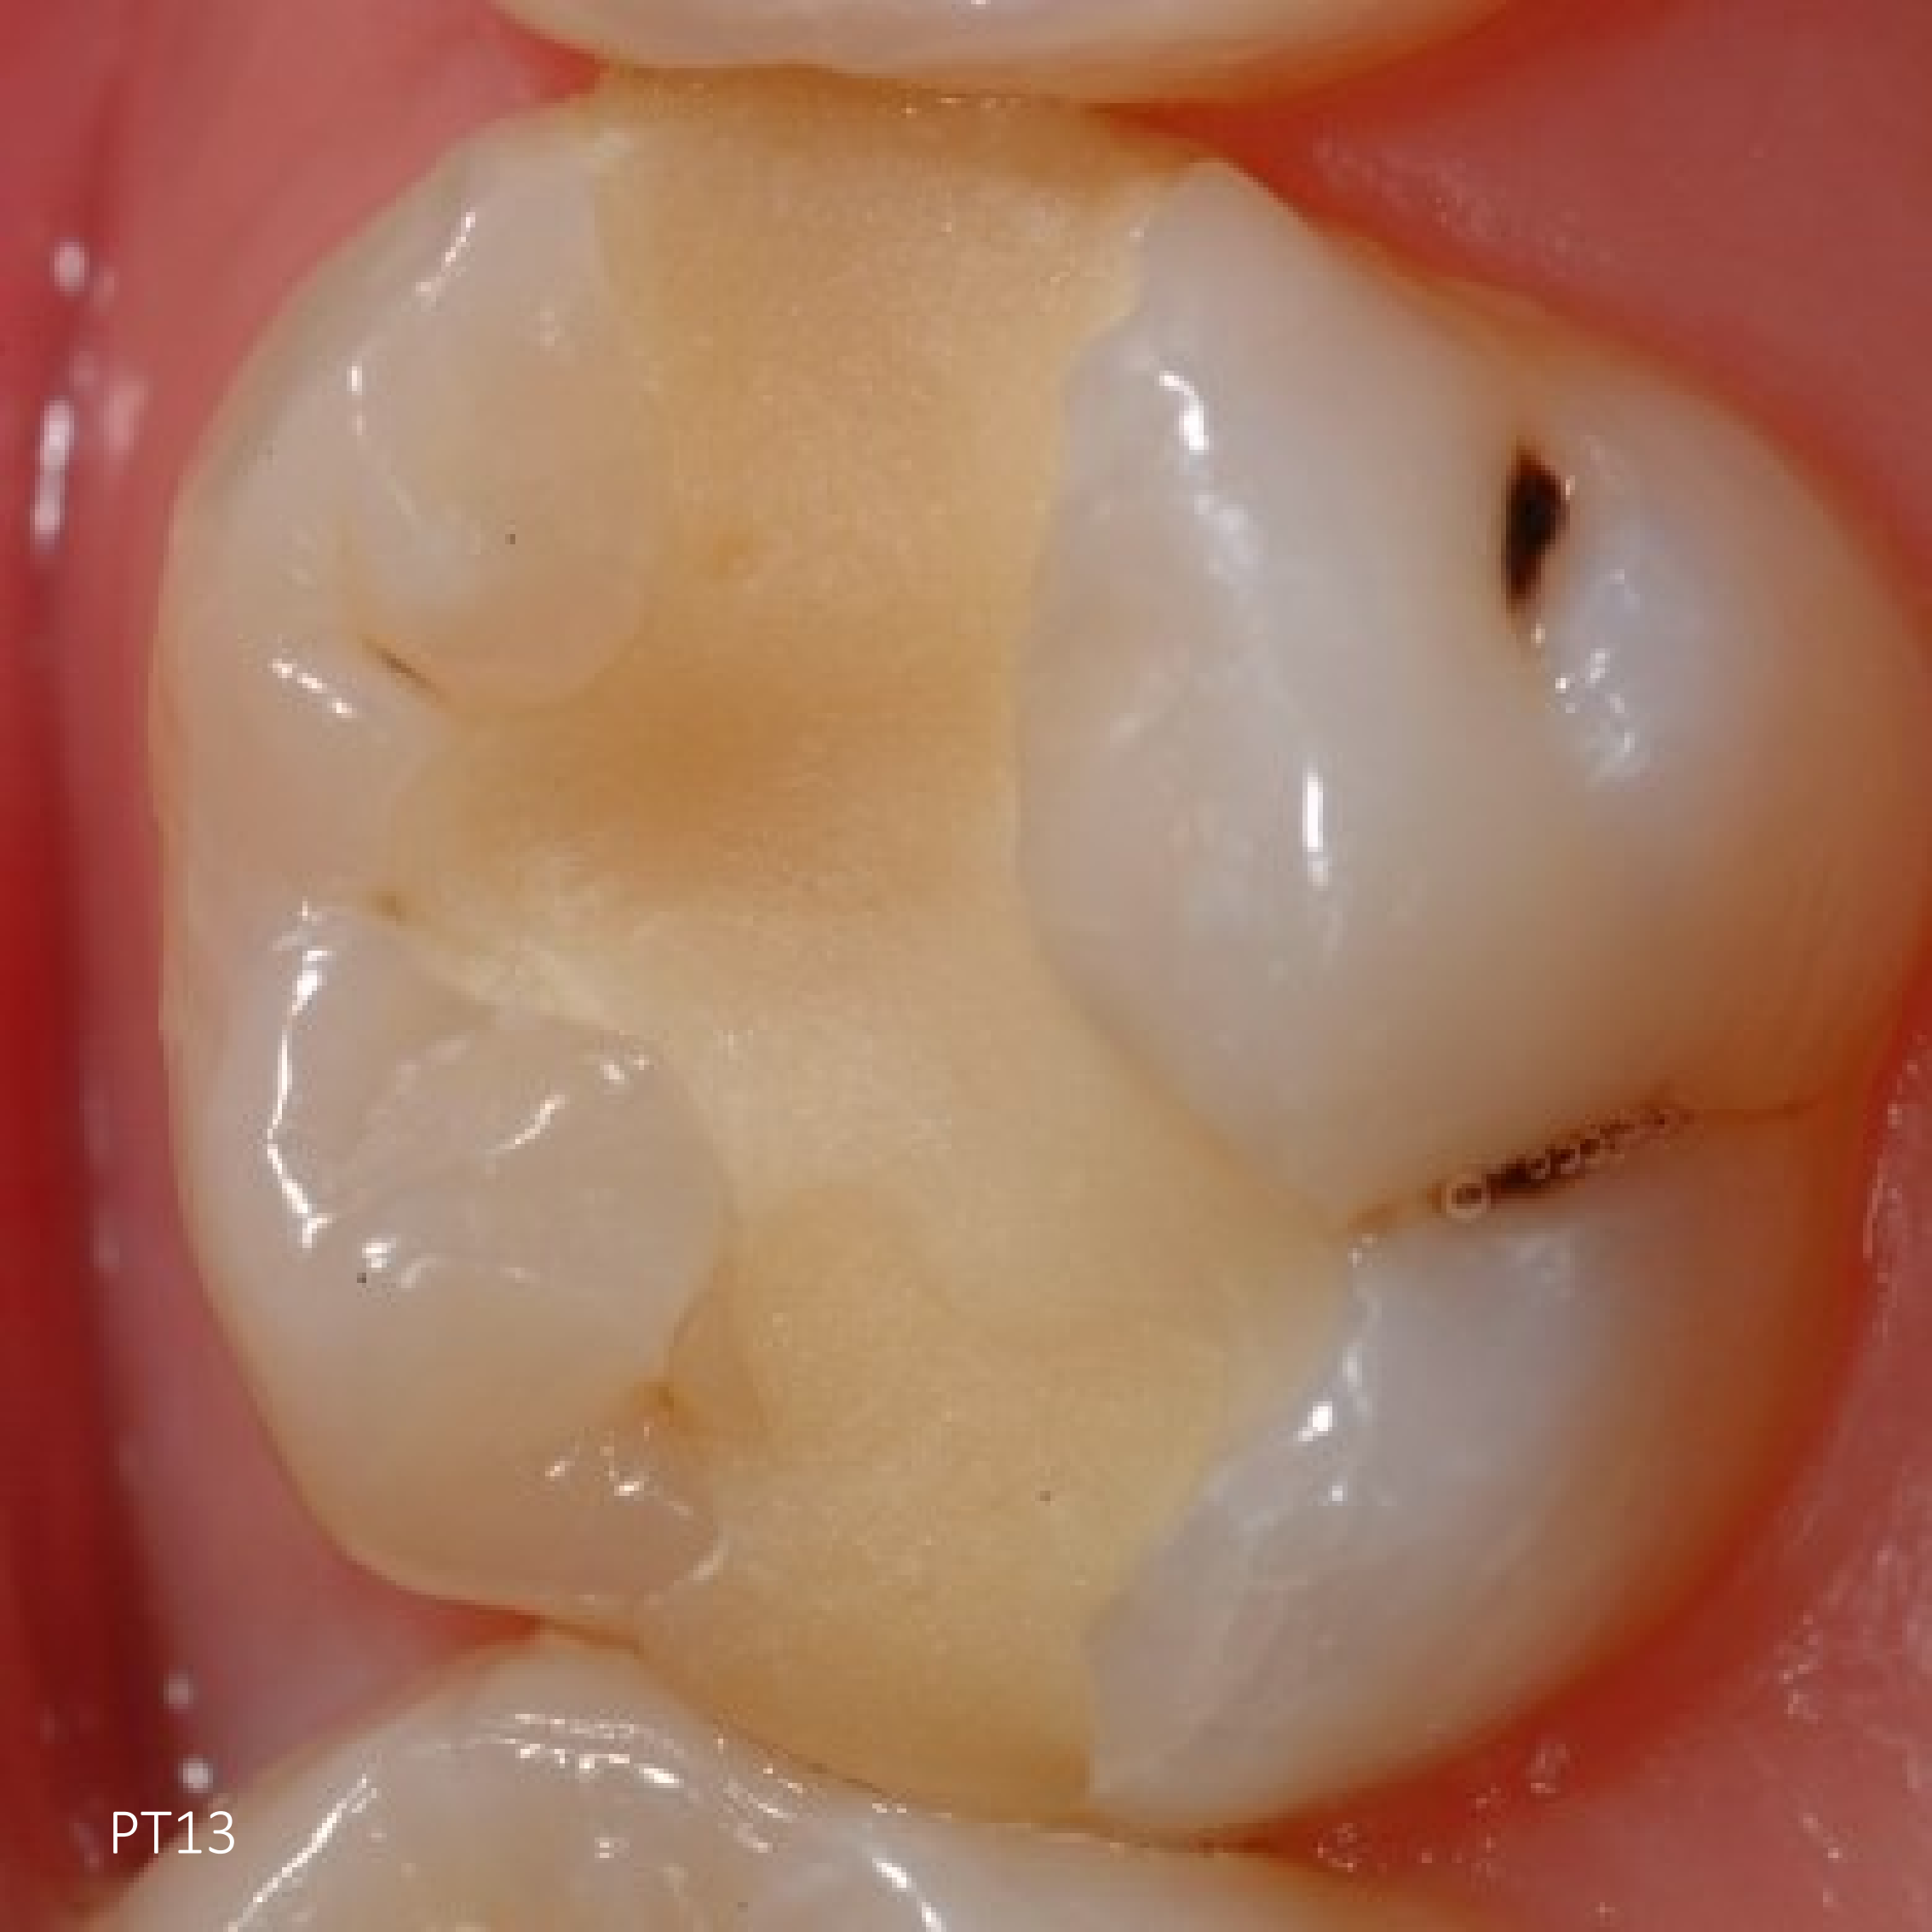

PT13

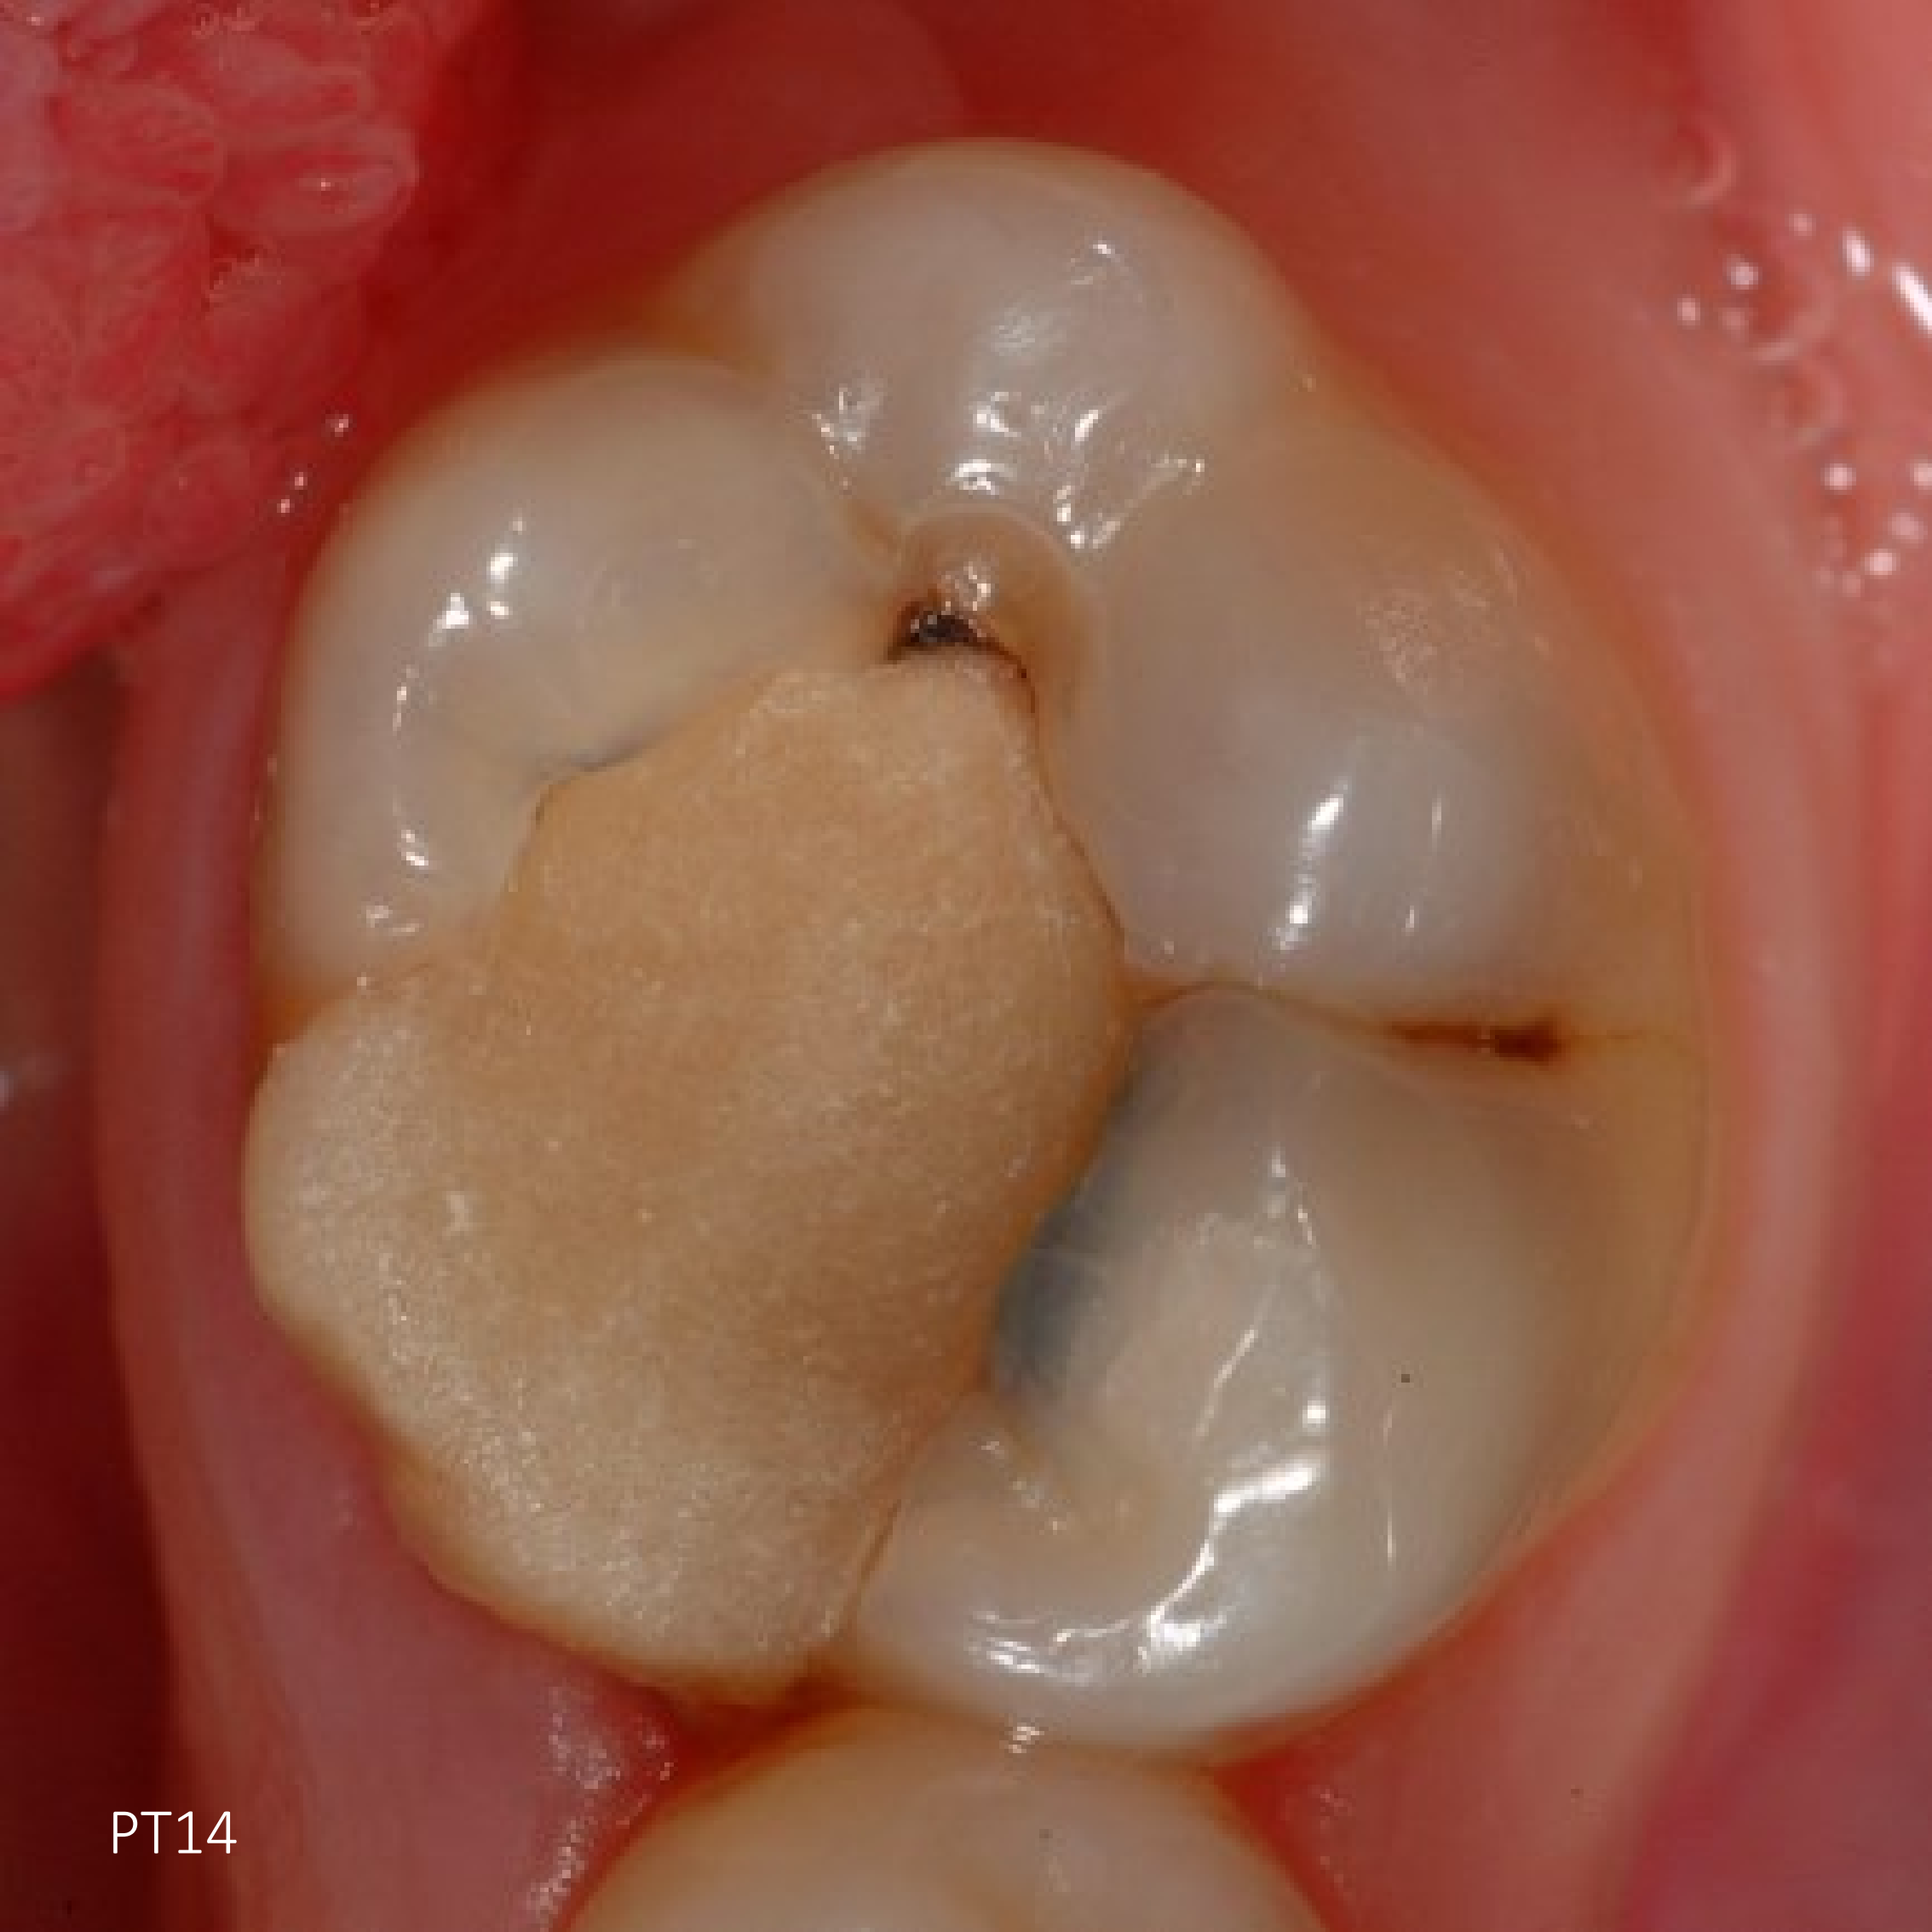

PT14

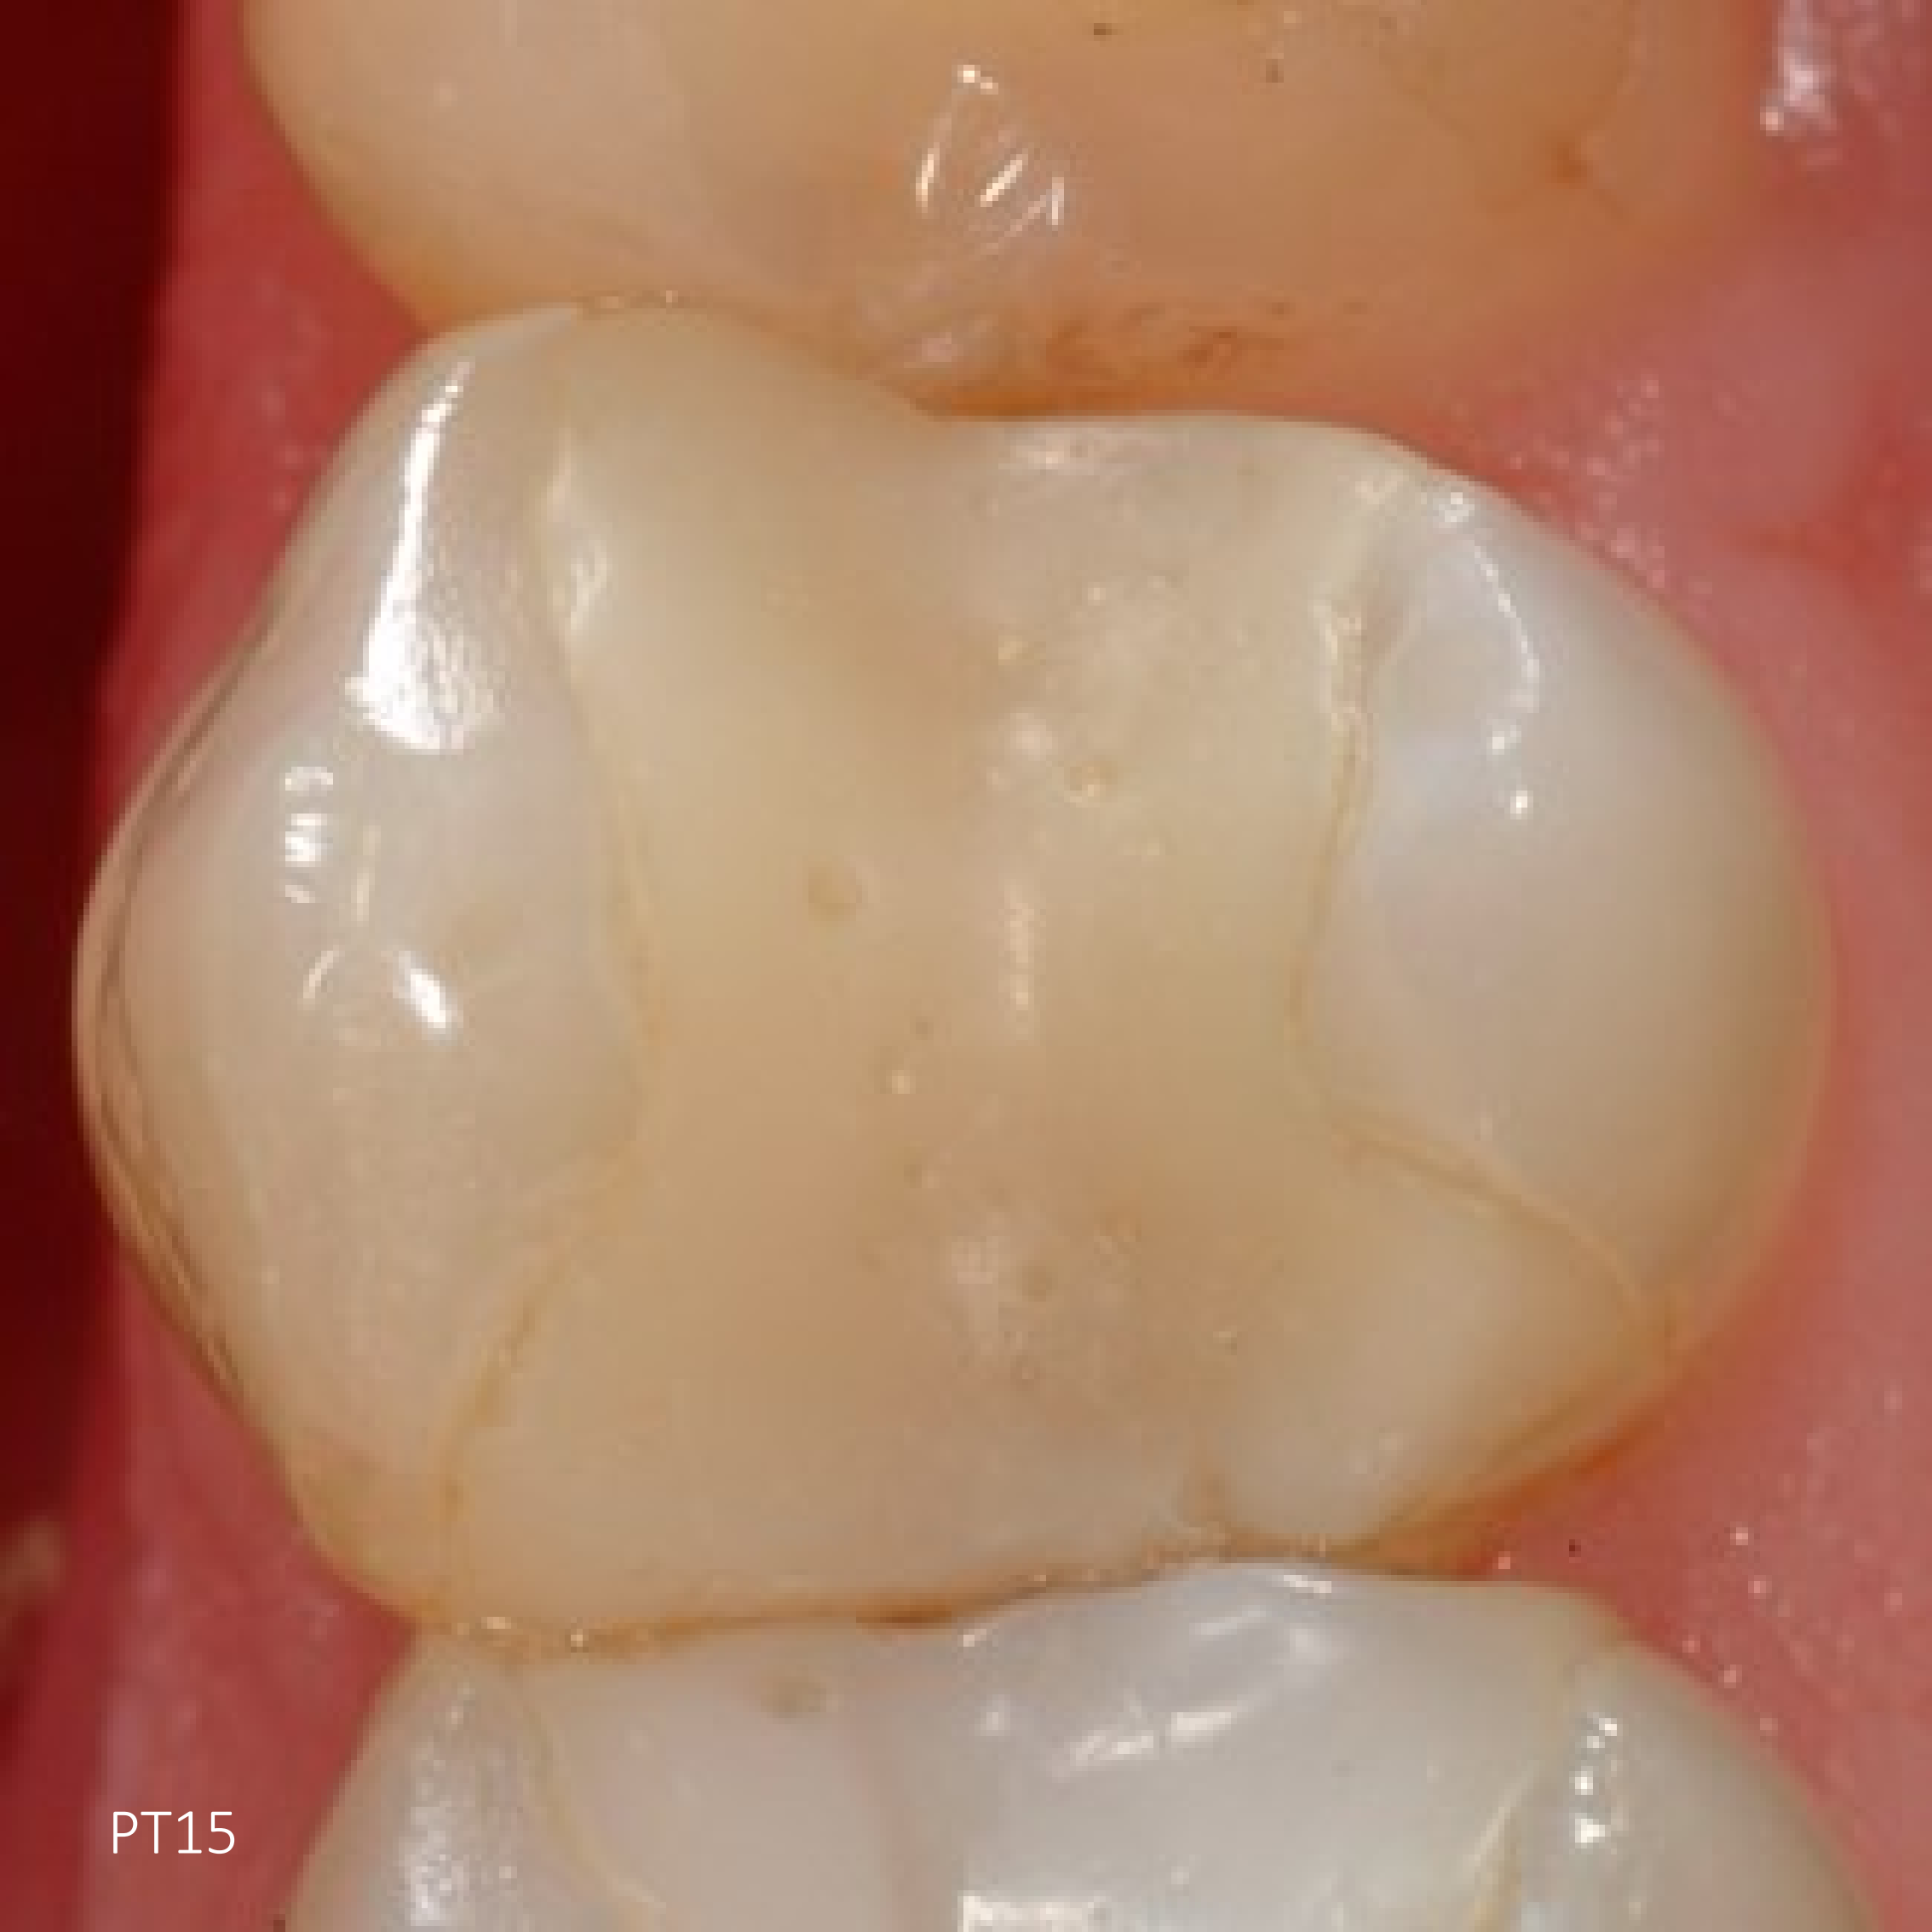

PT15

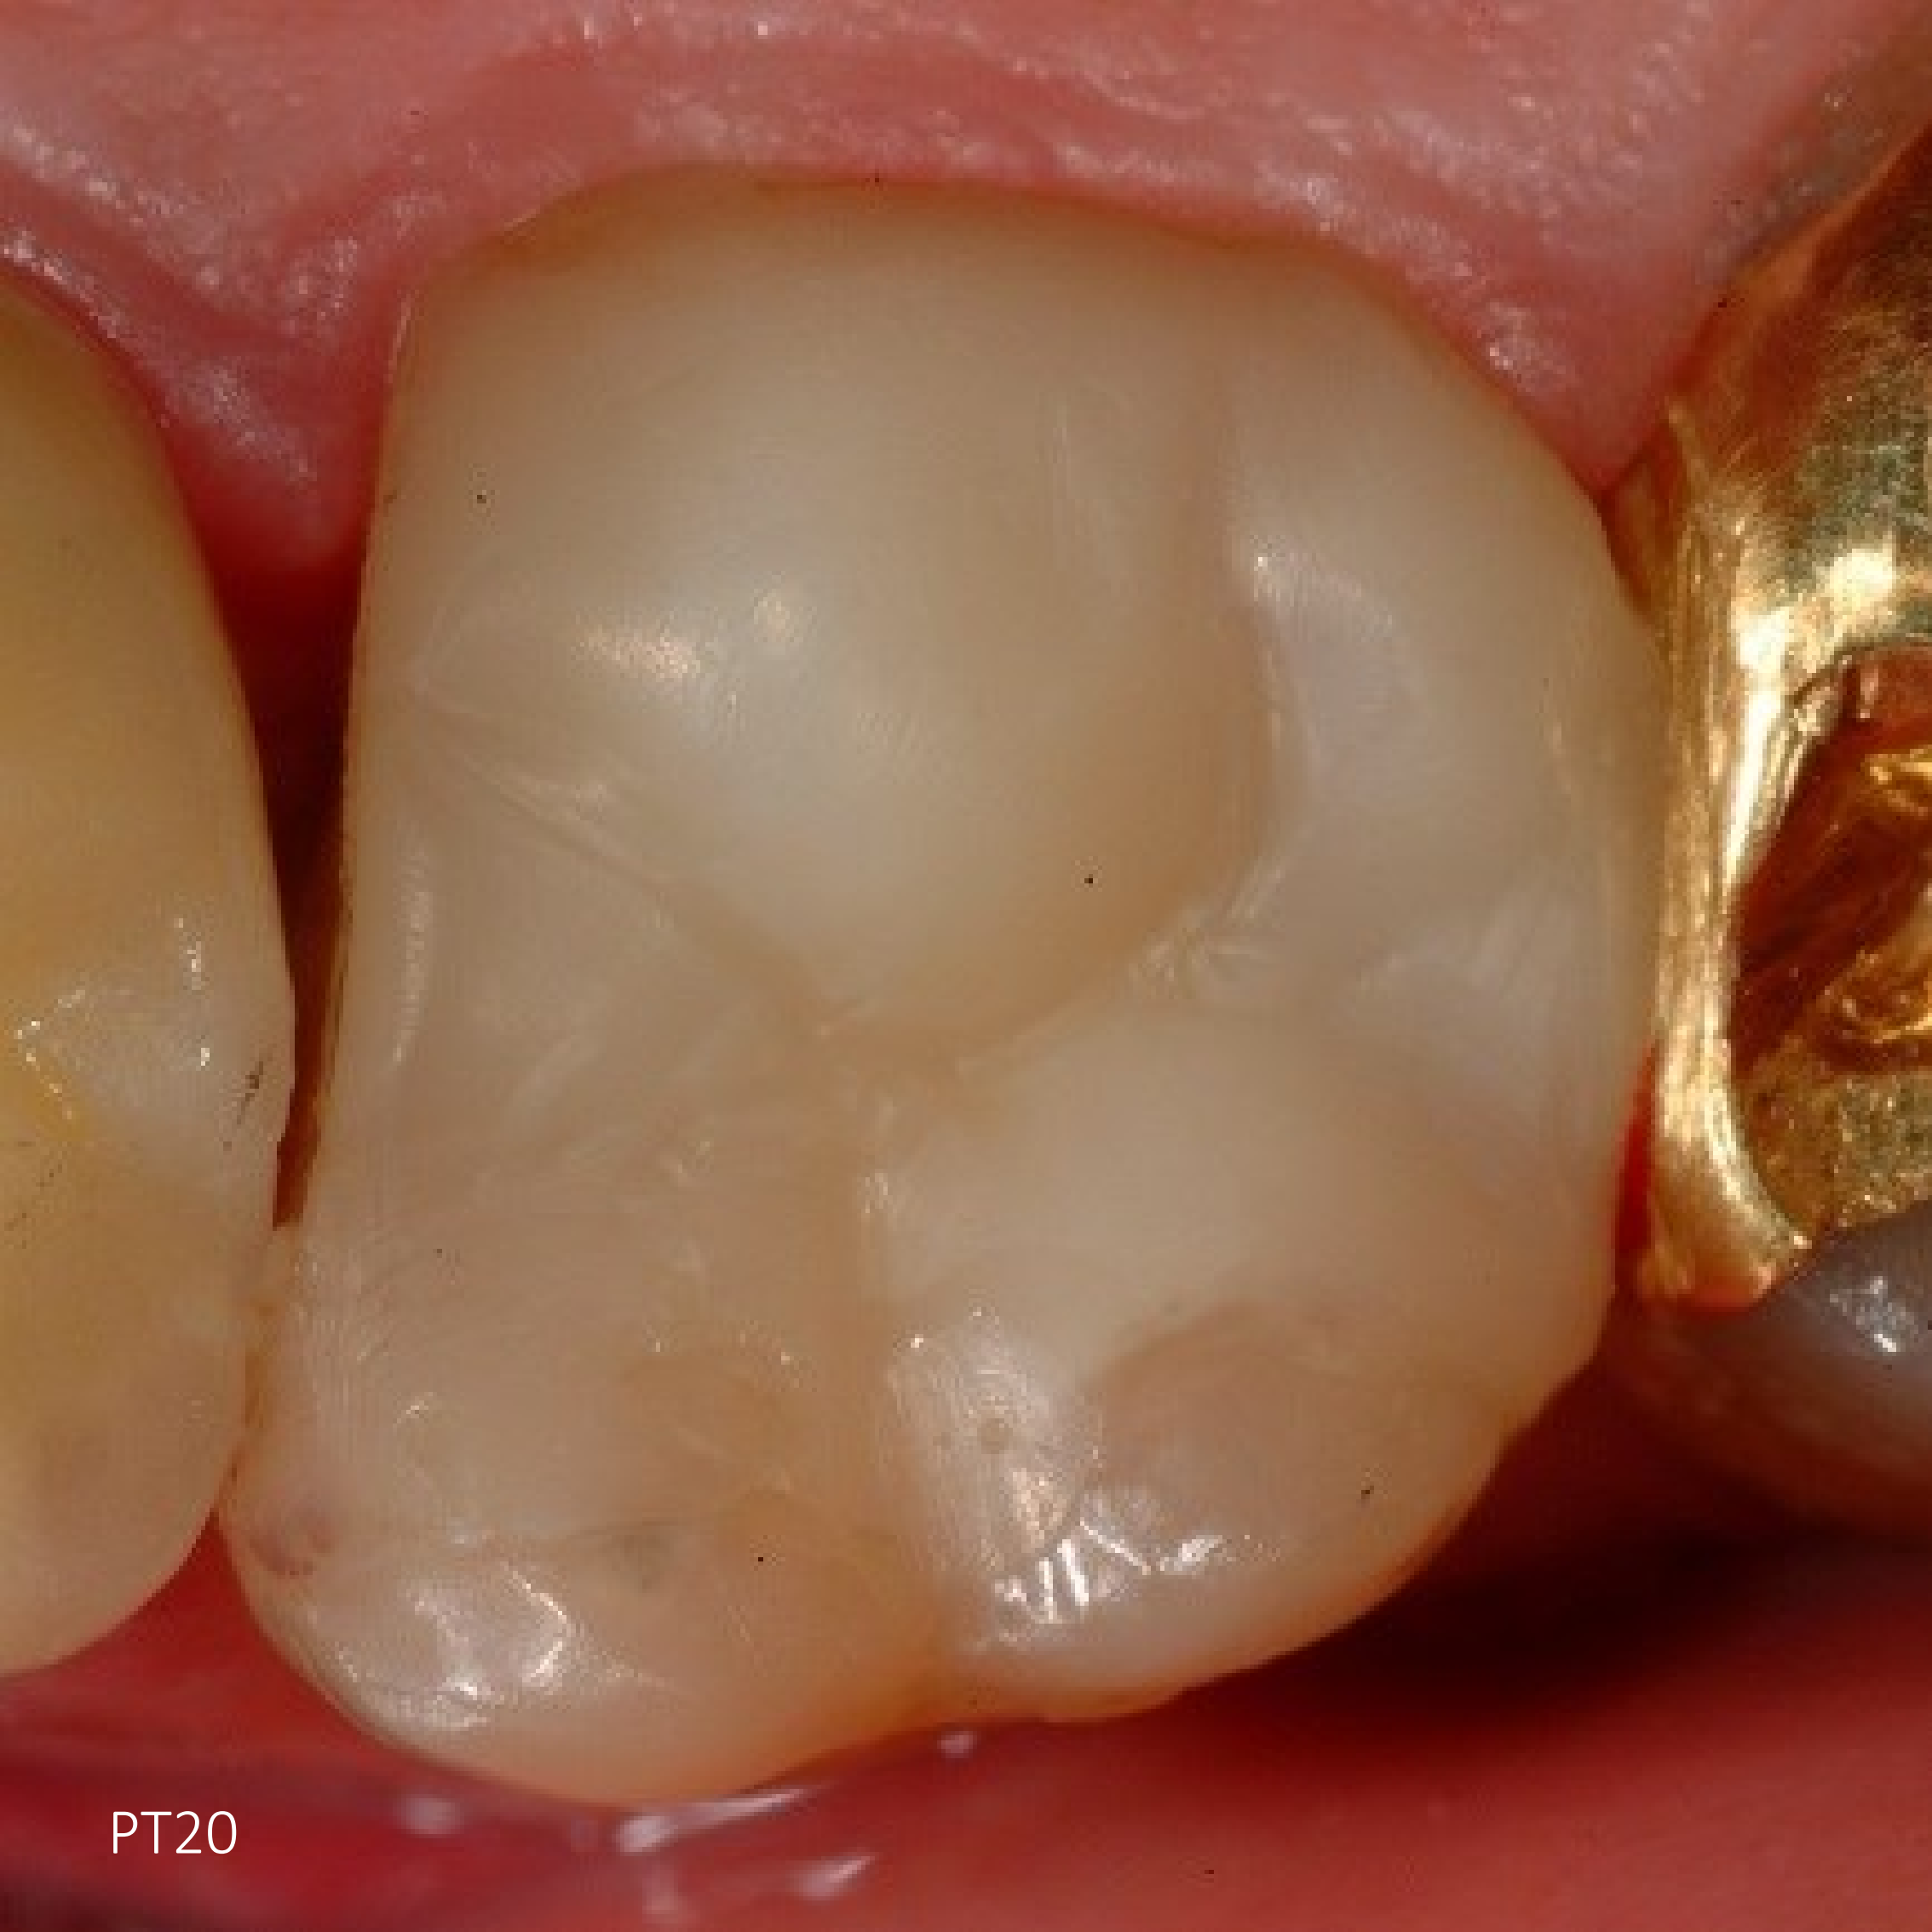

PT20

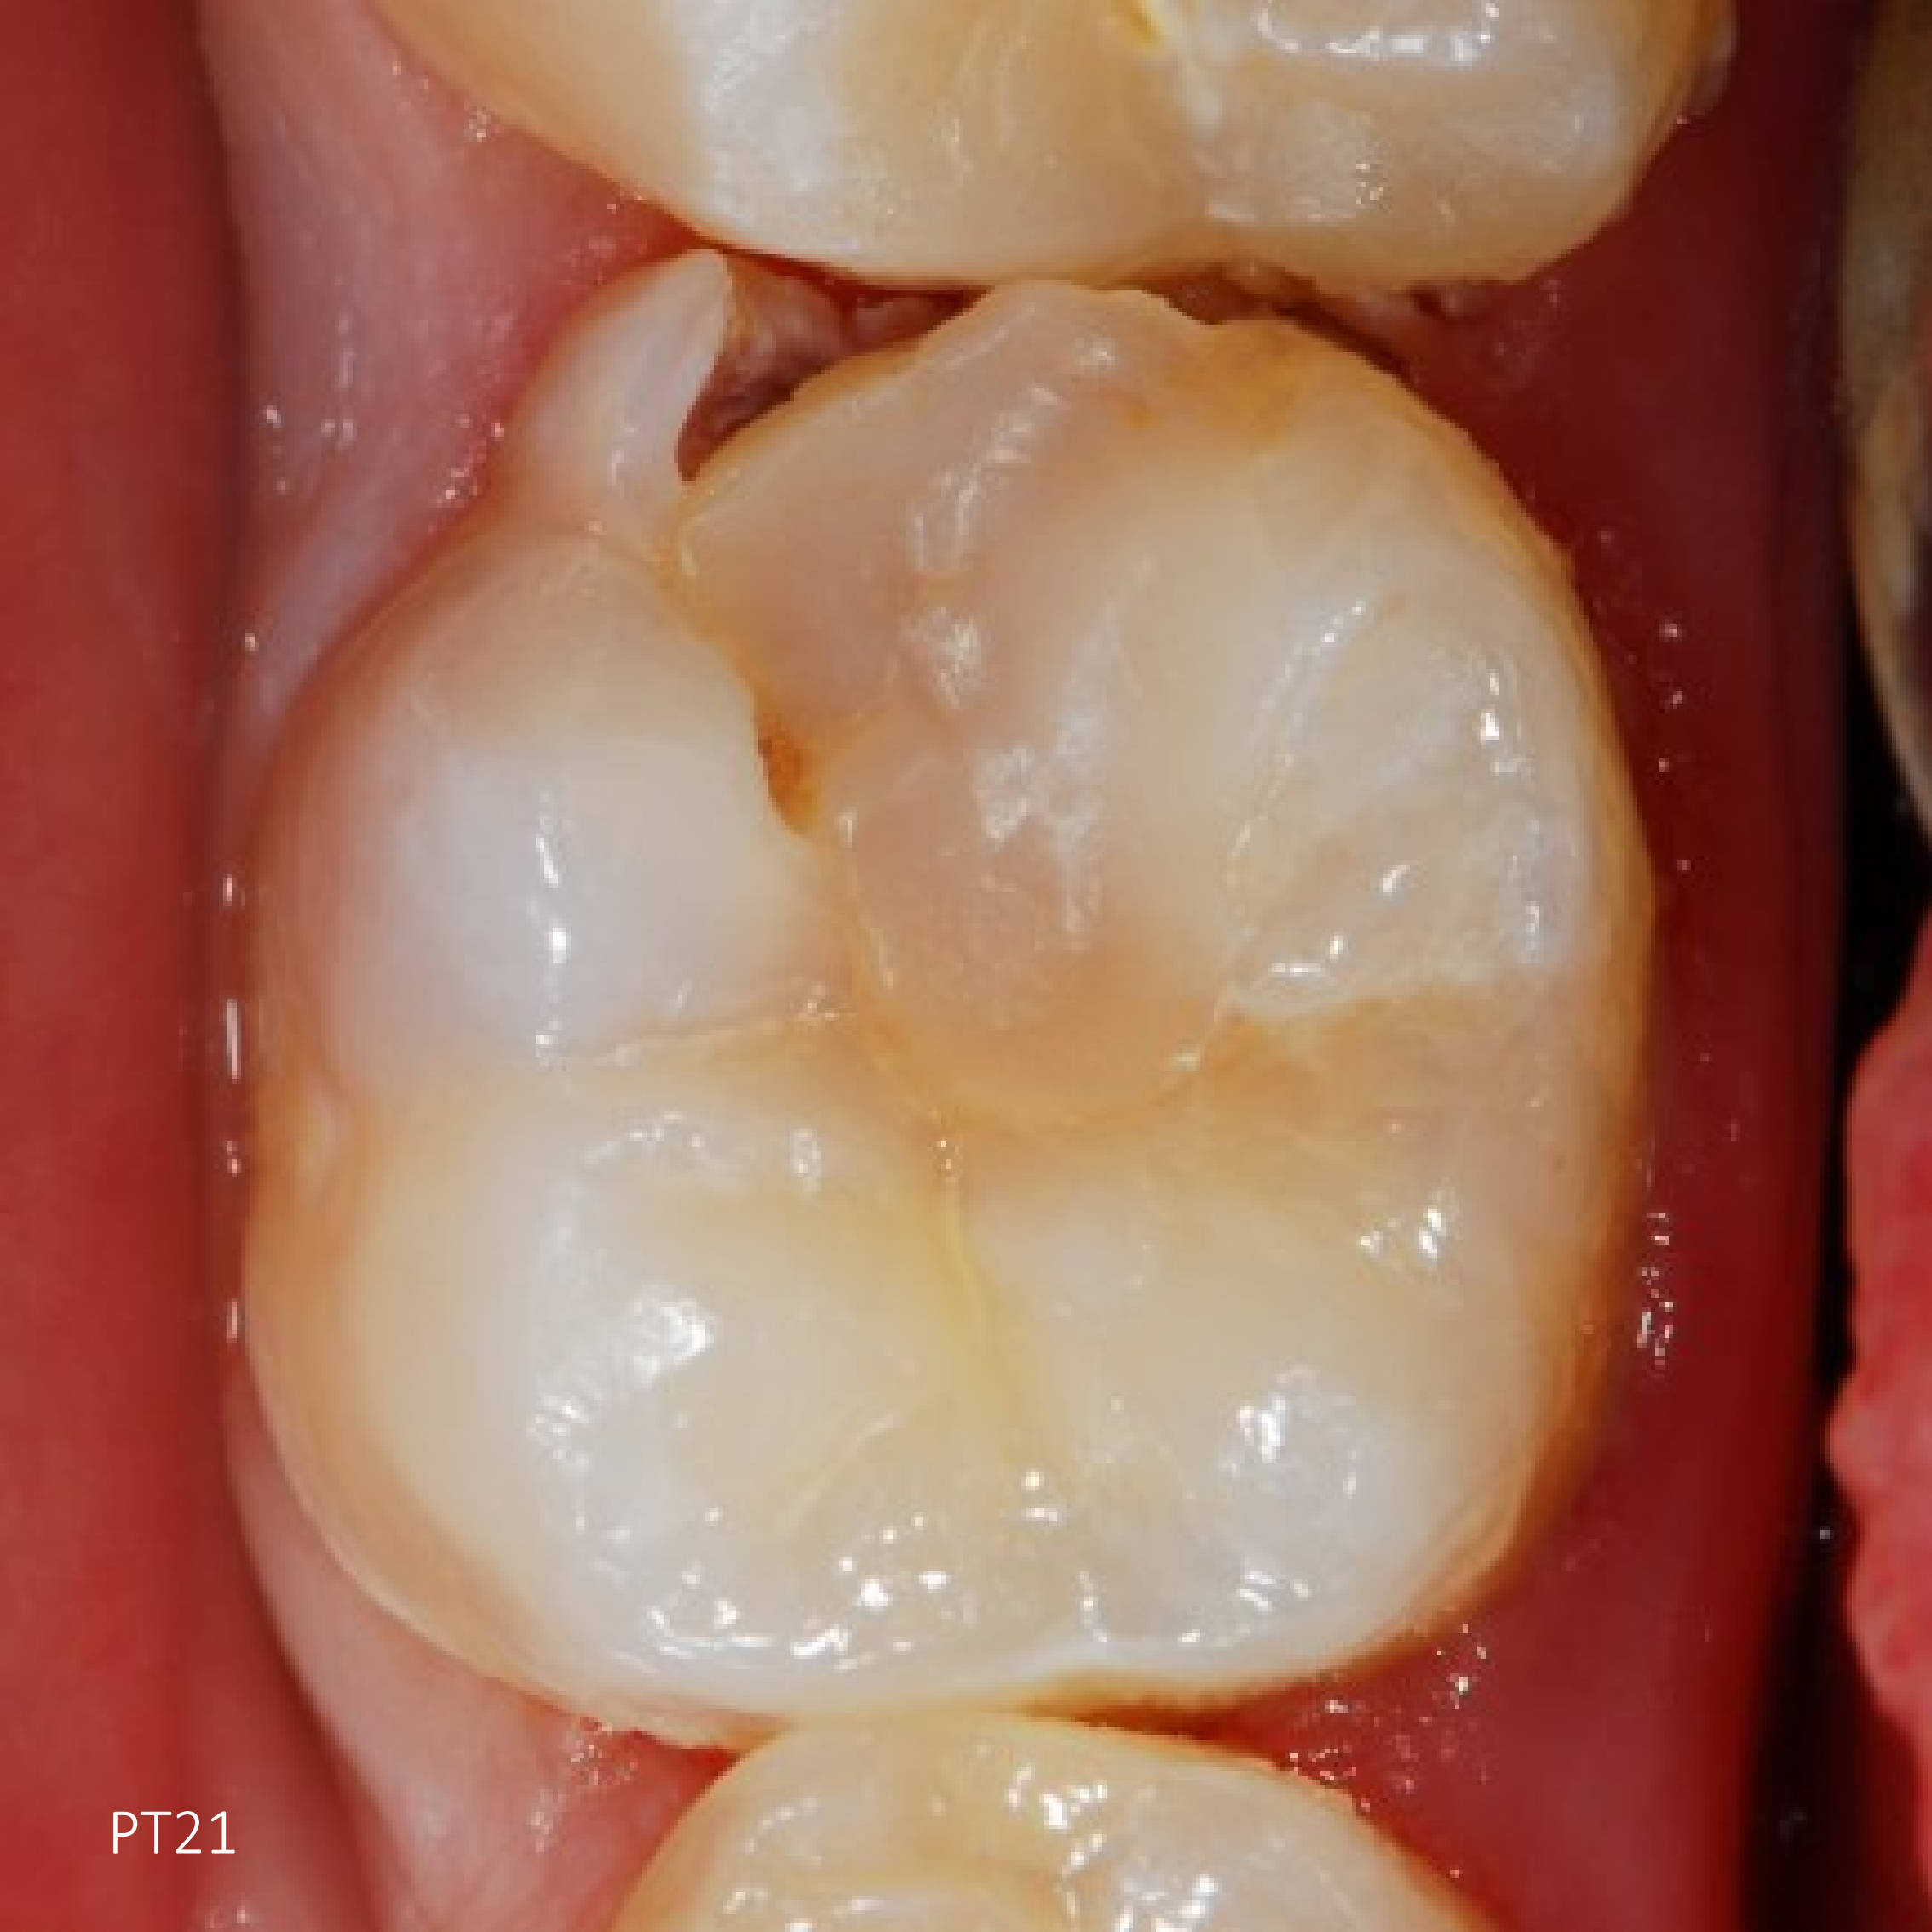

PT21

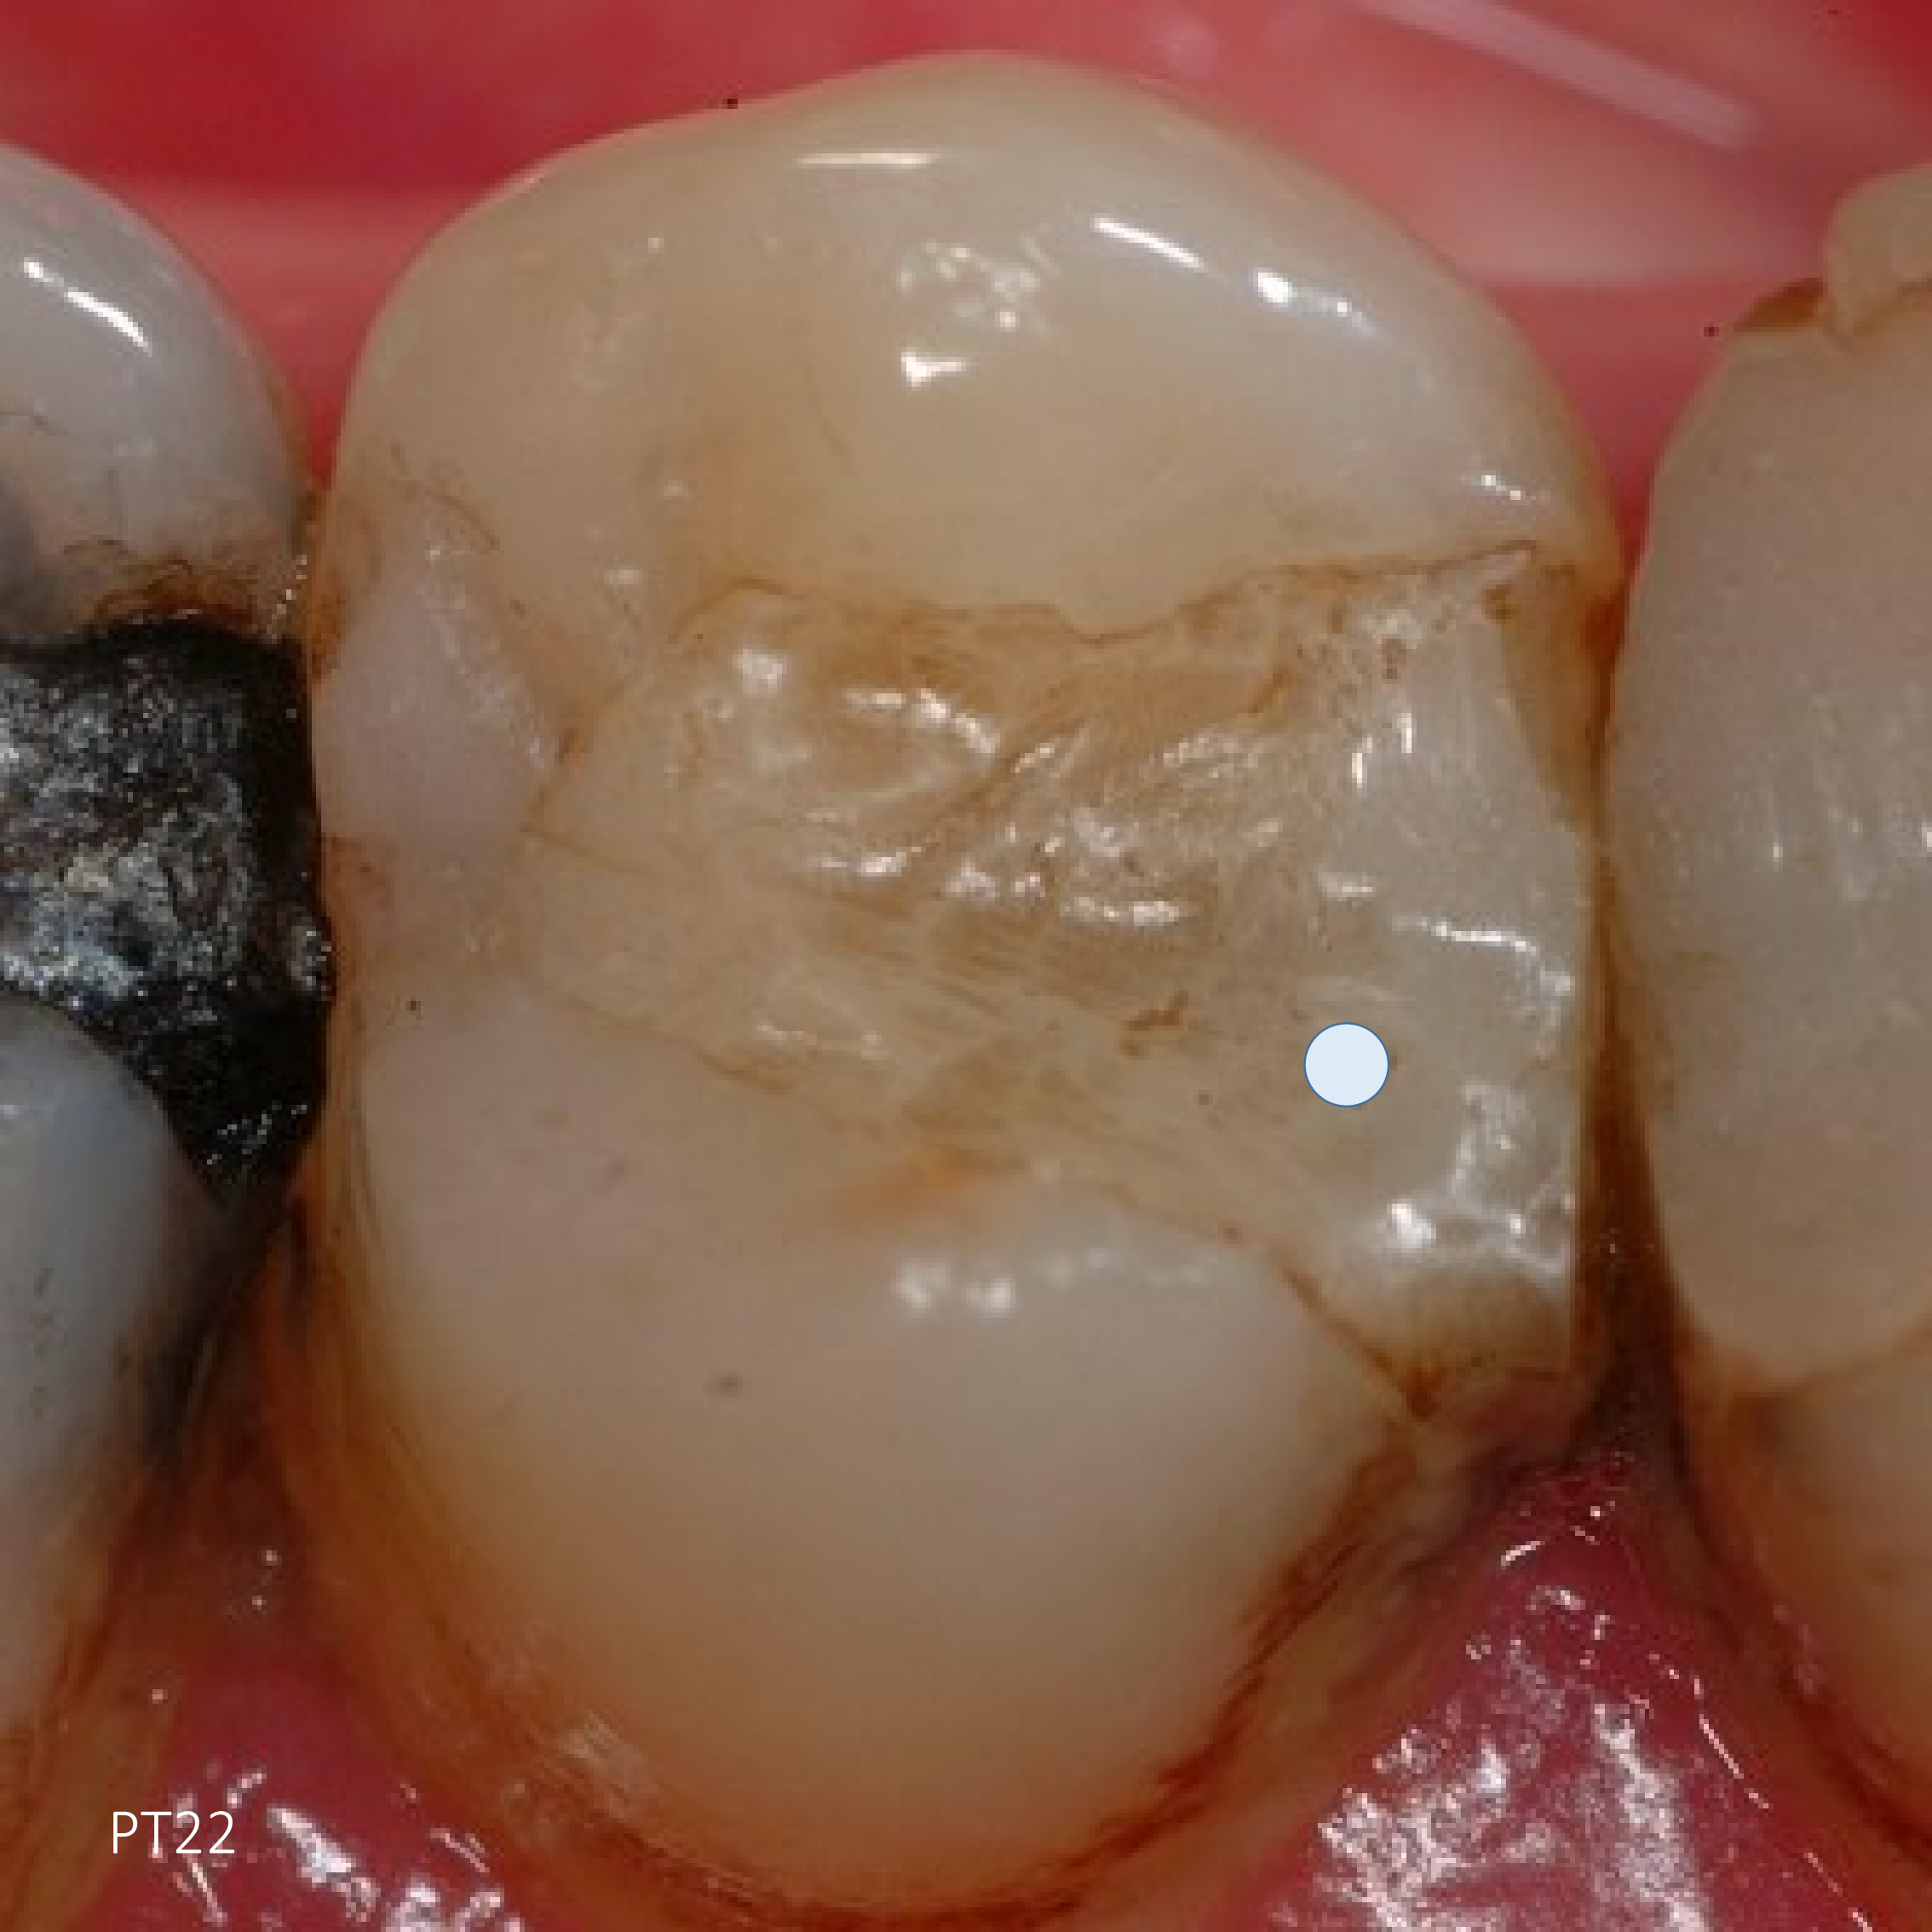

PT22

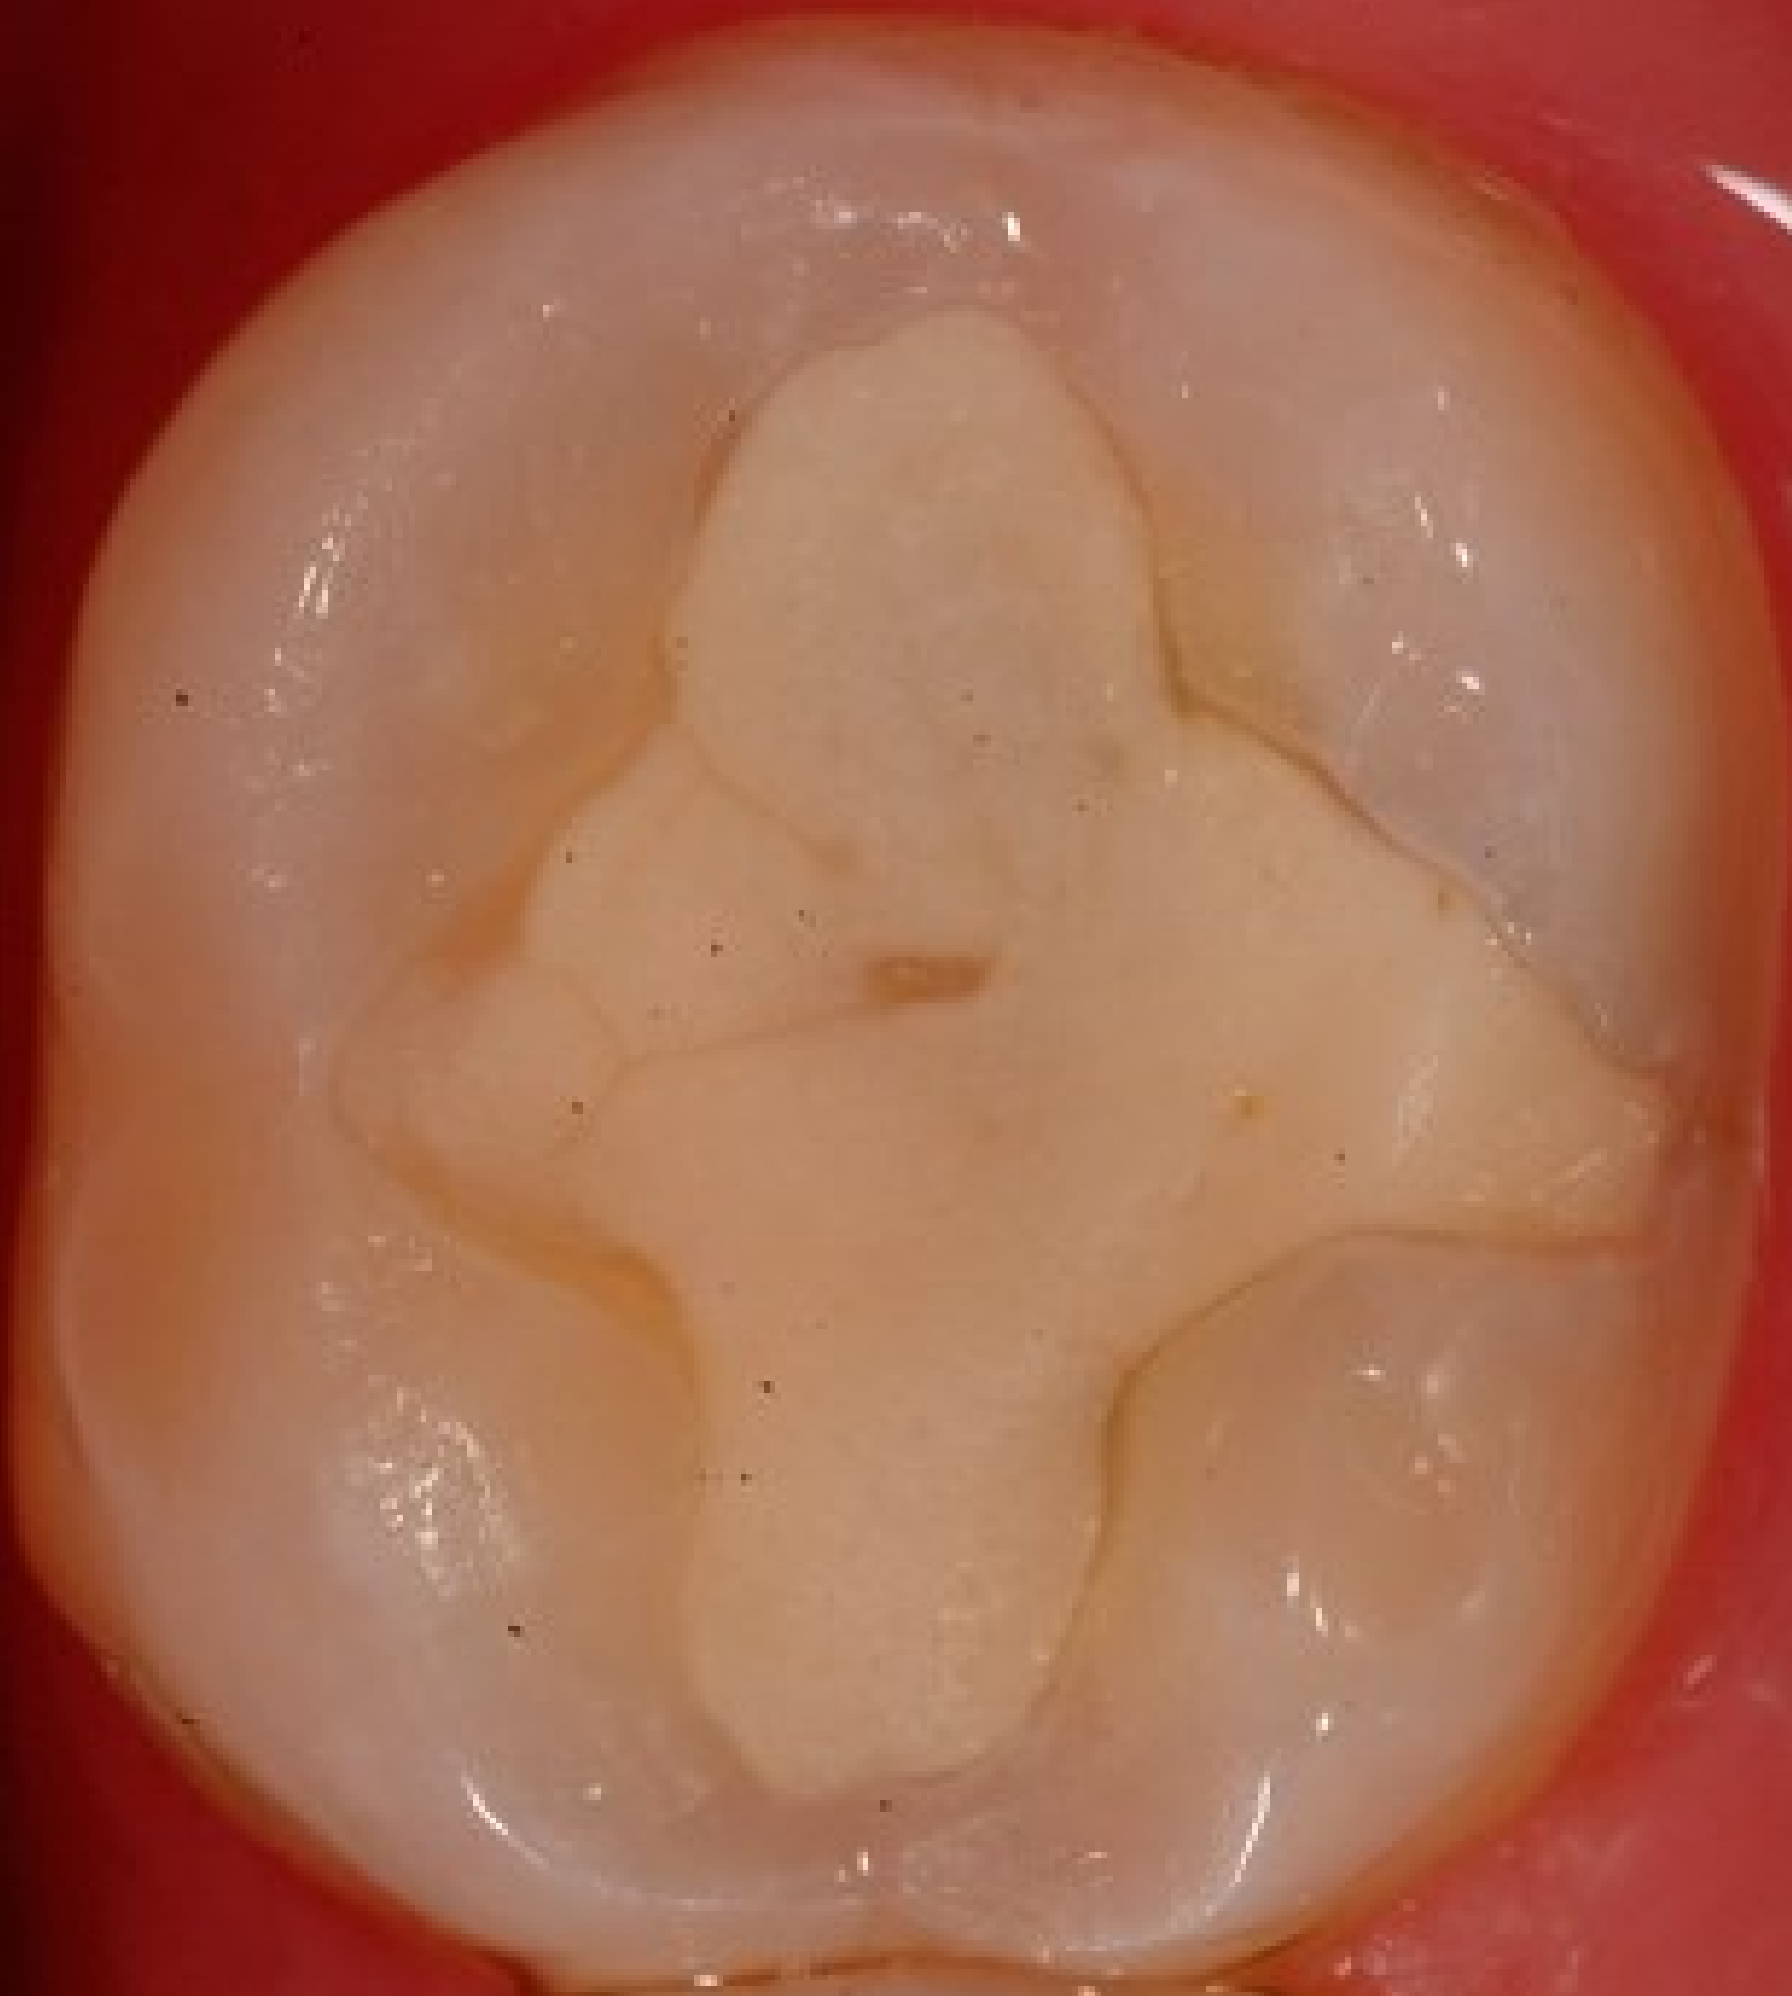

PT25



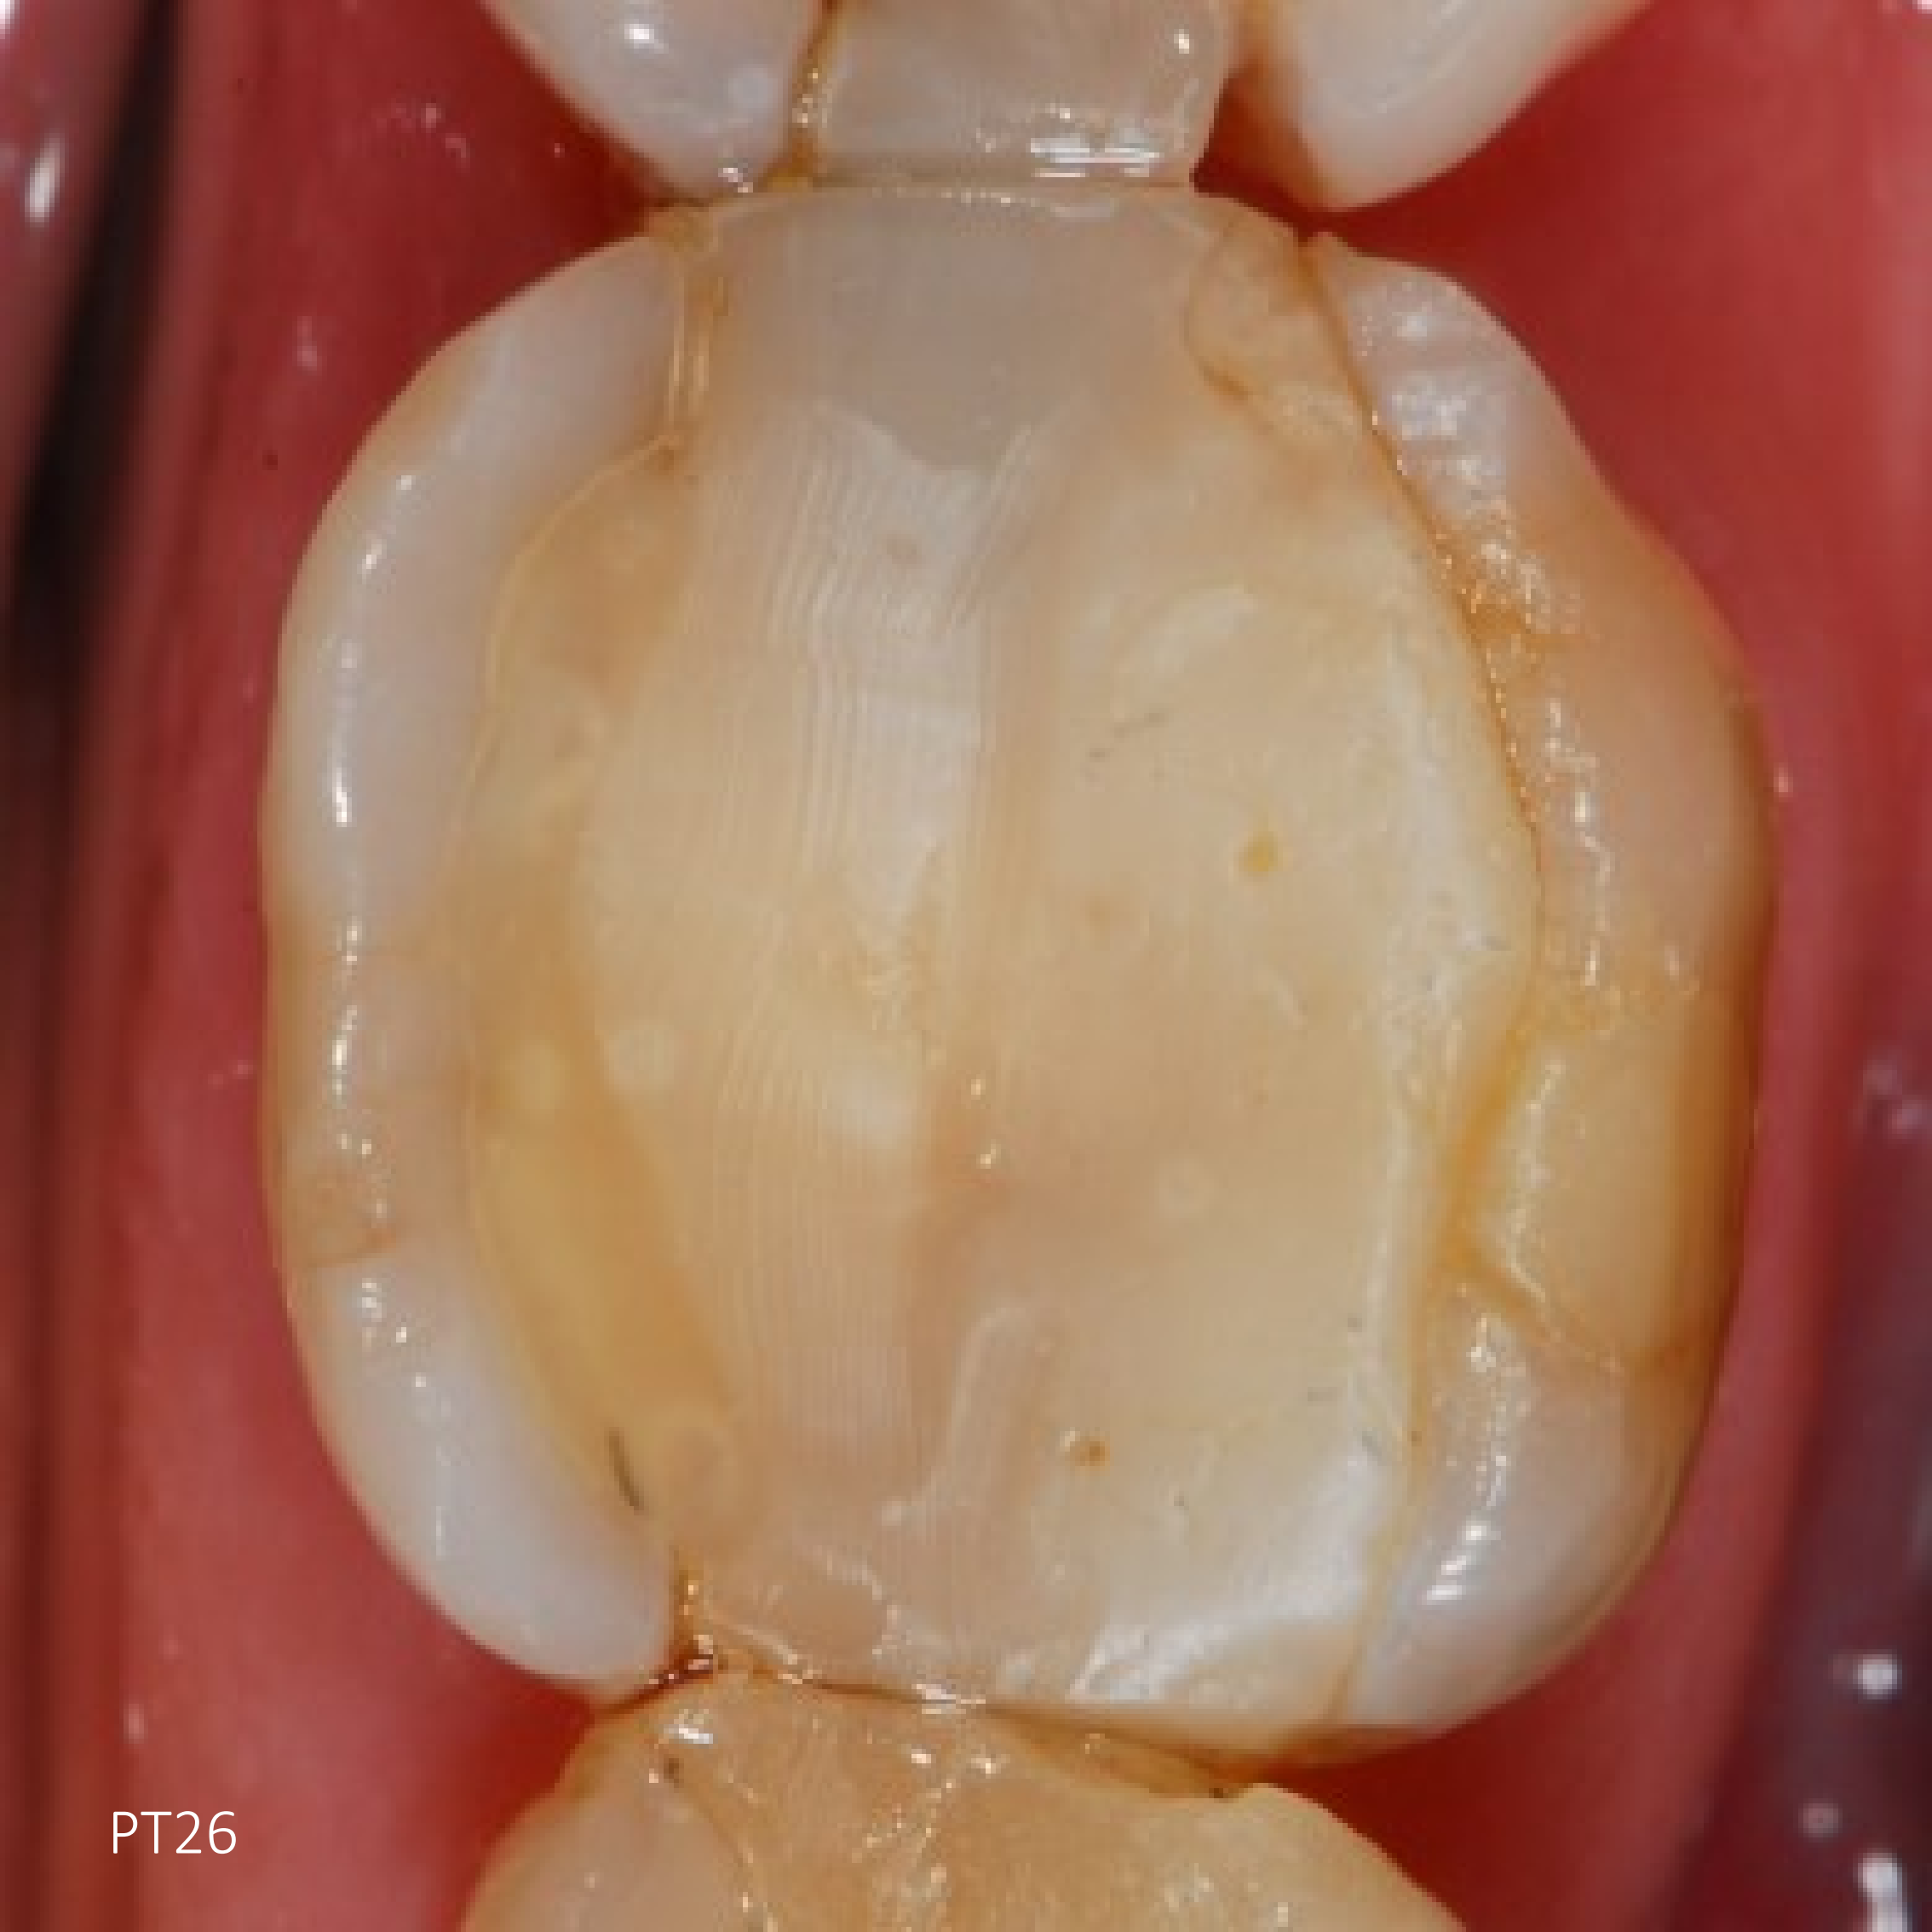

PT26

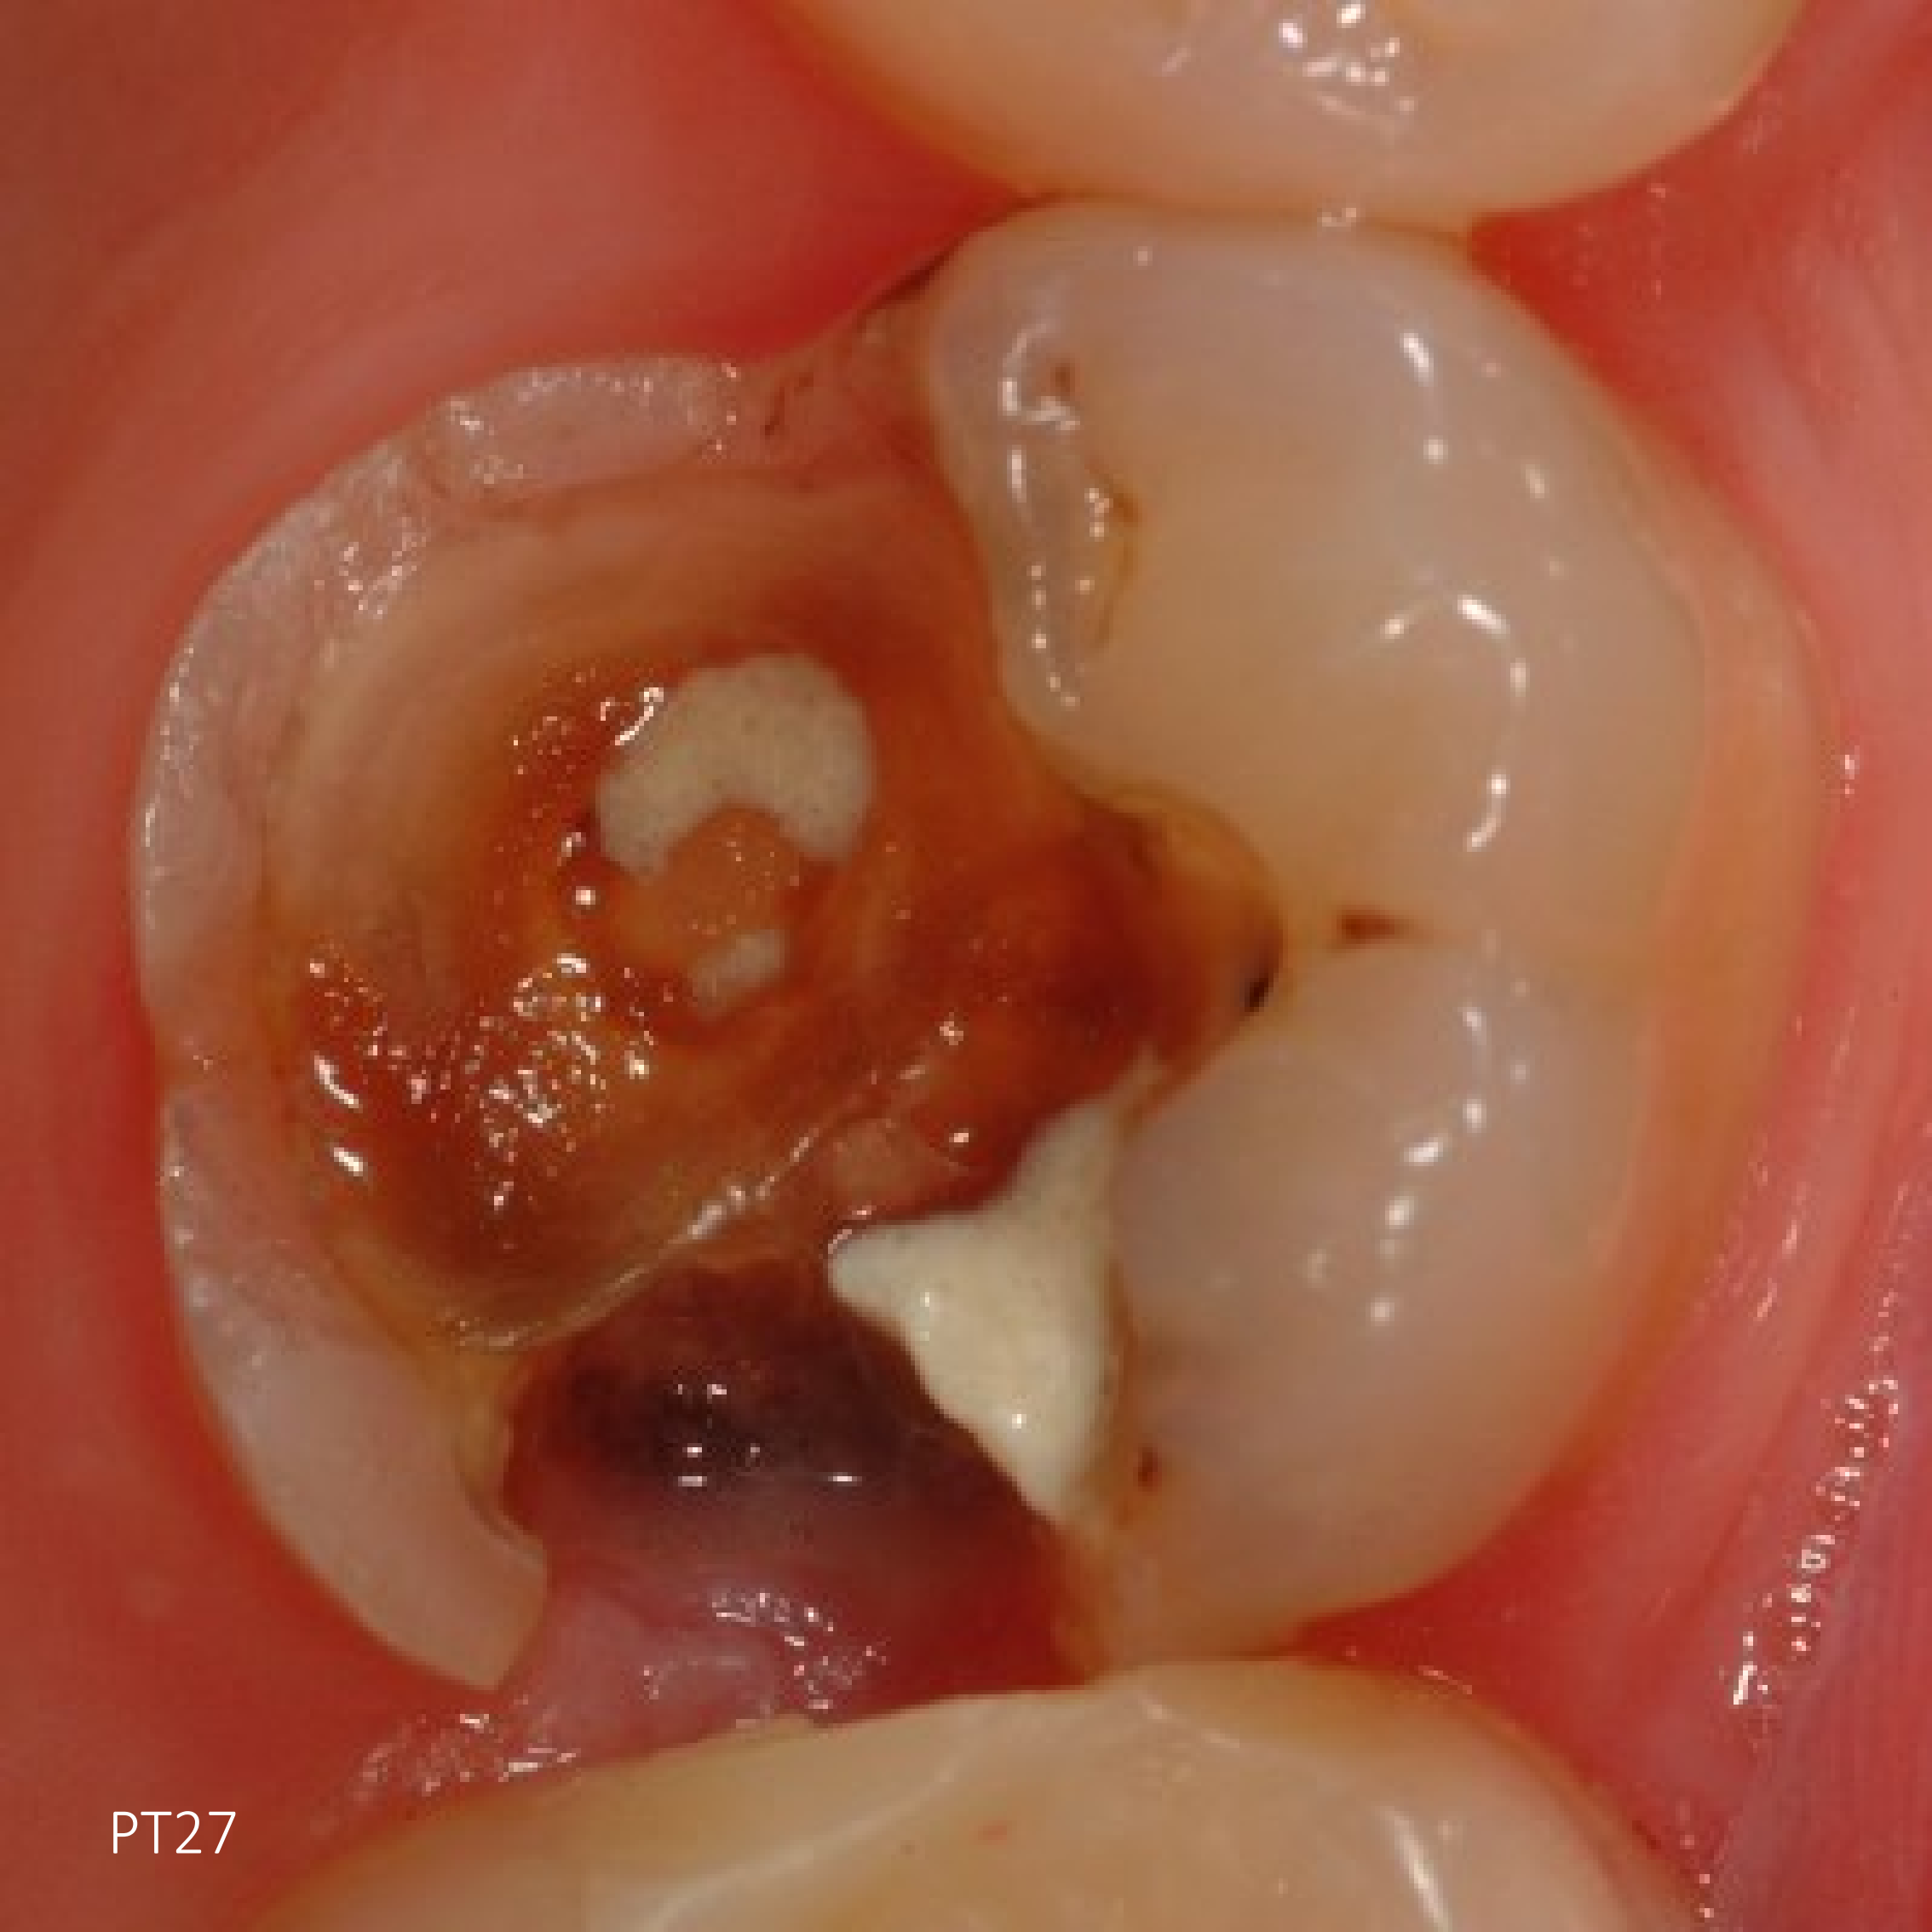

PT27

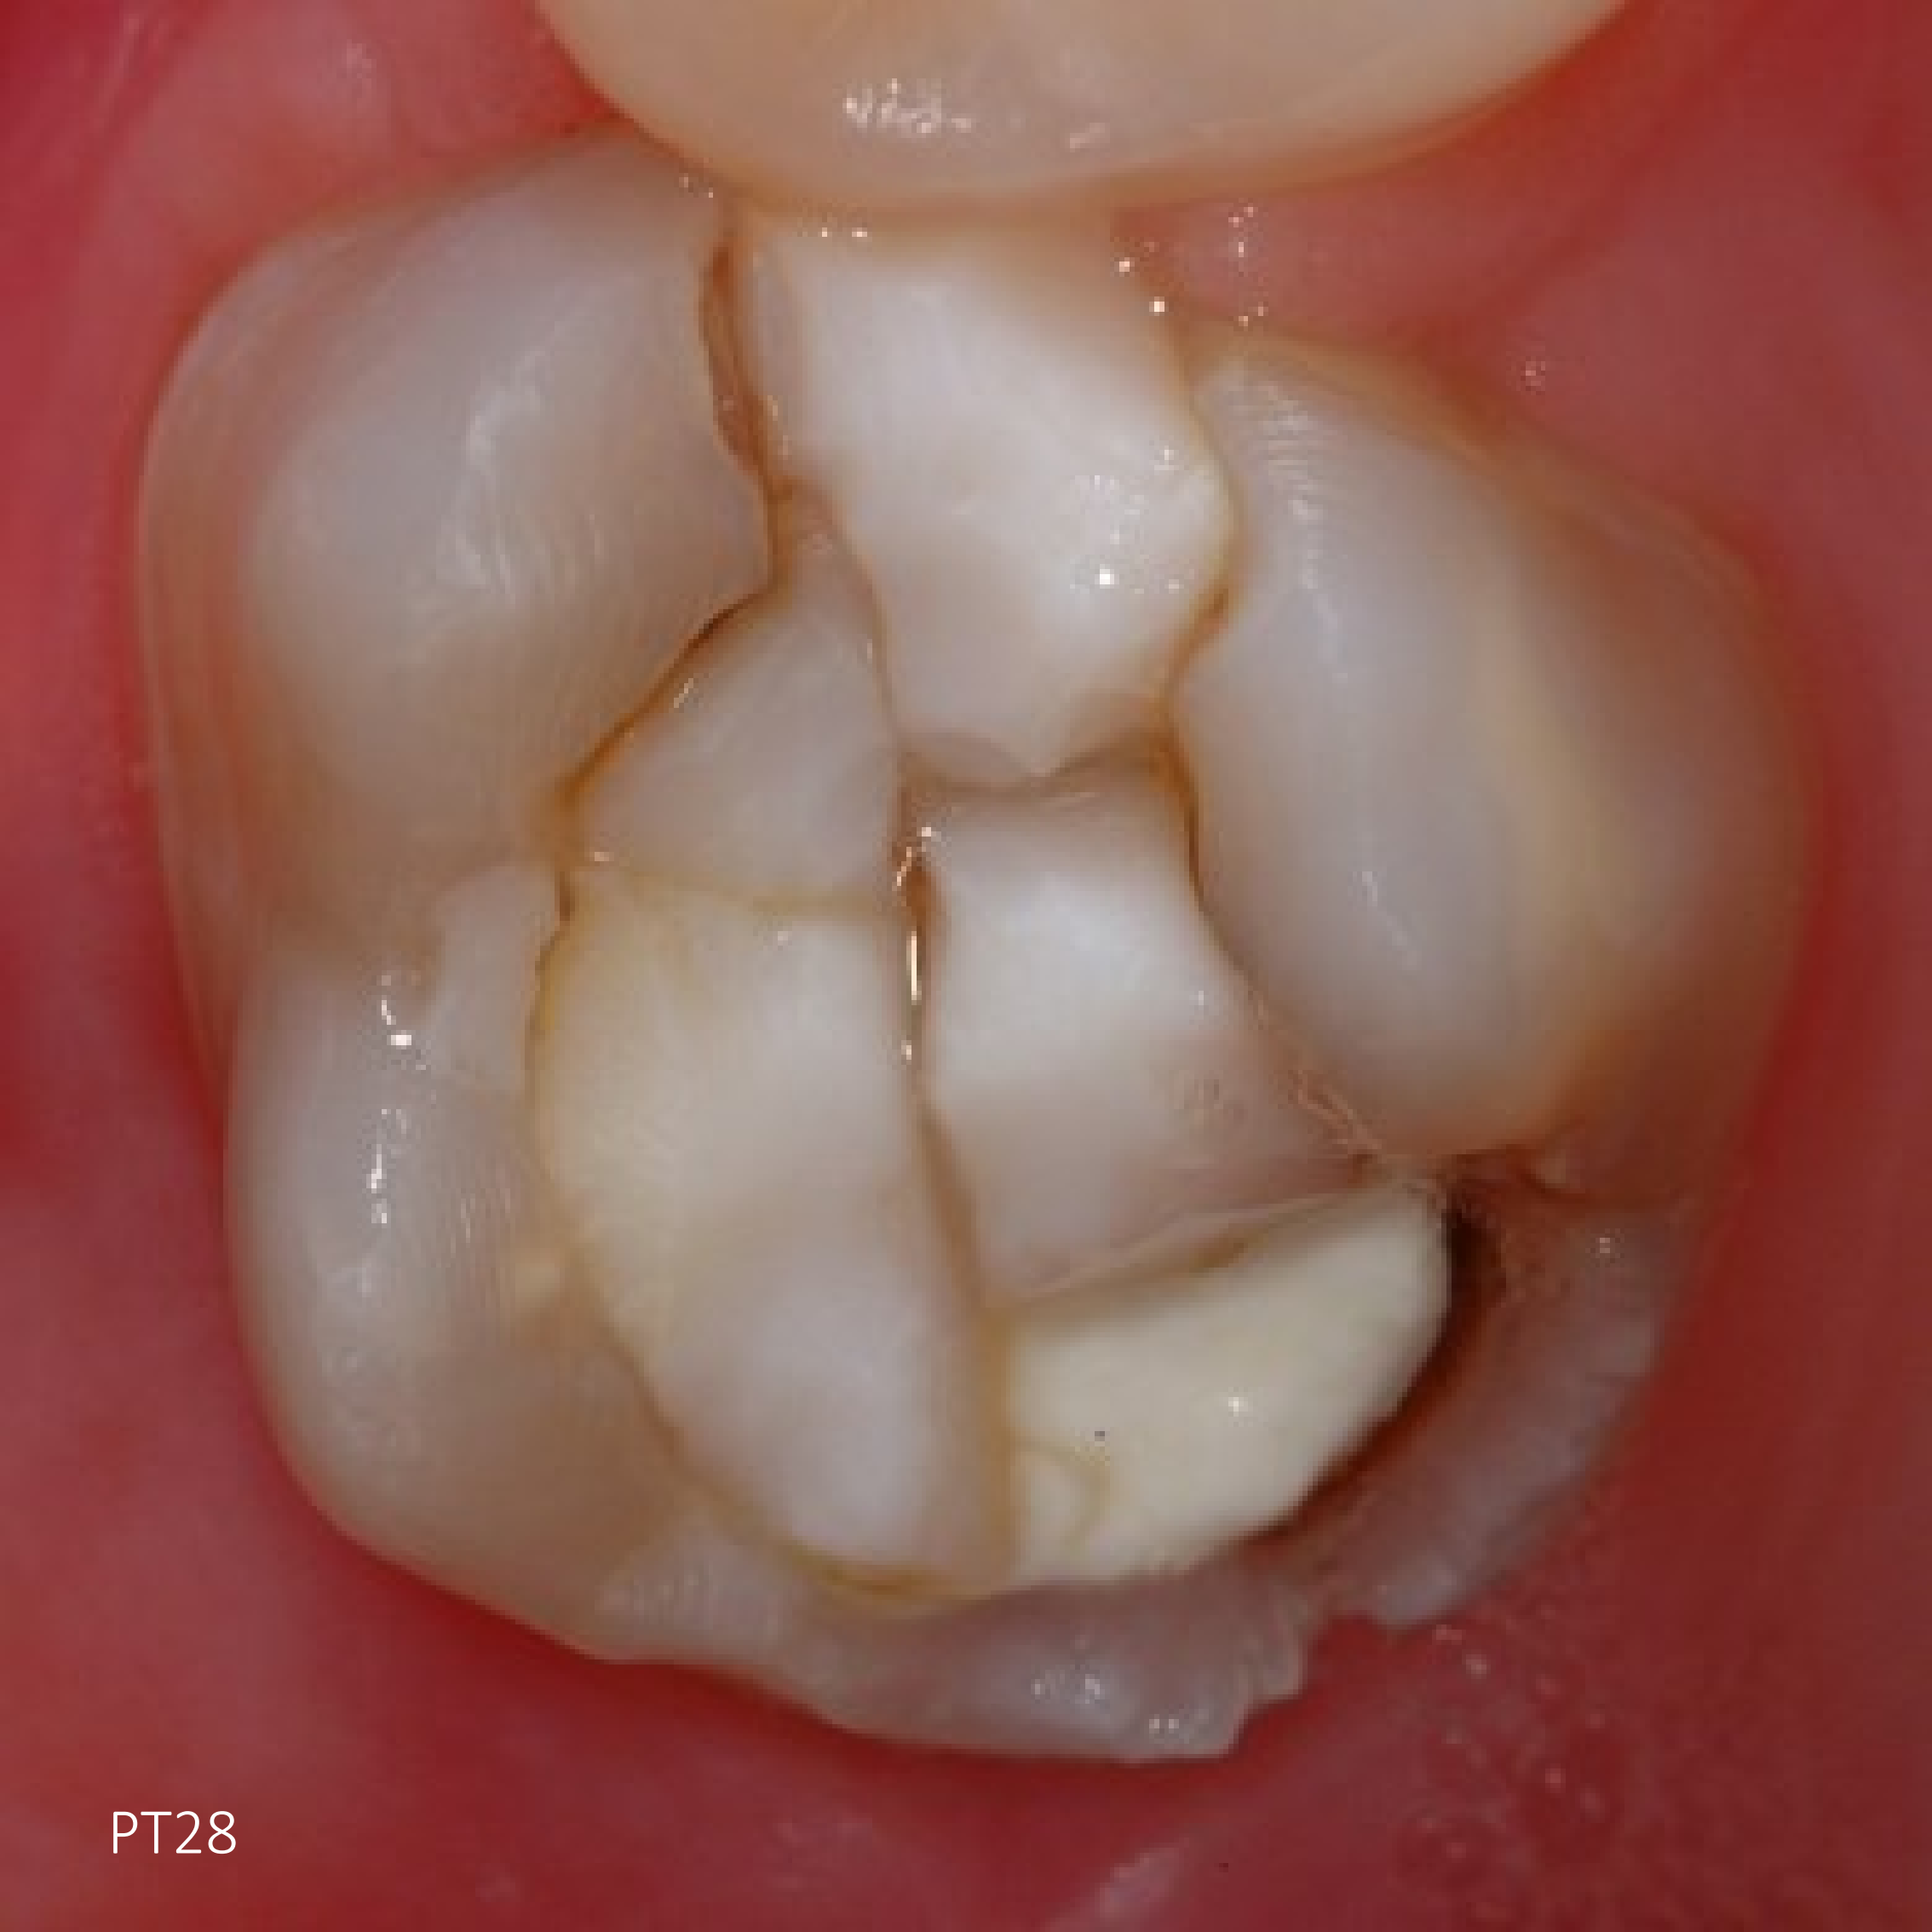

PT28

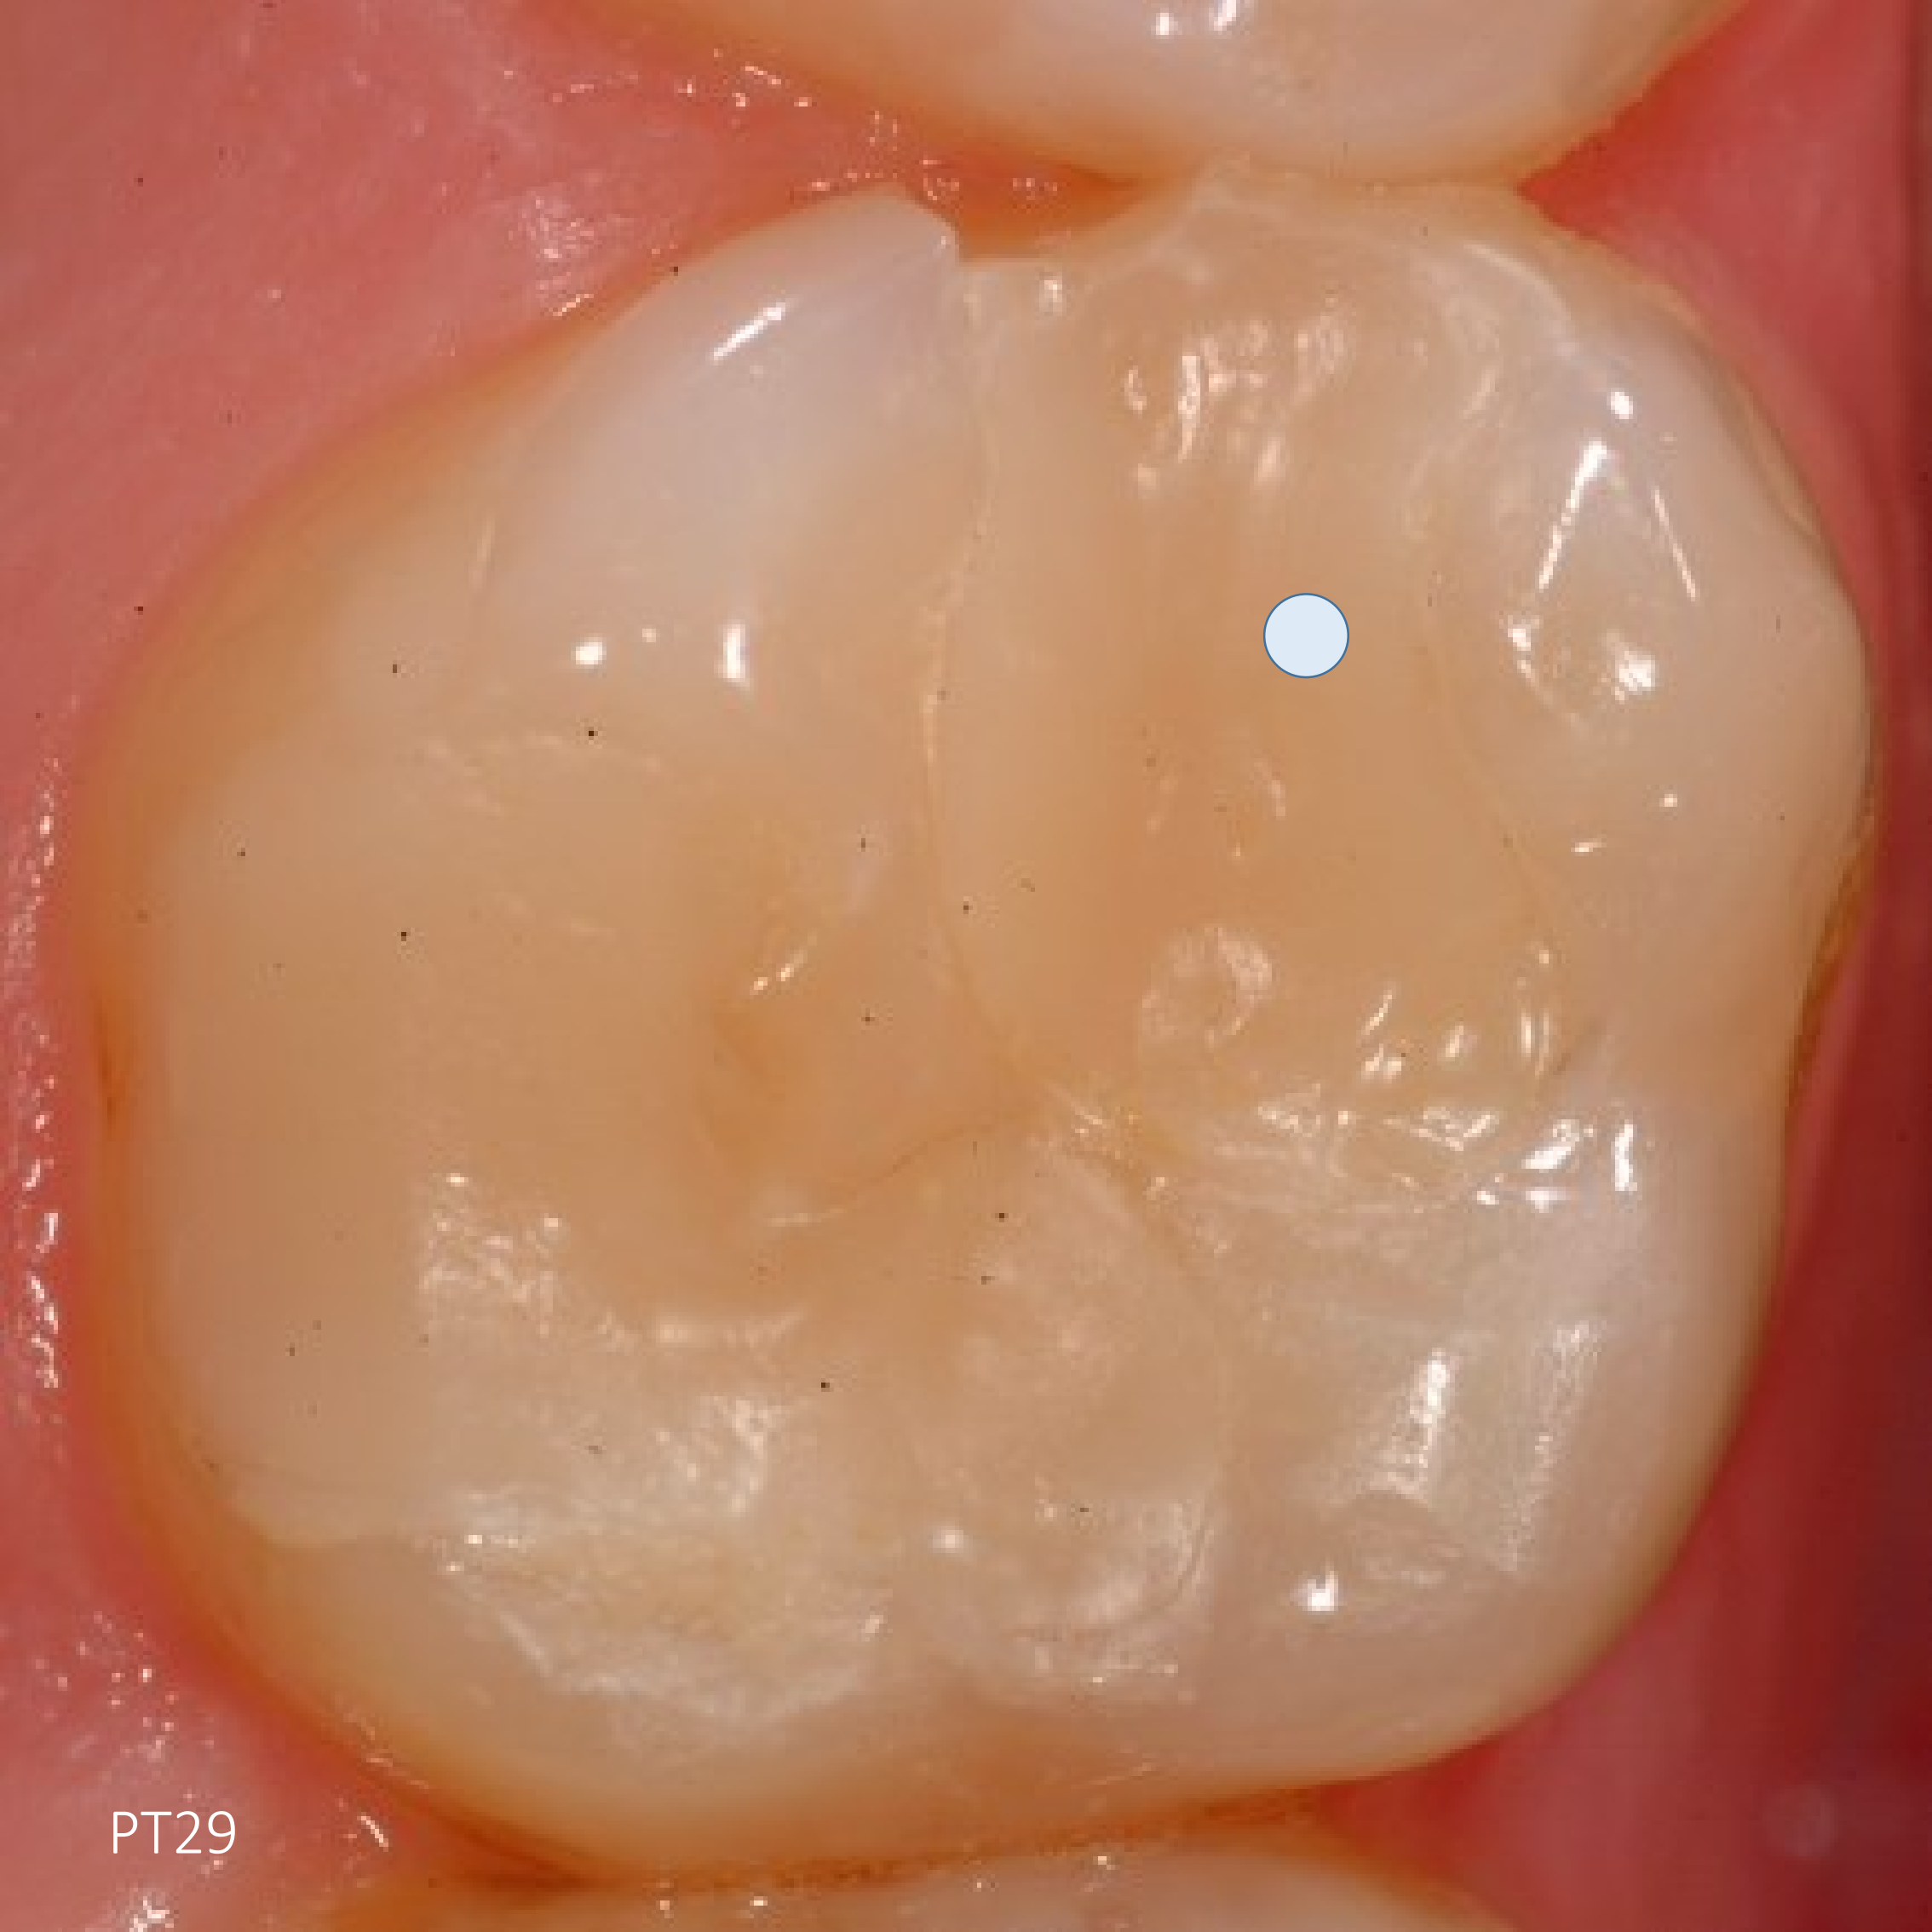

PT29

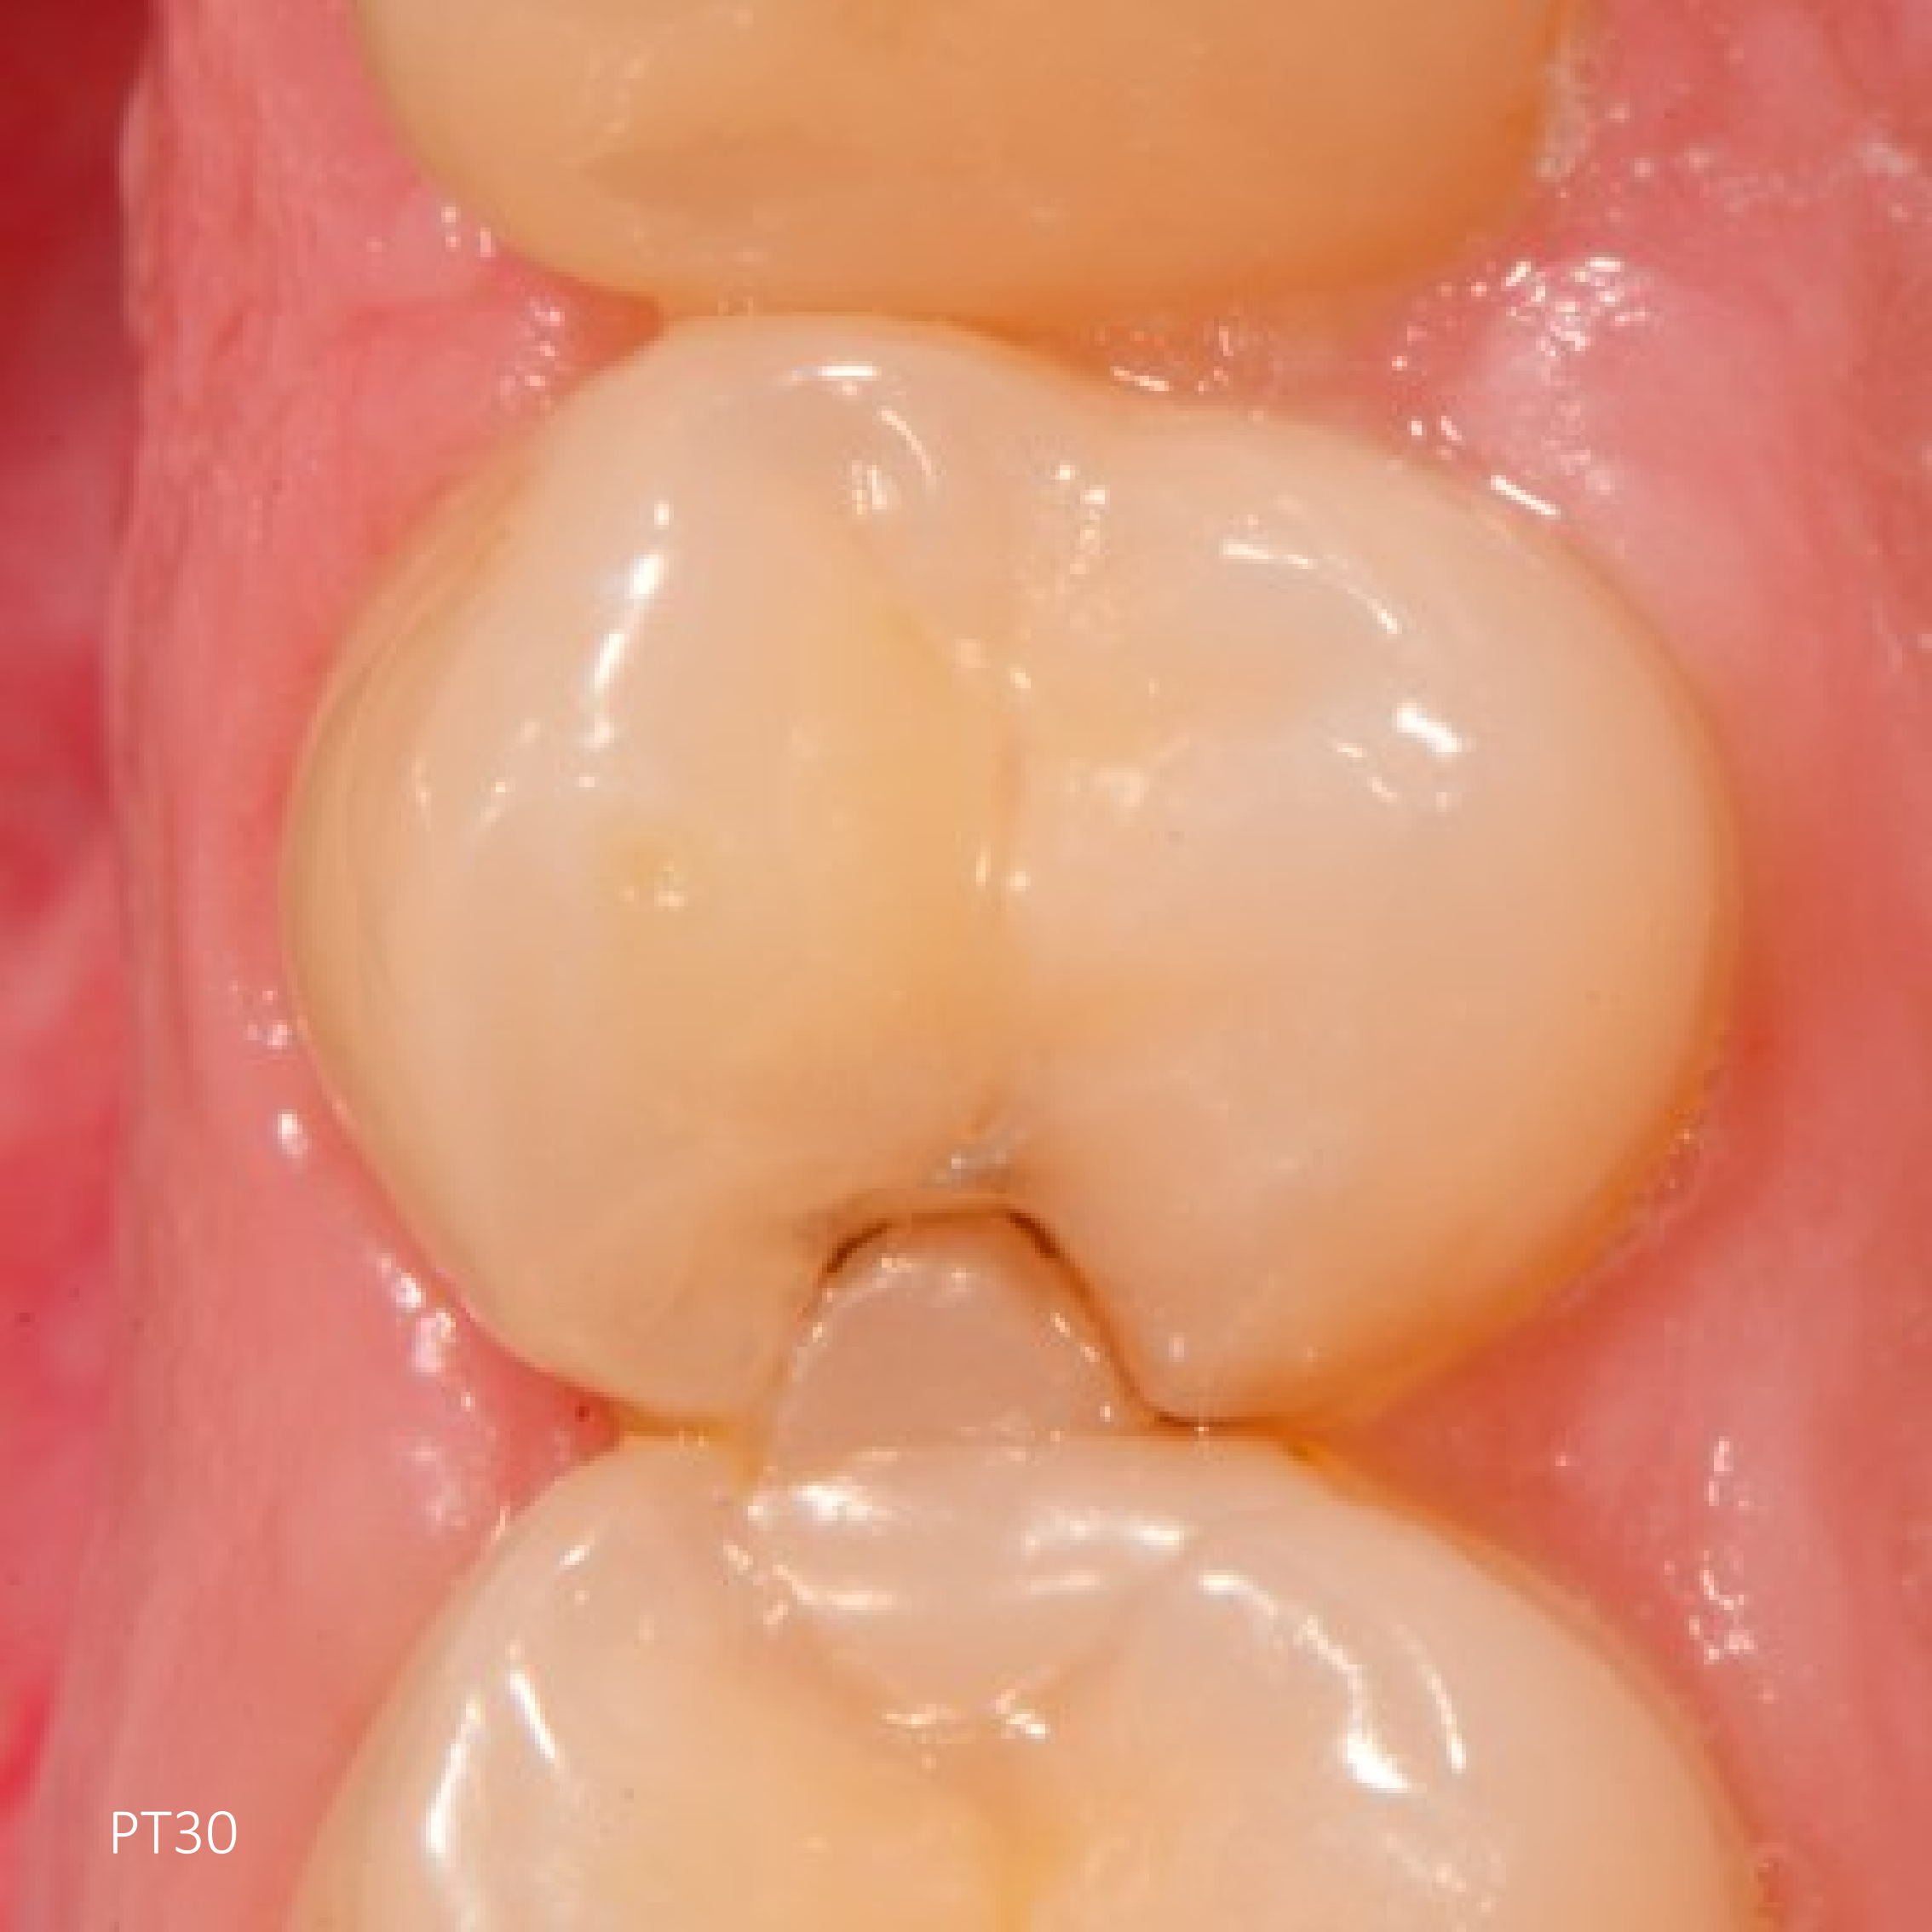

PT30

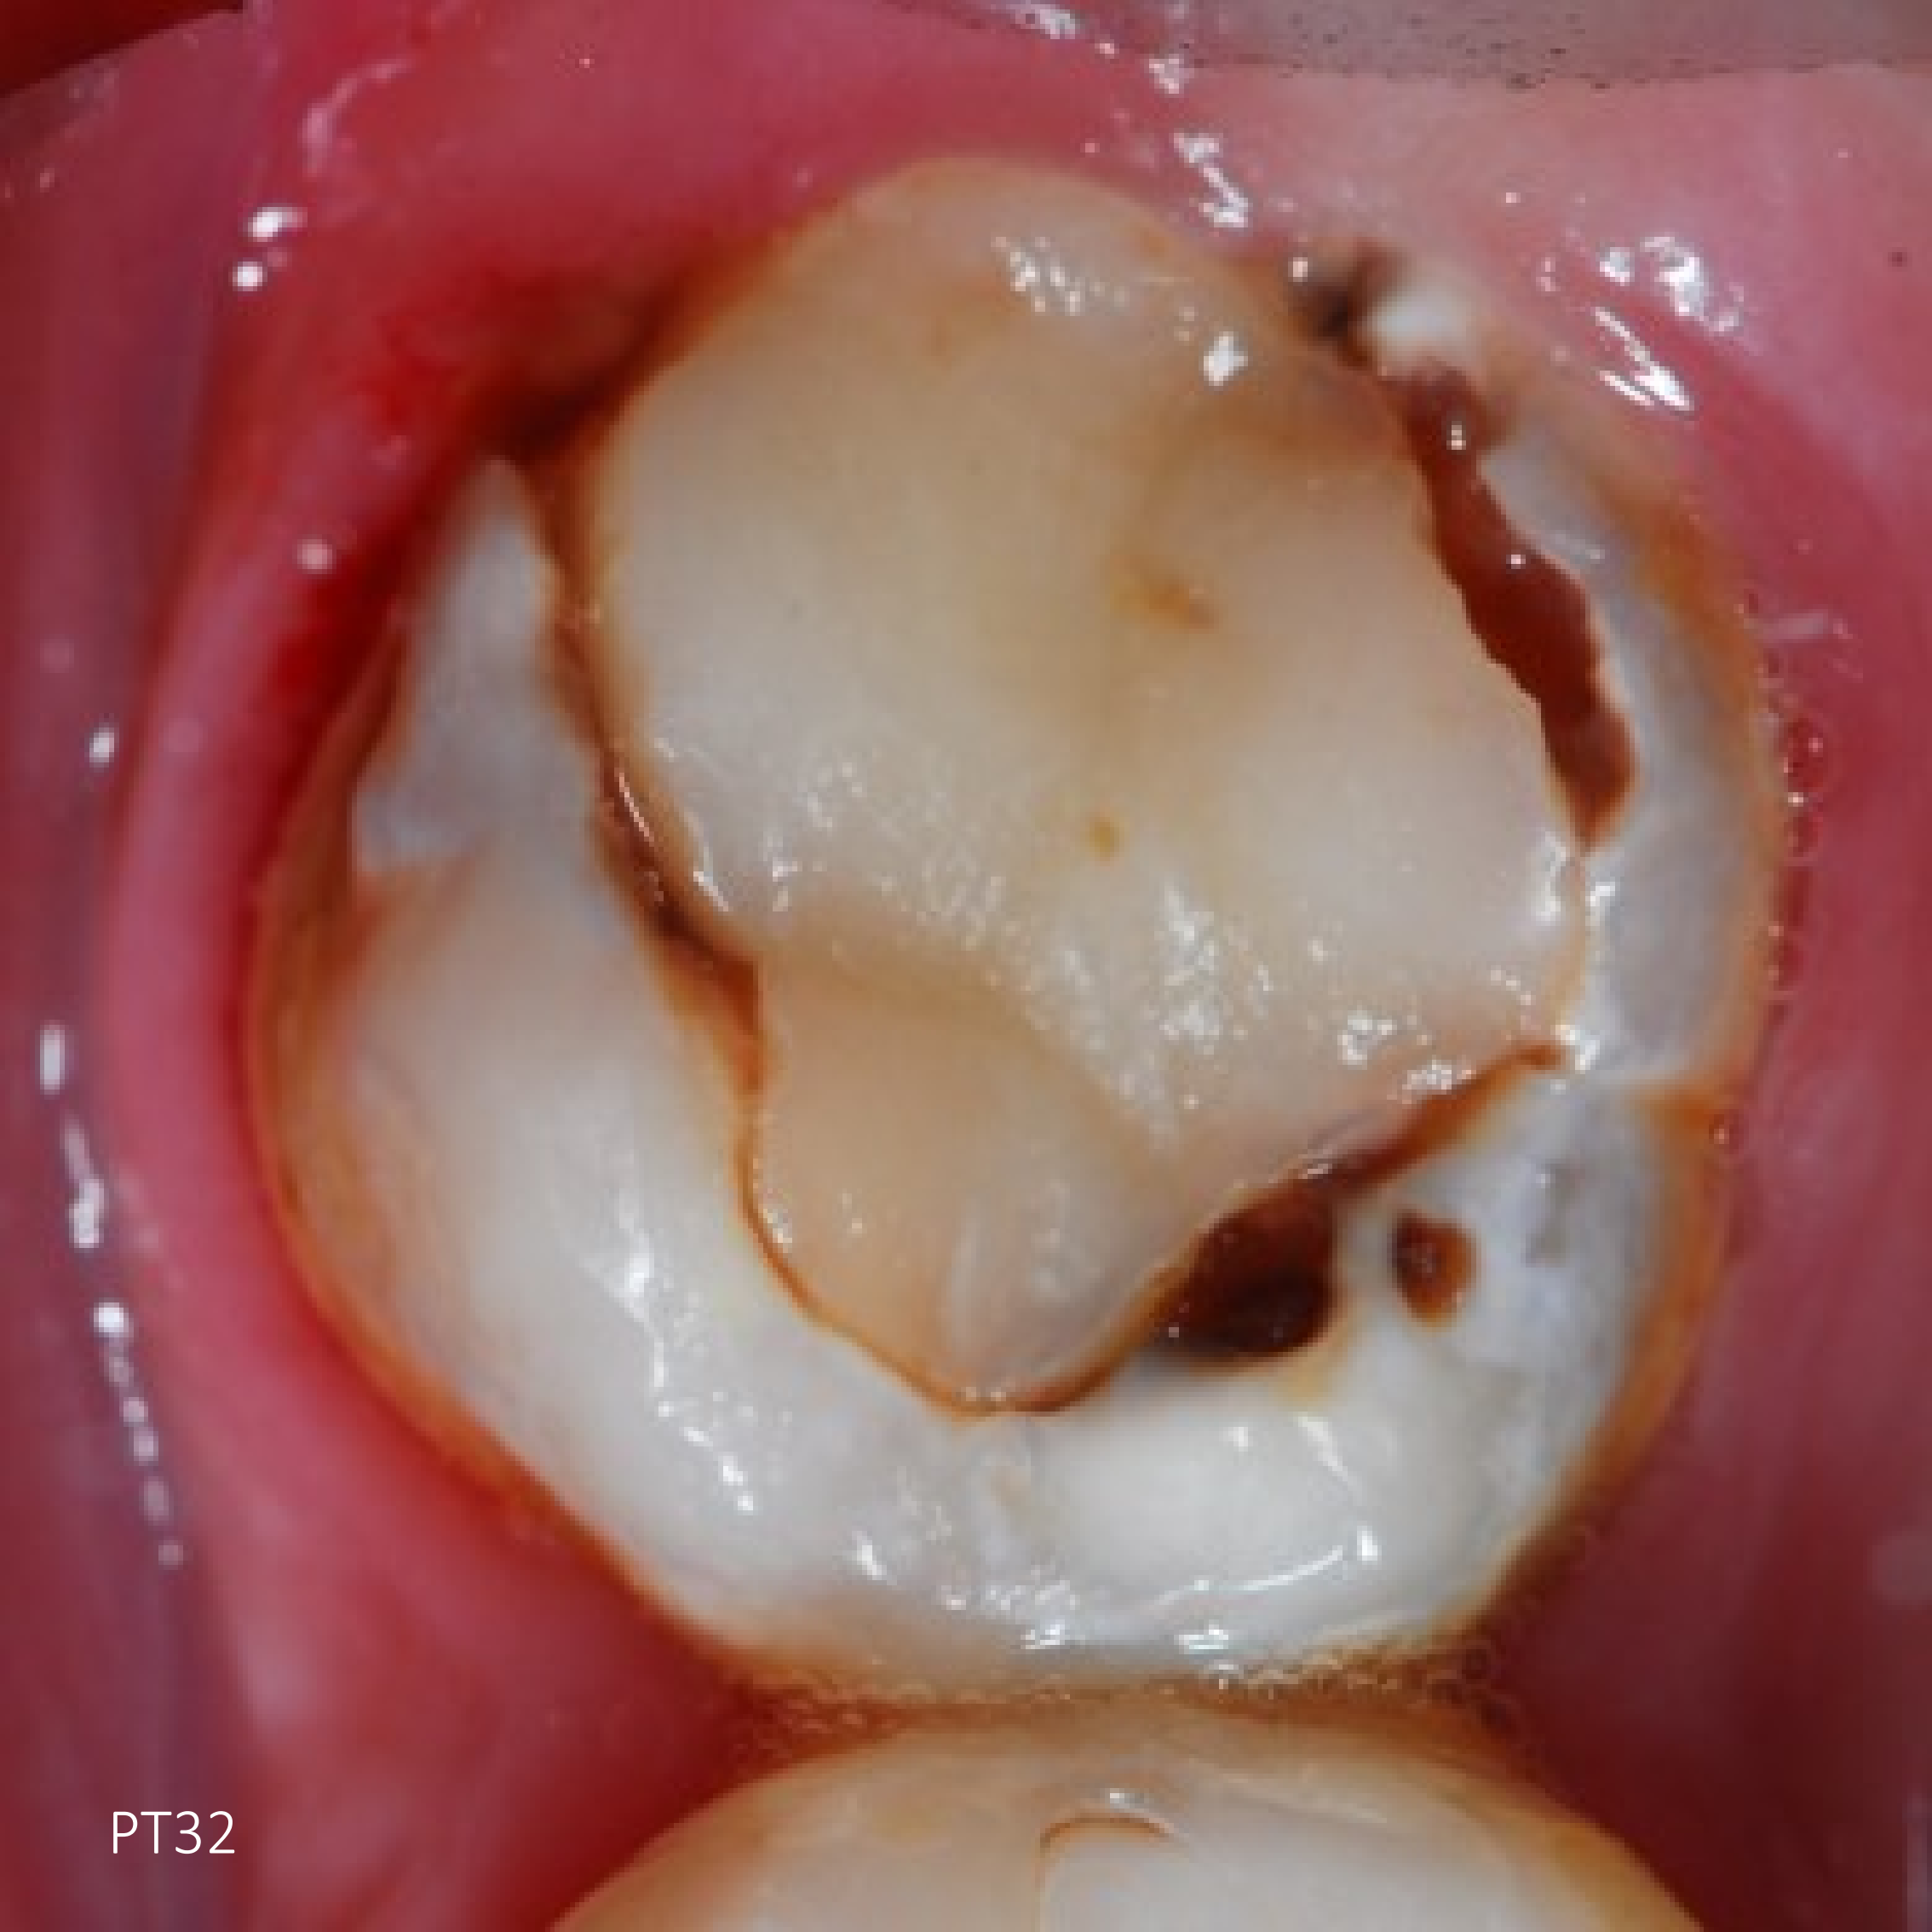

PT32

PT34

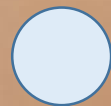

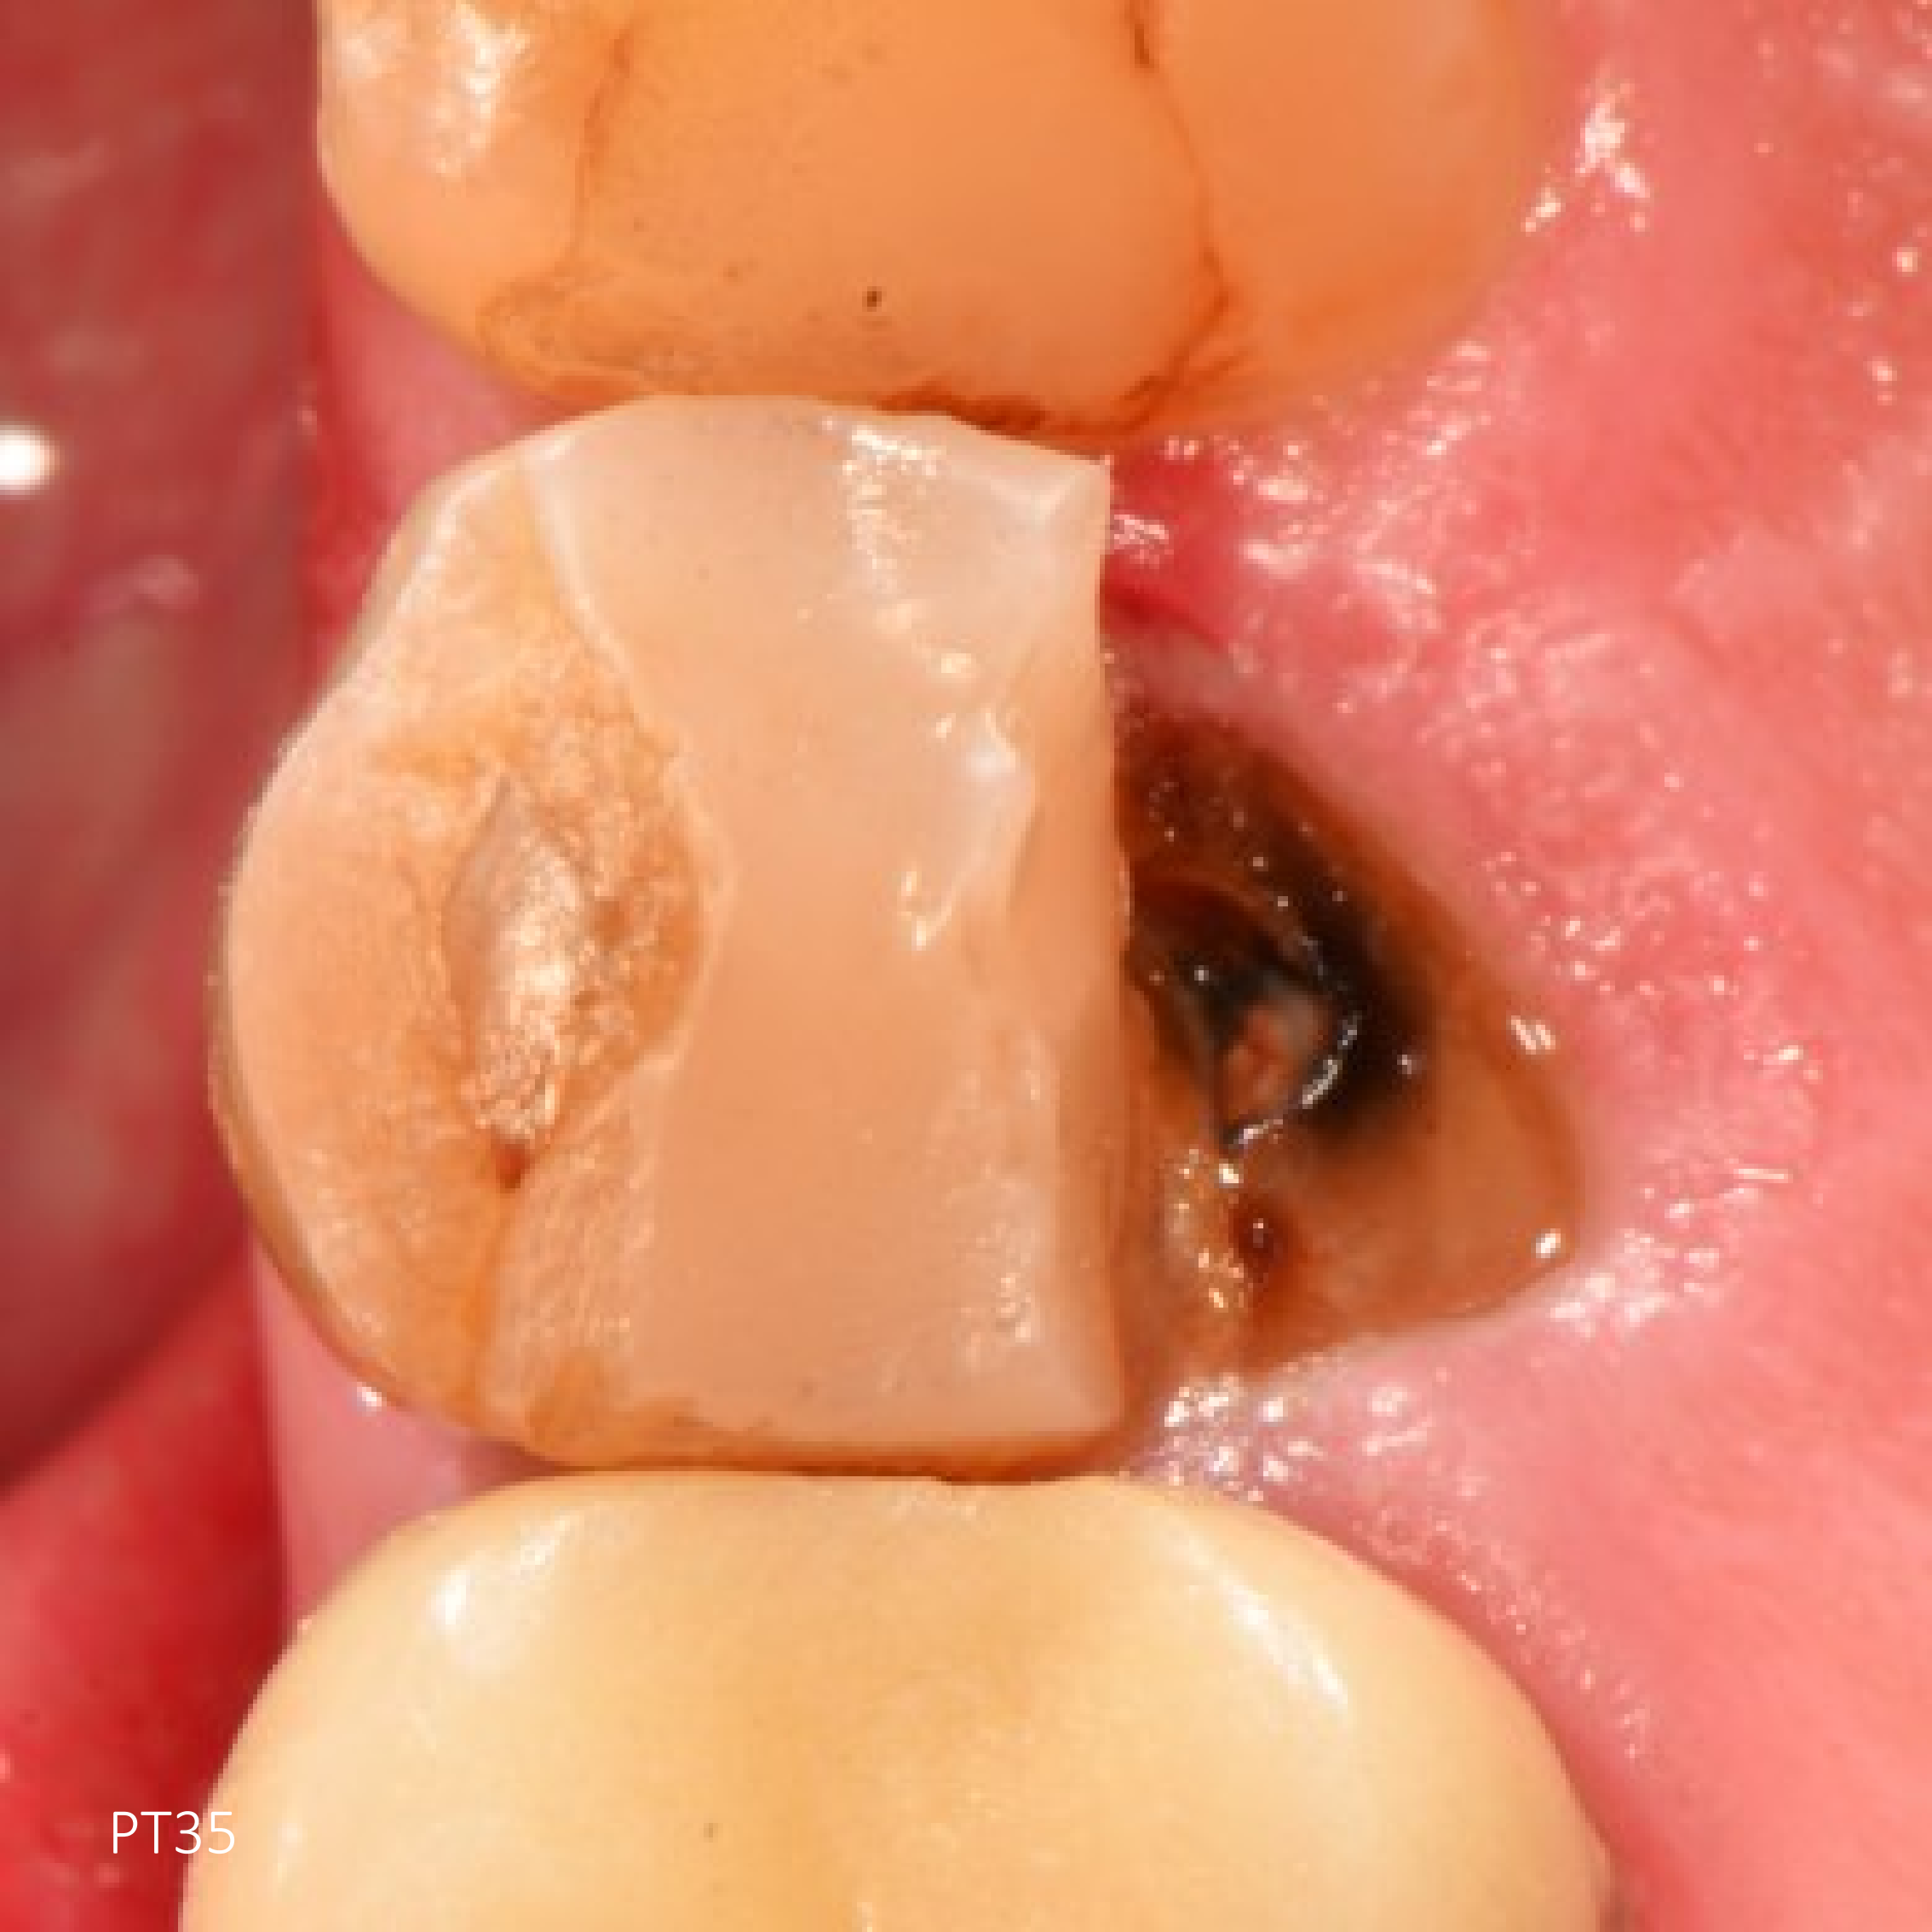

PT35



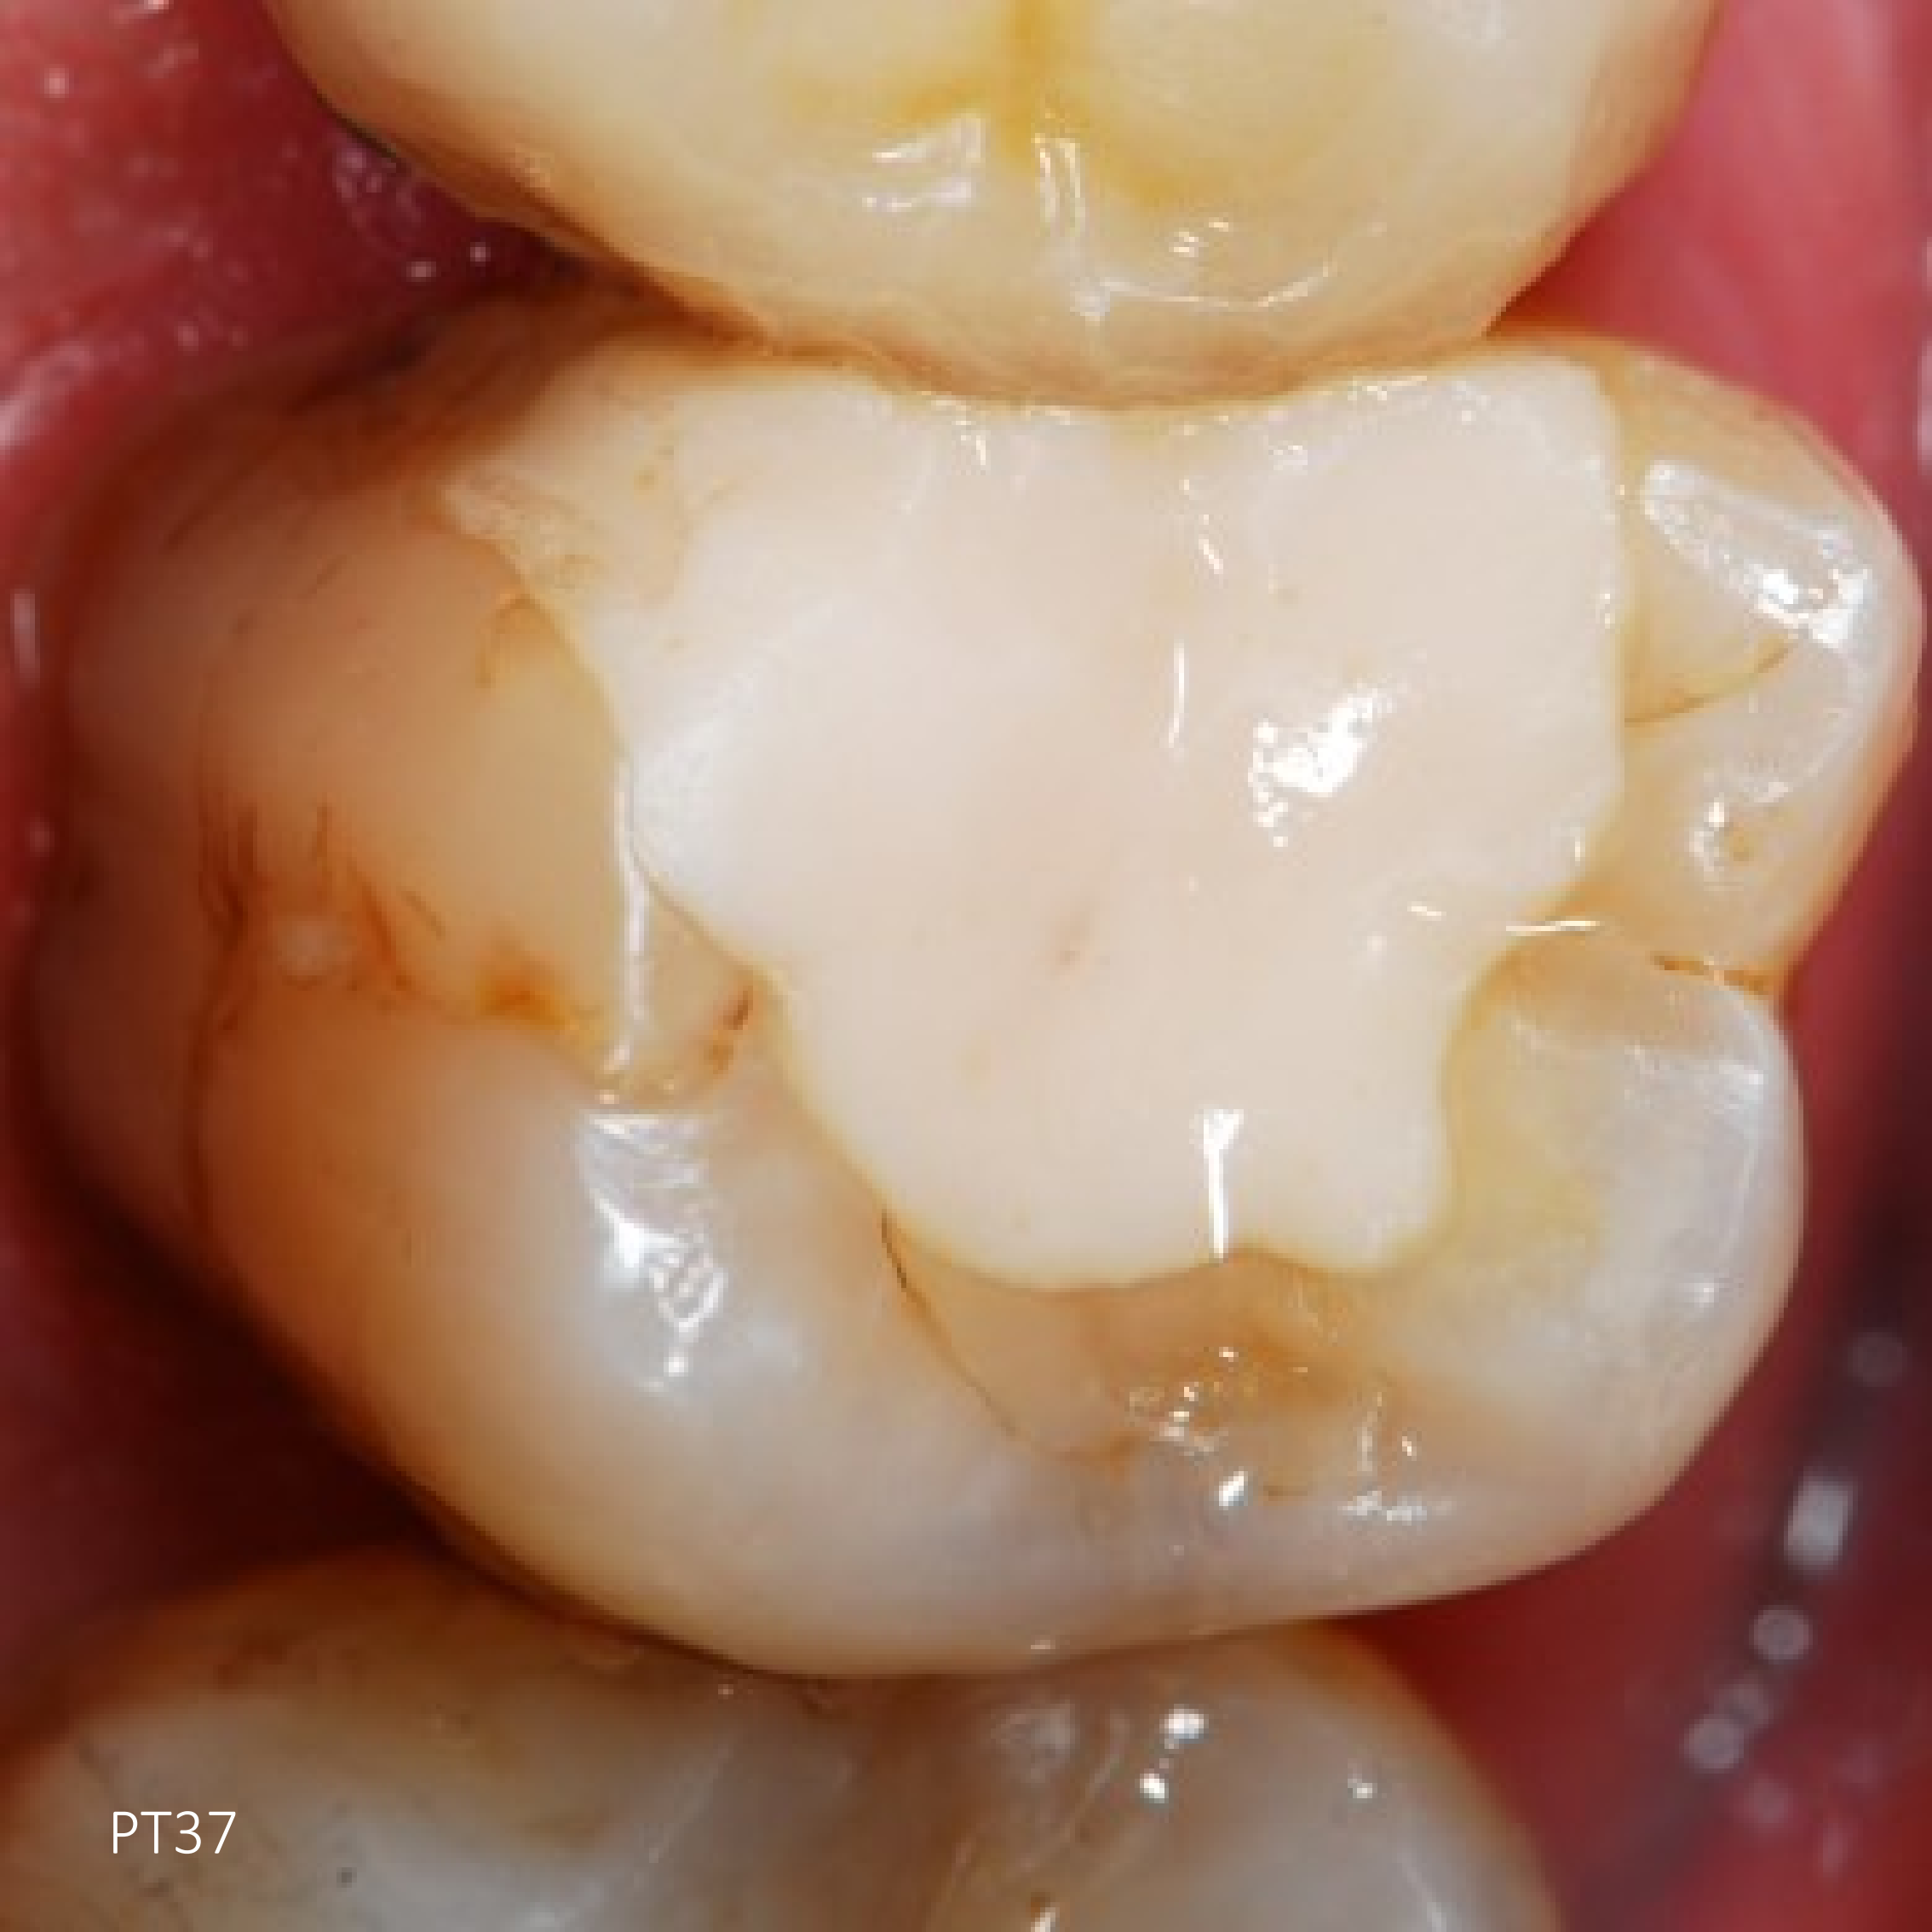

PT37

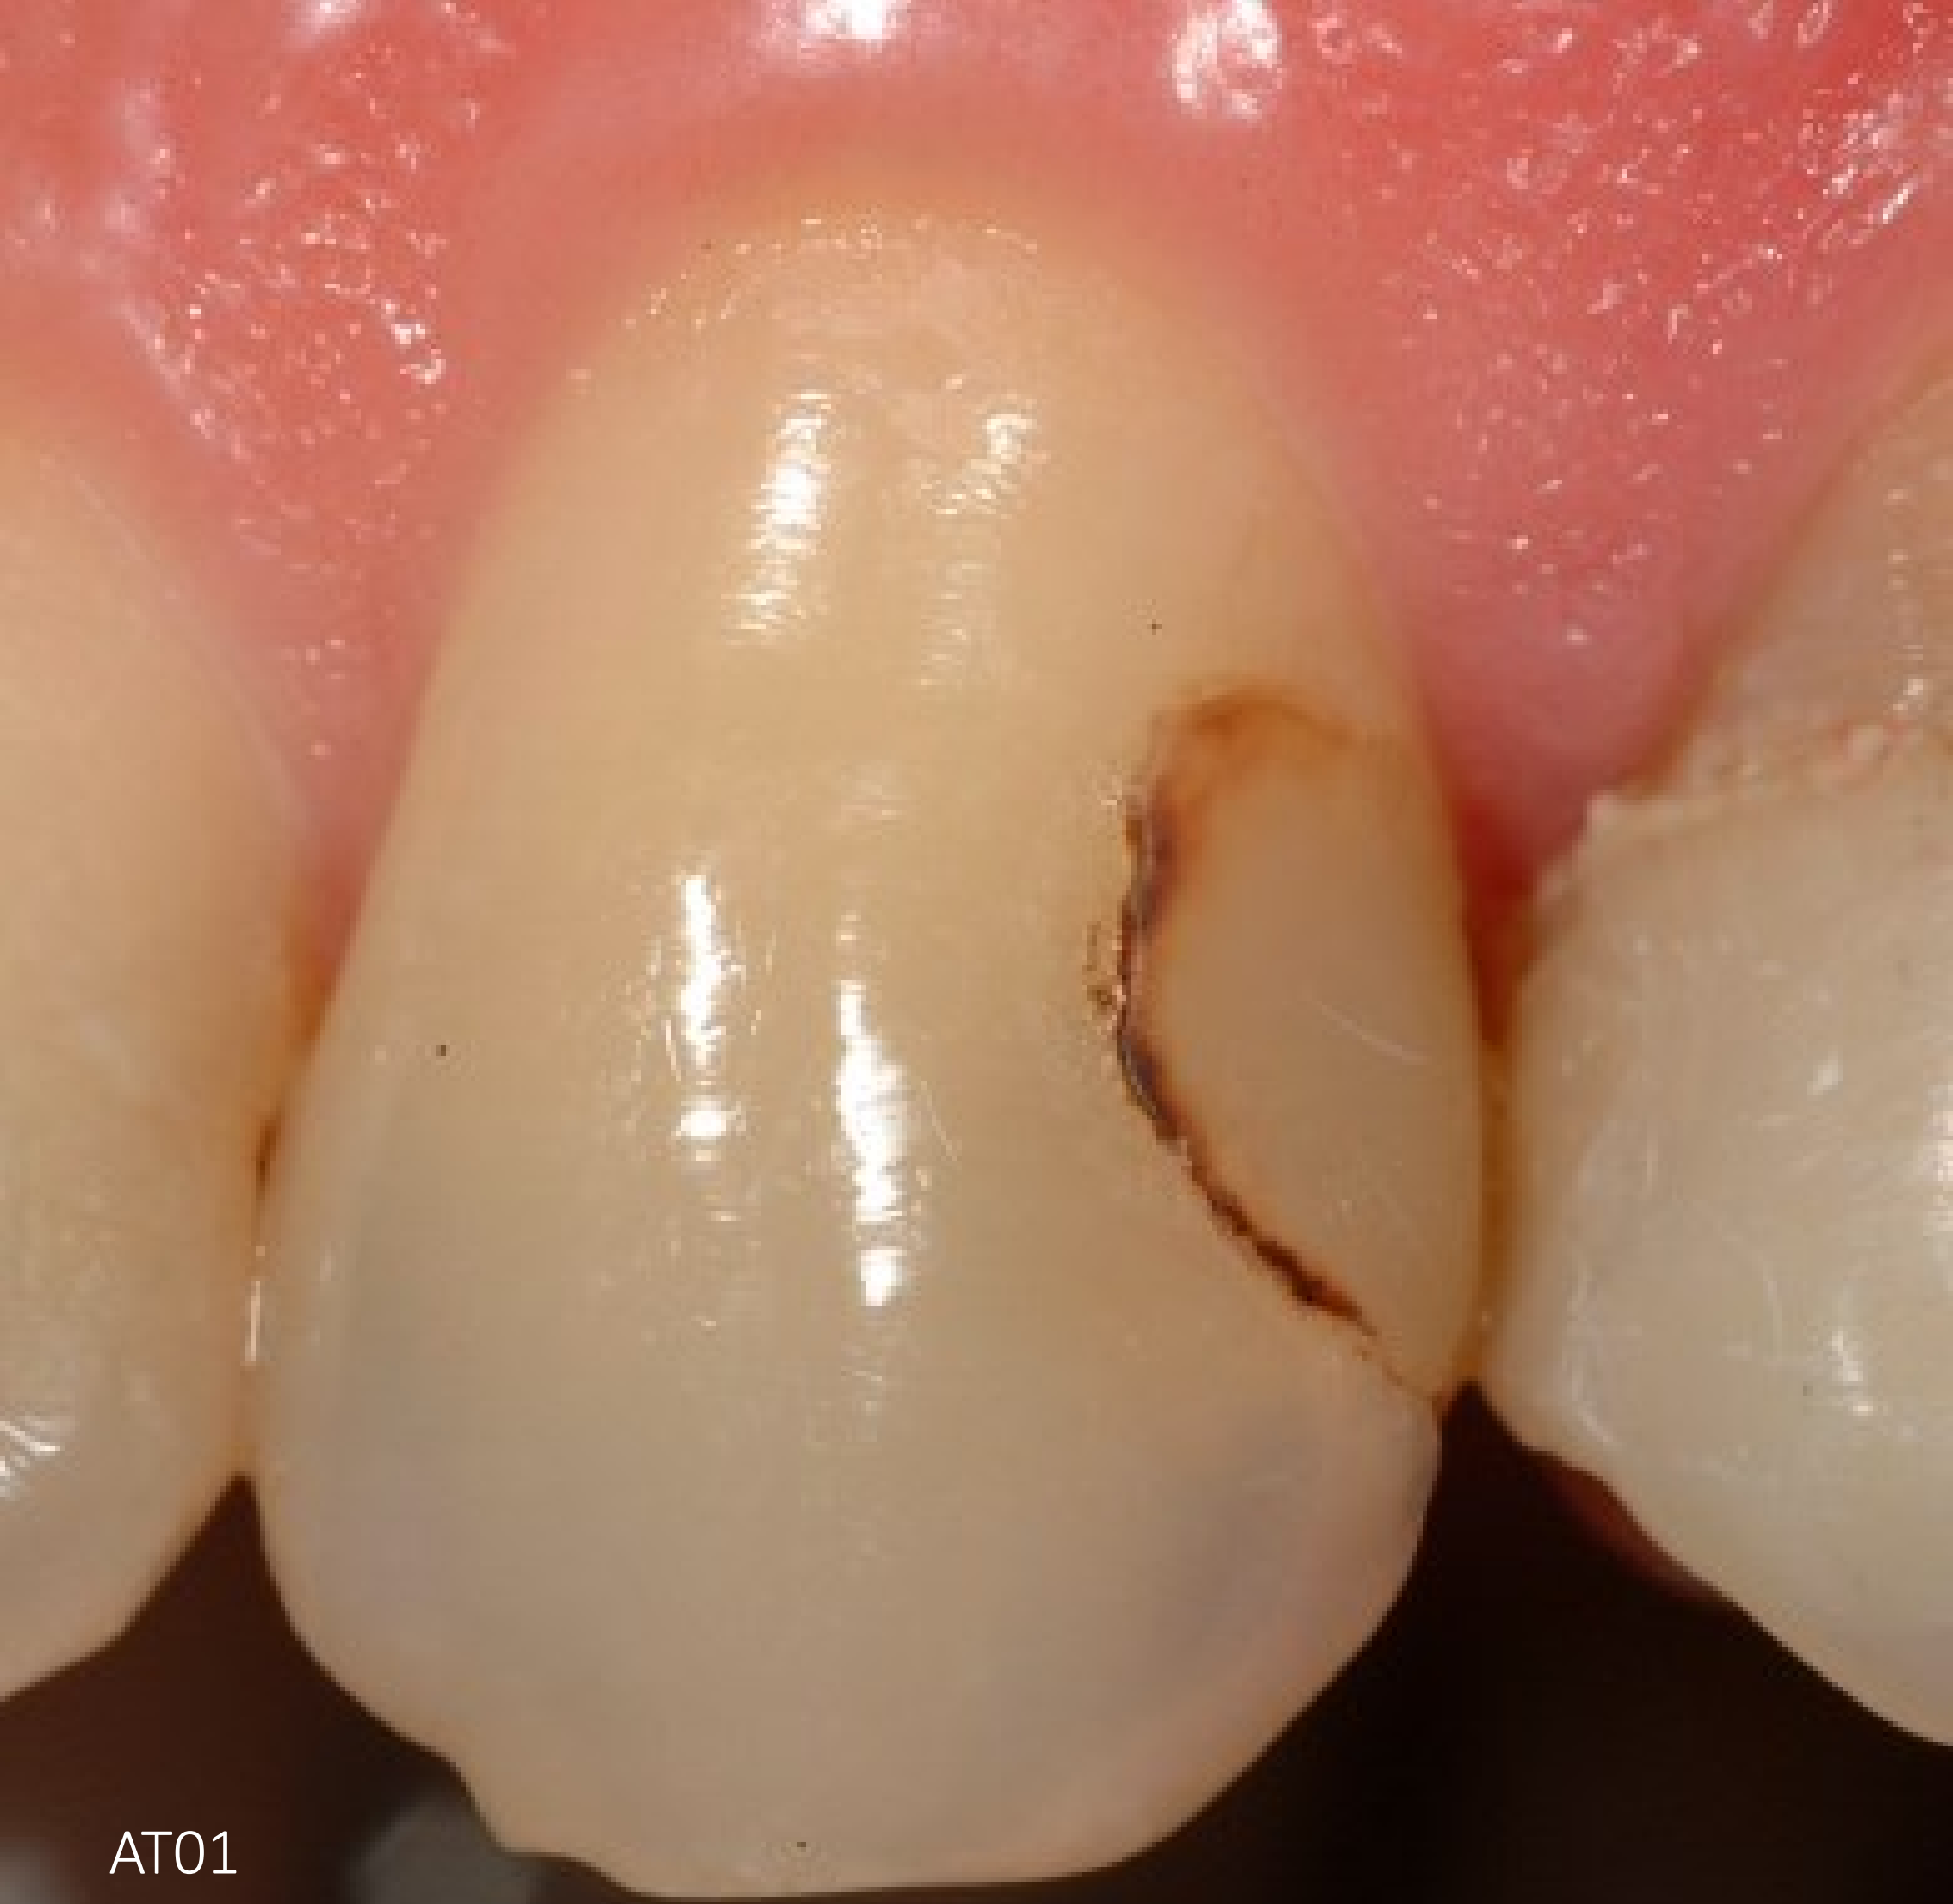

AT01

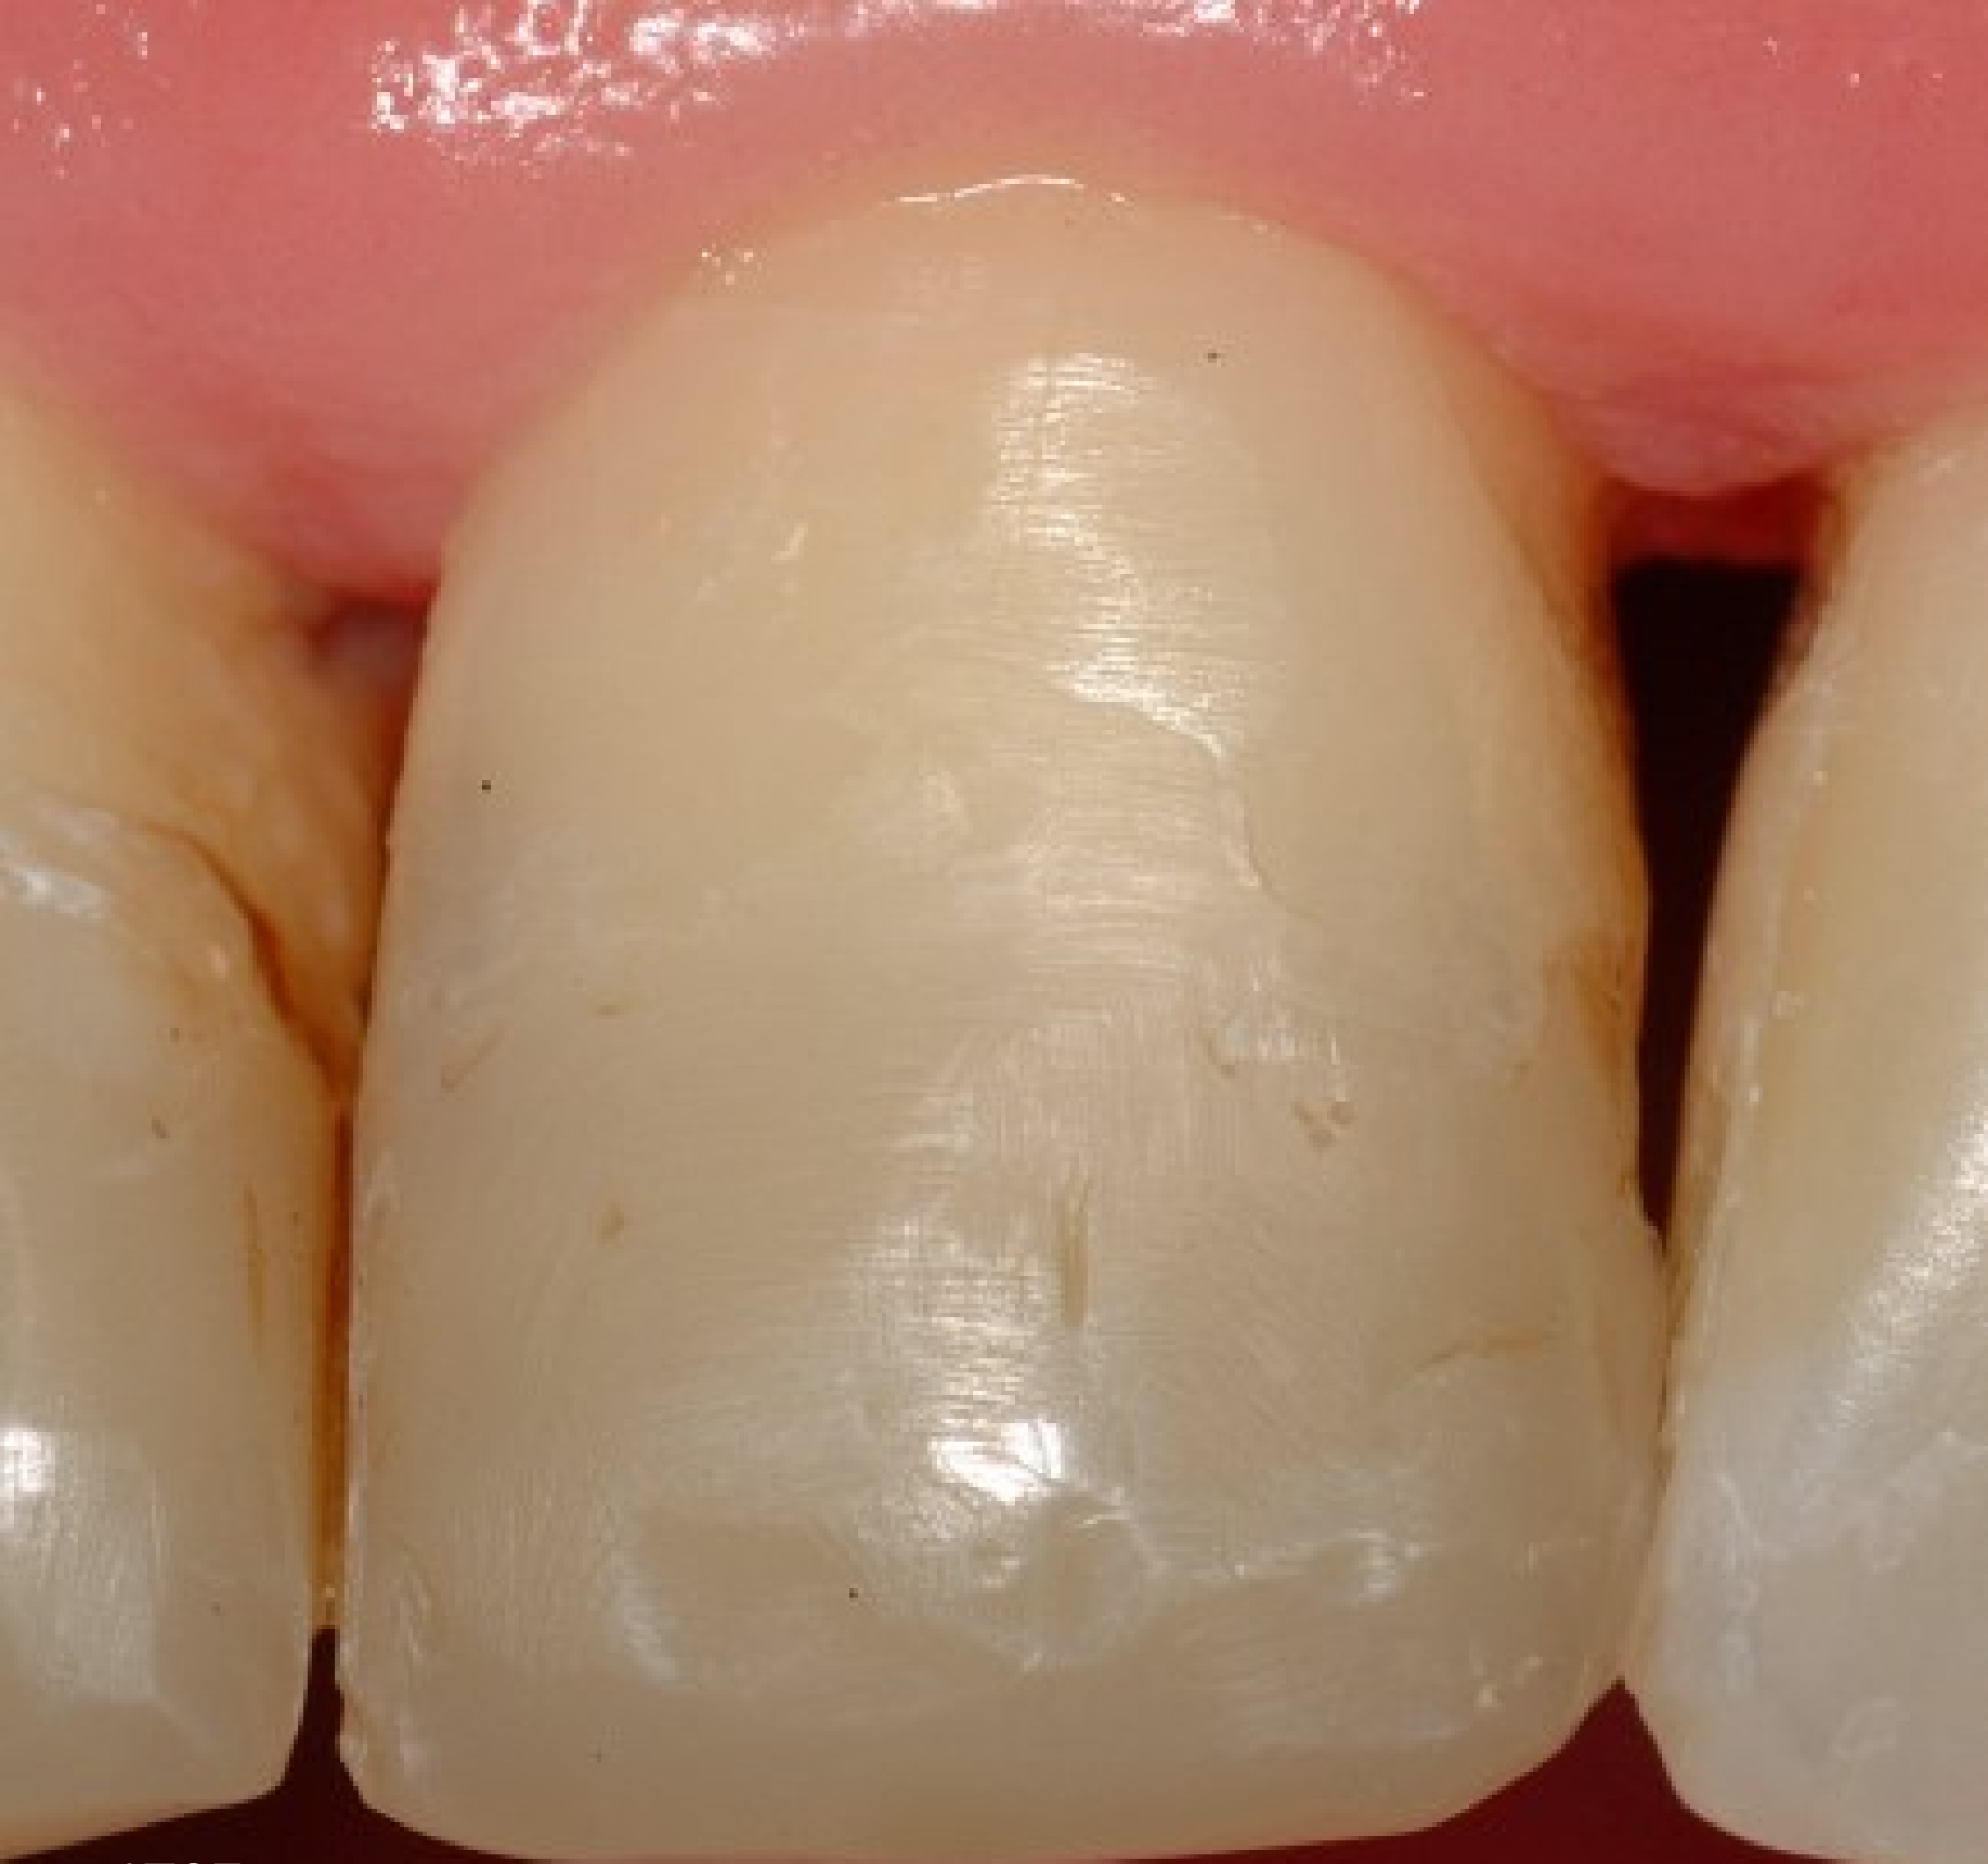

AT07

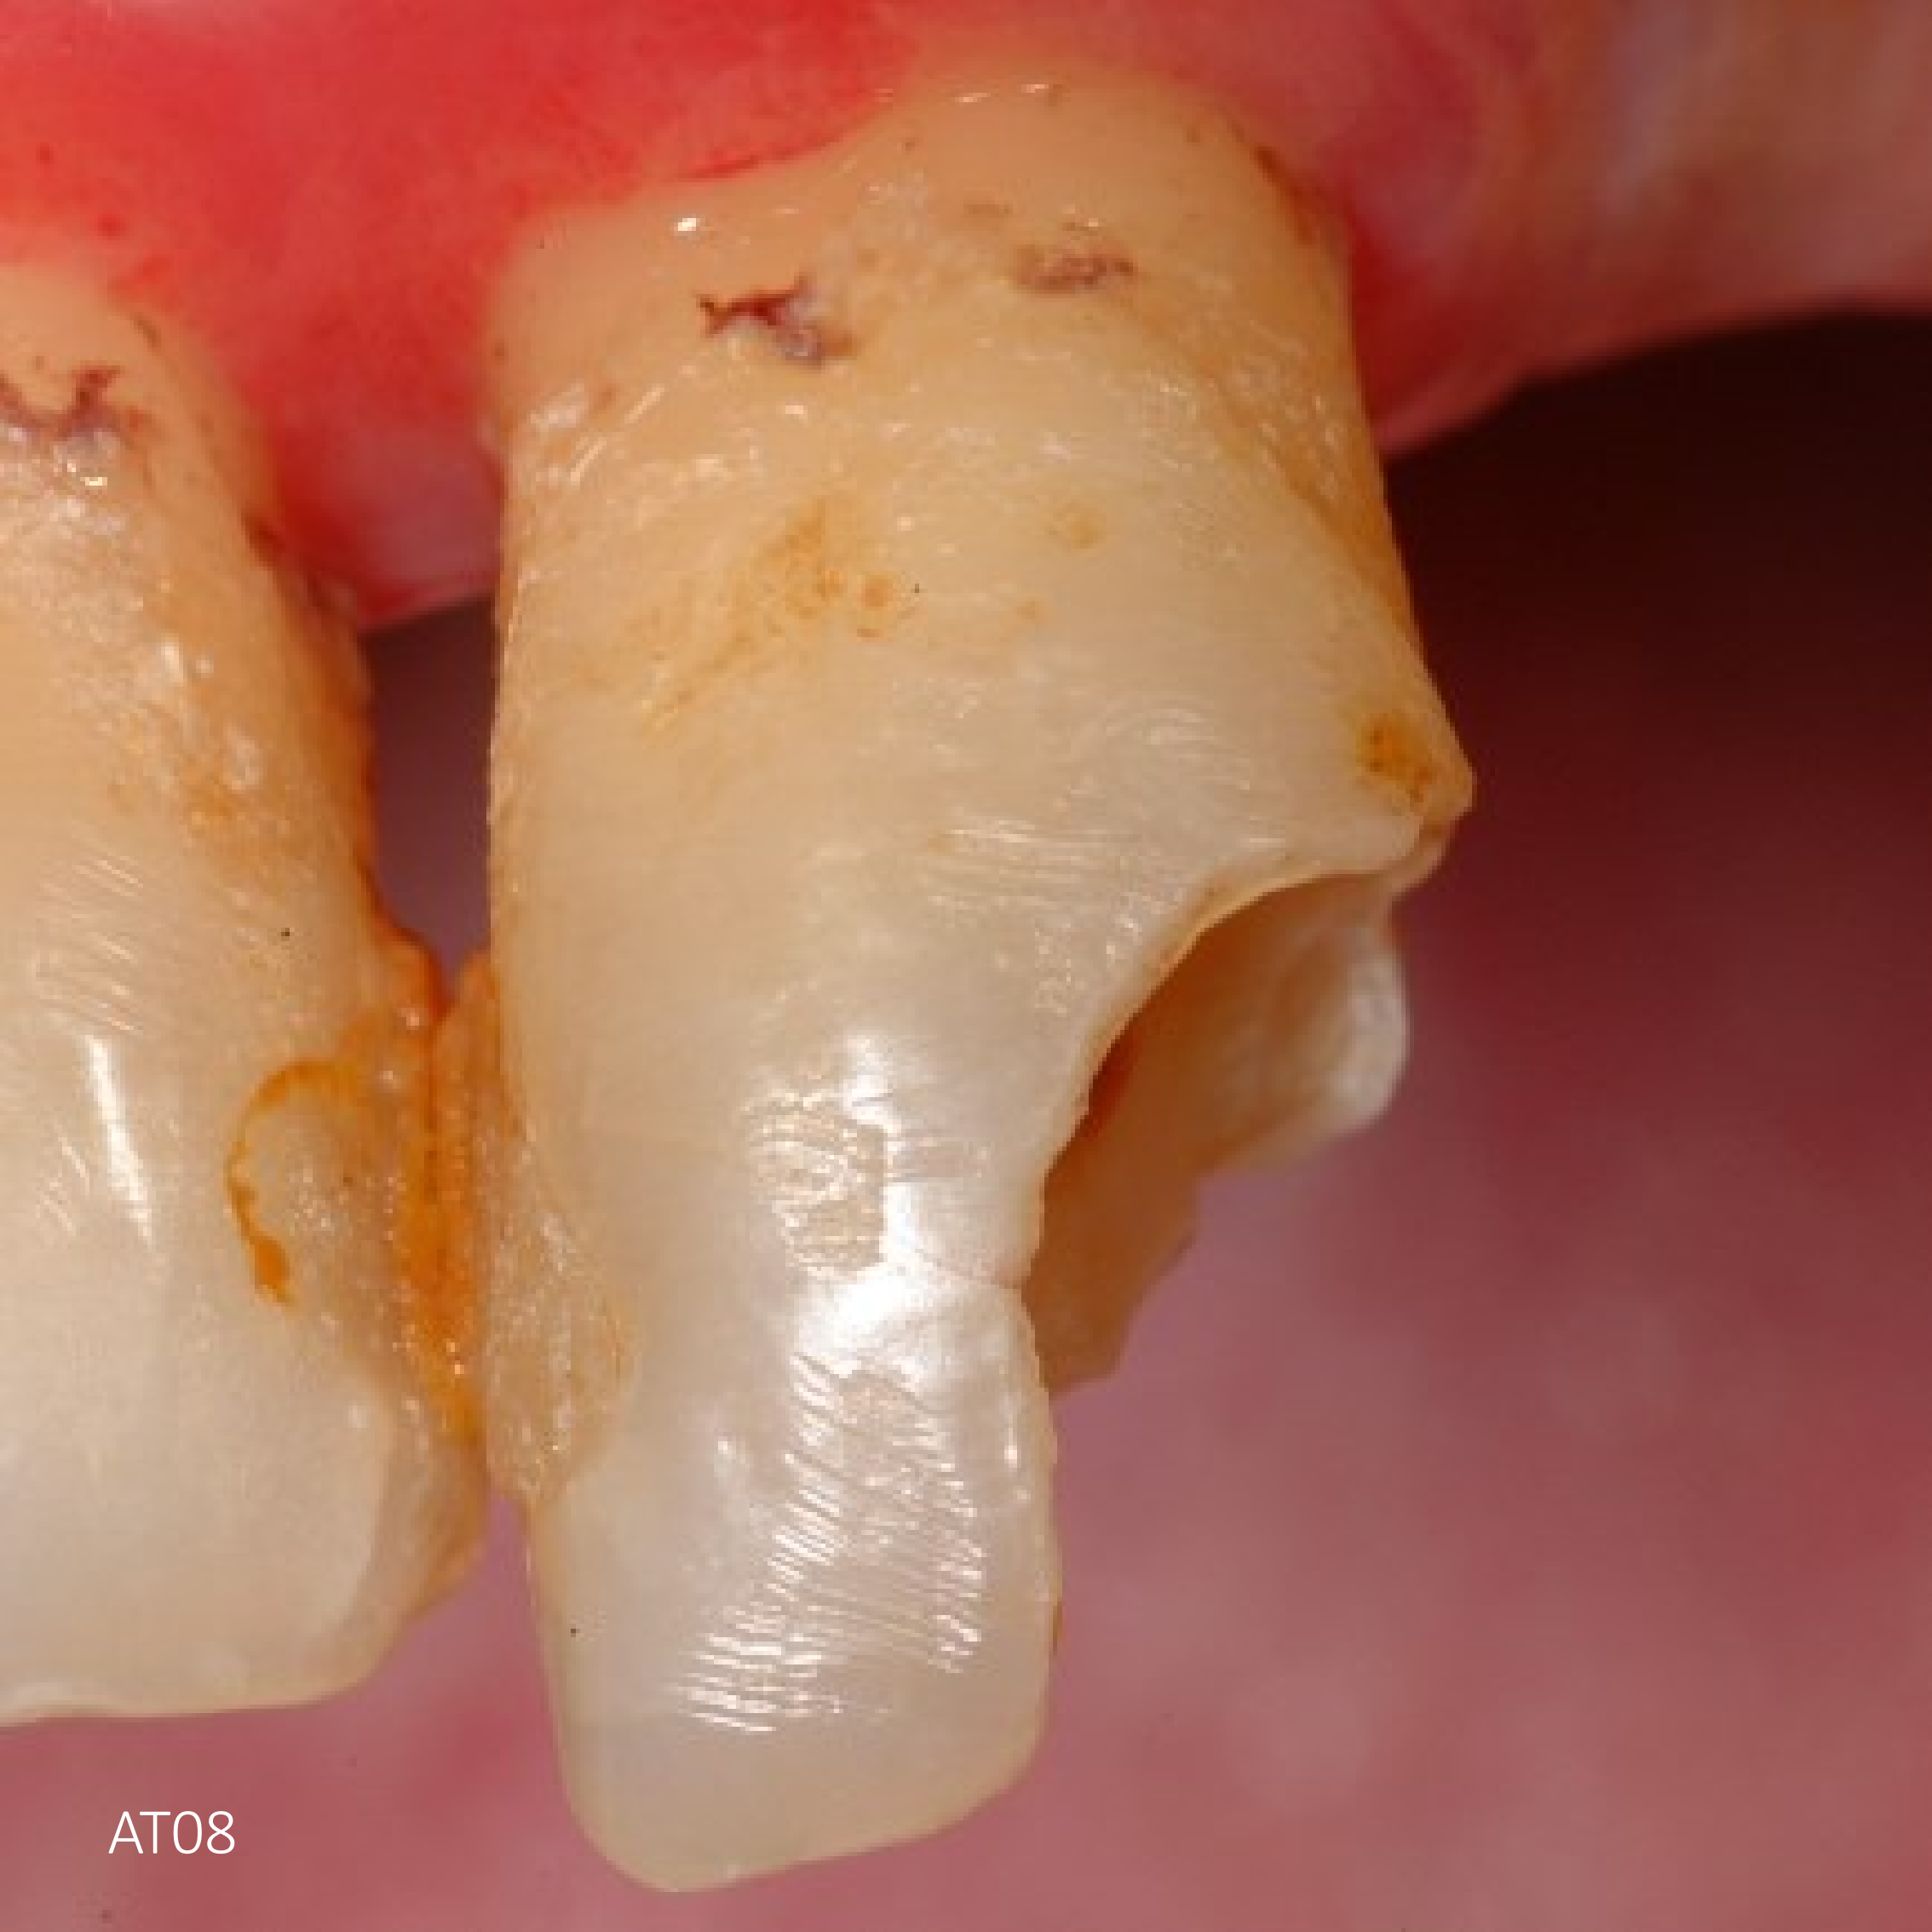

AT08

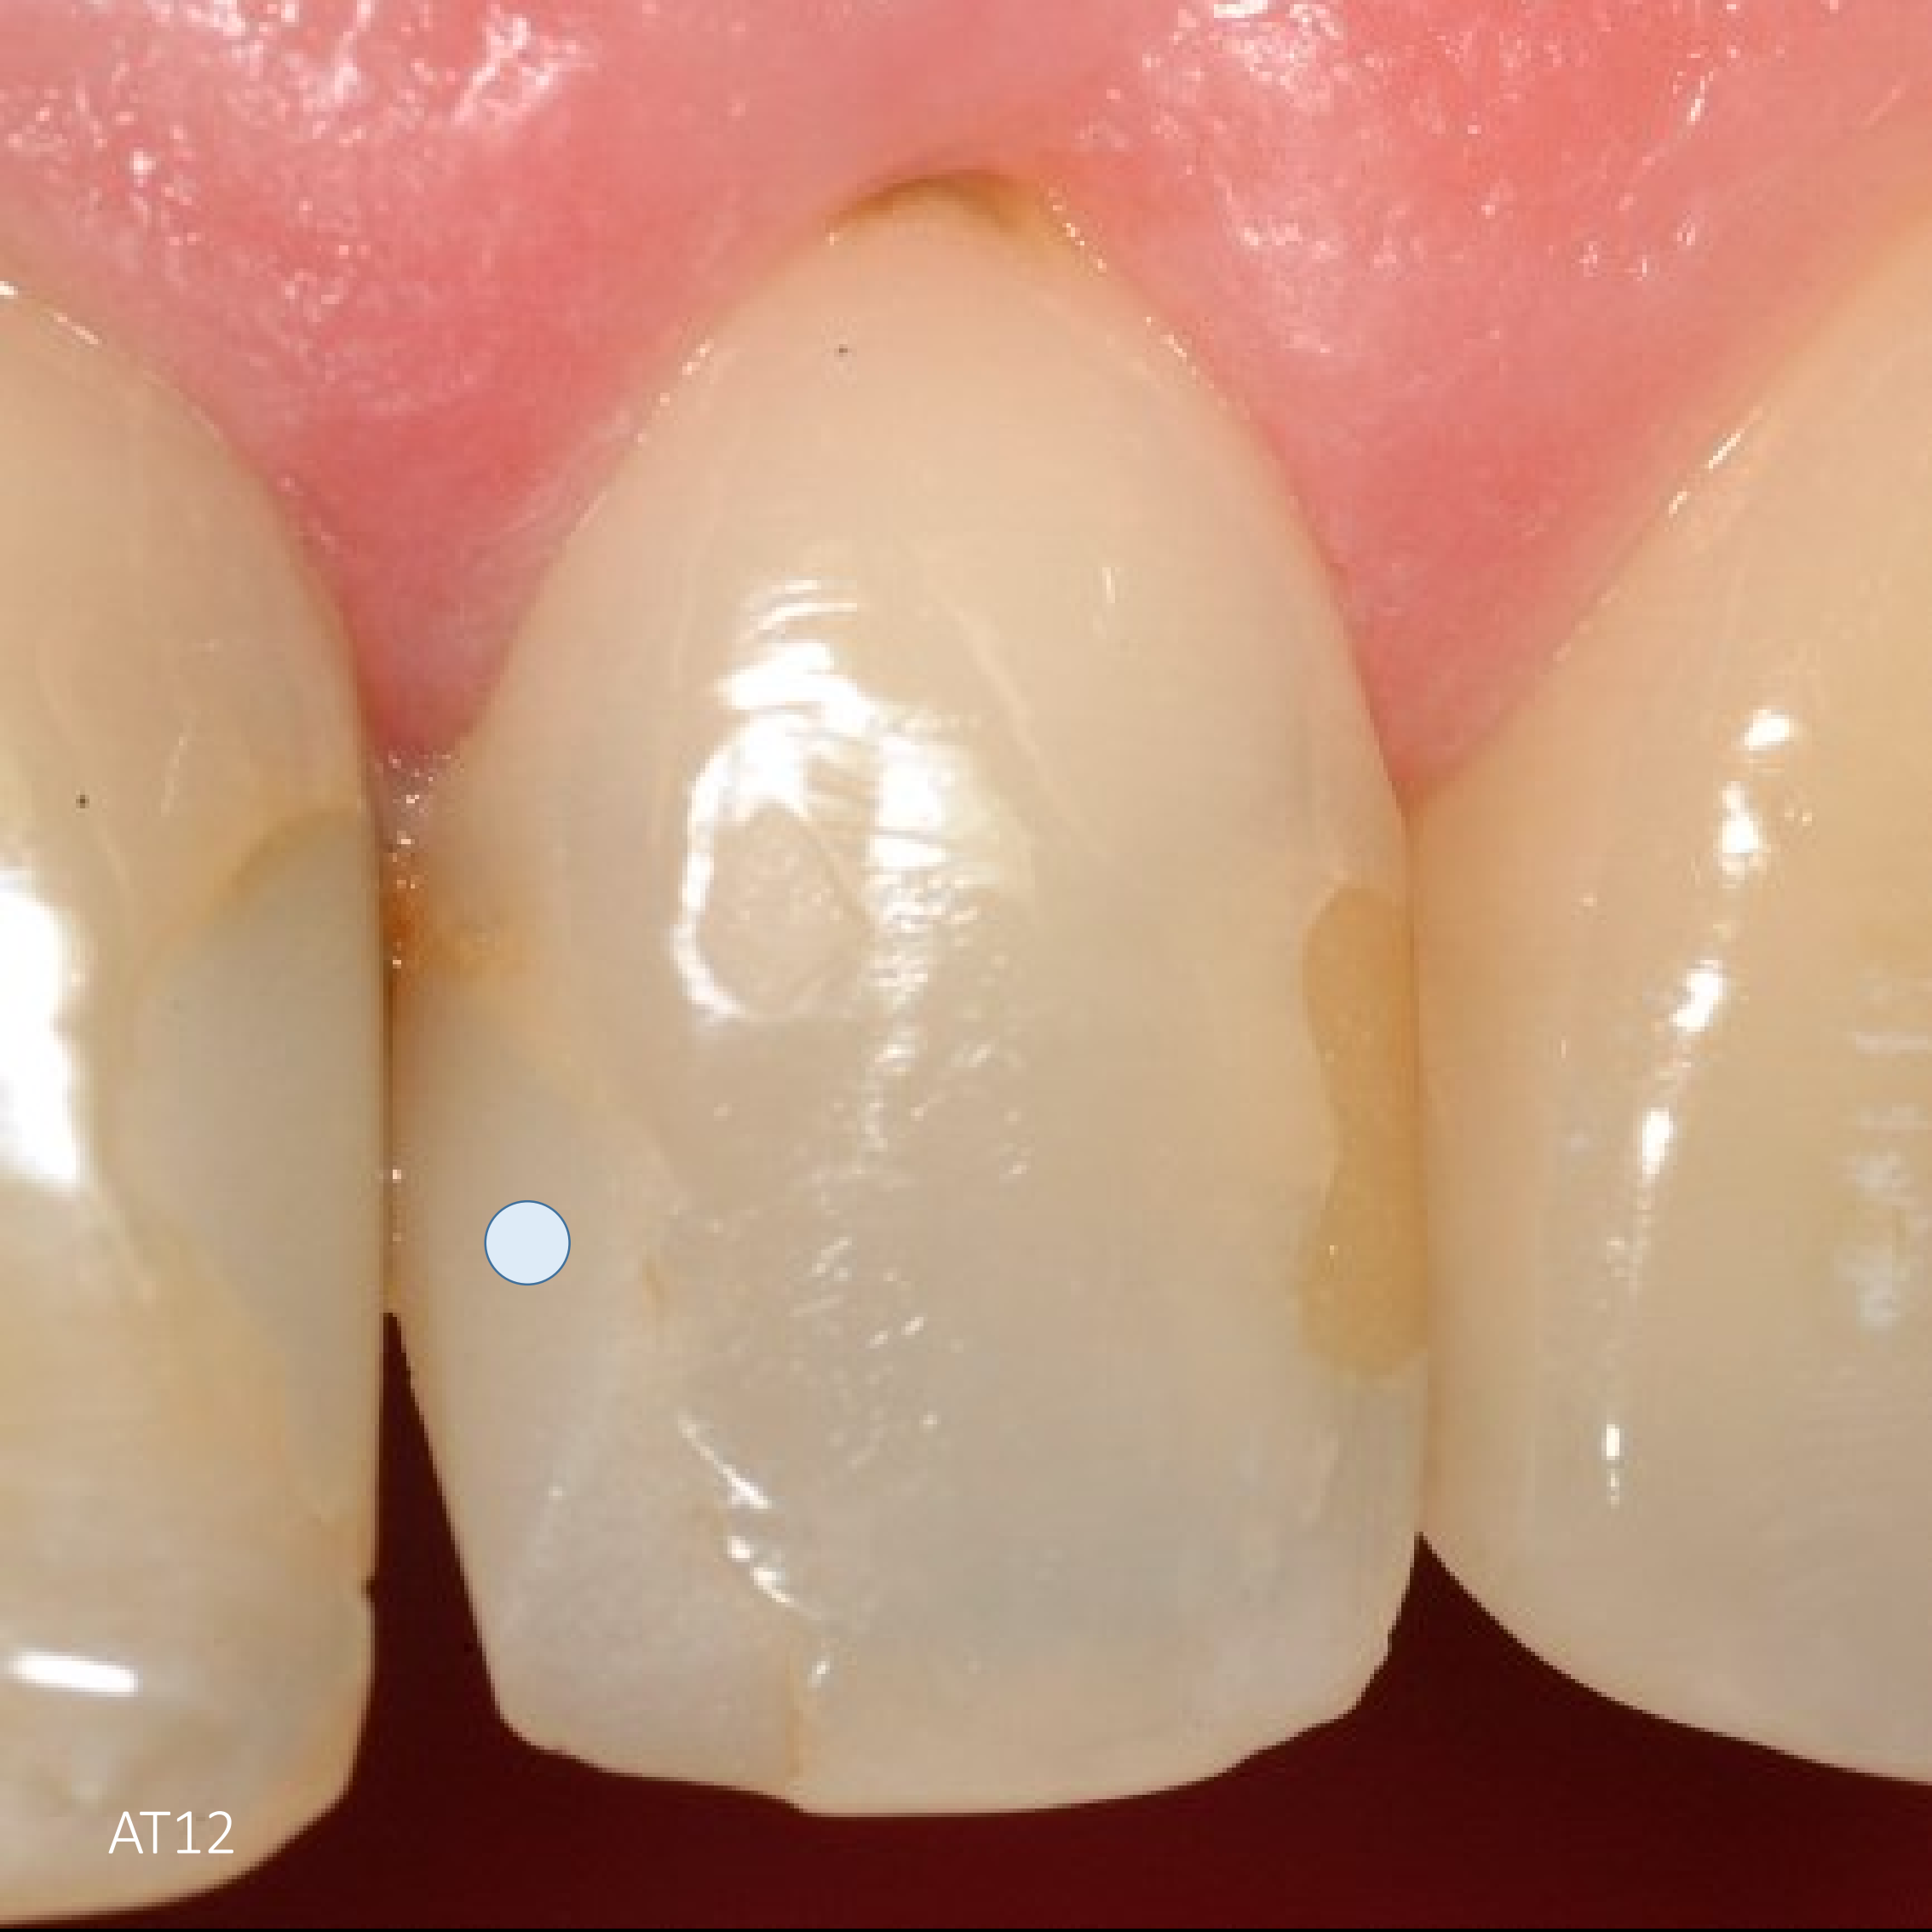

AT12

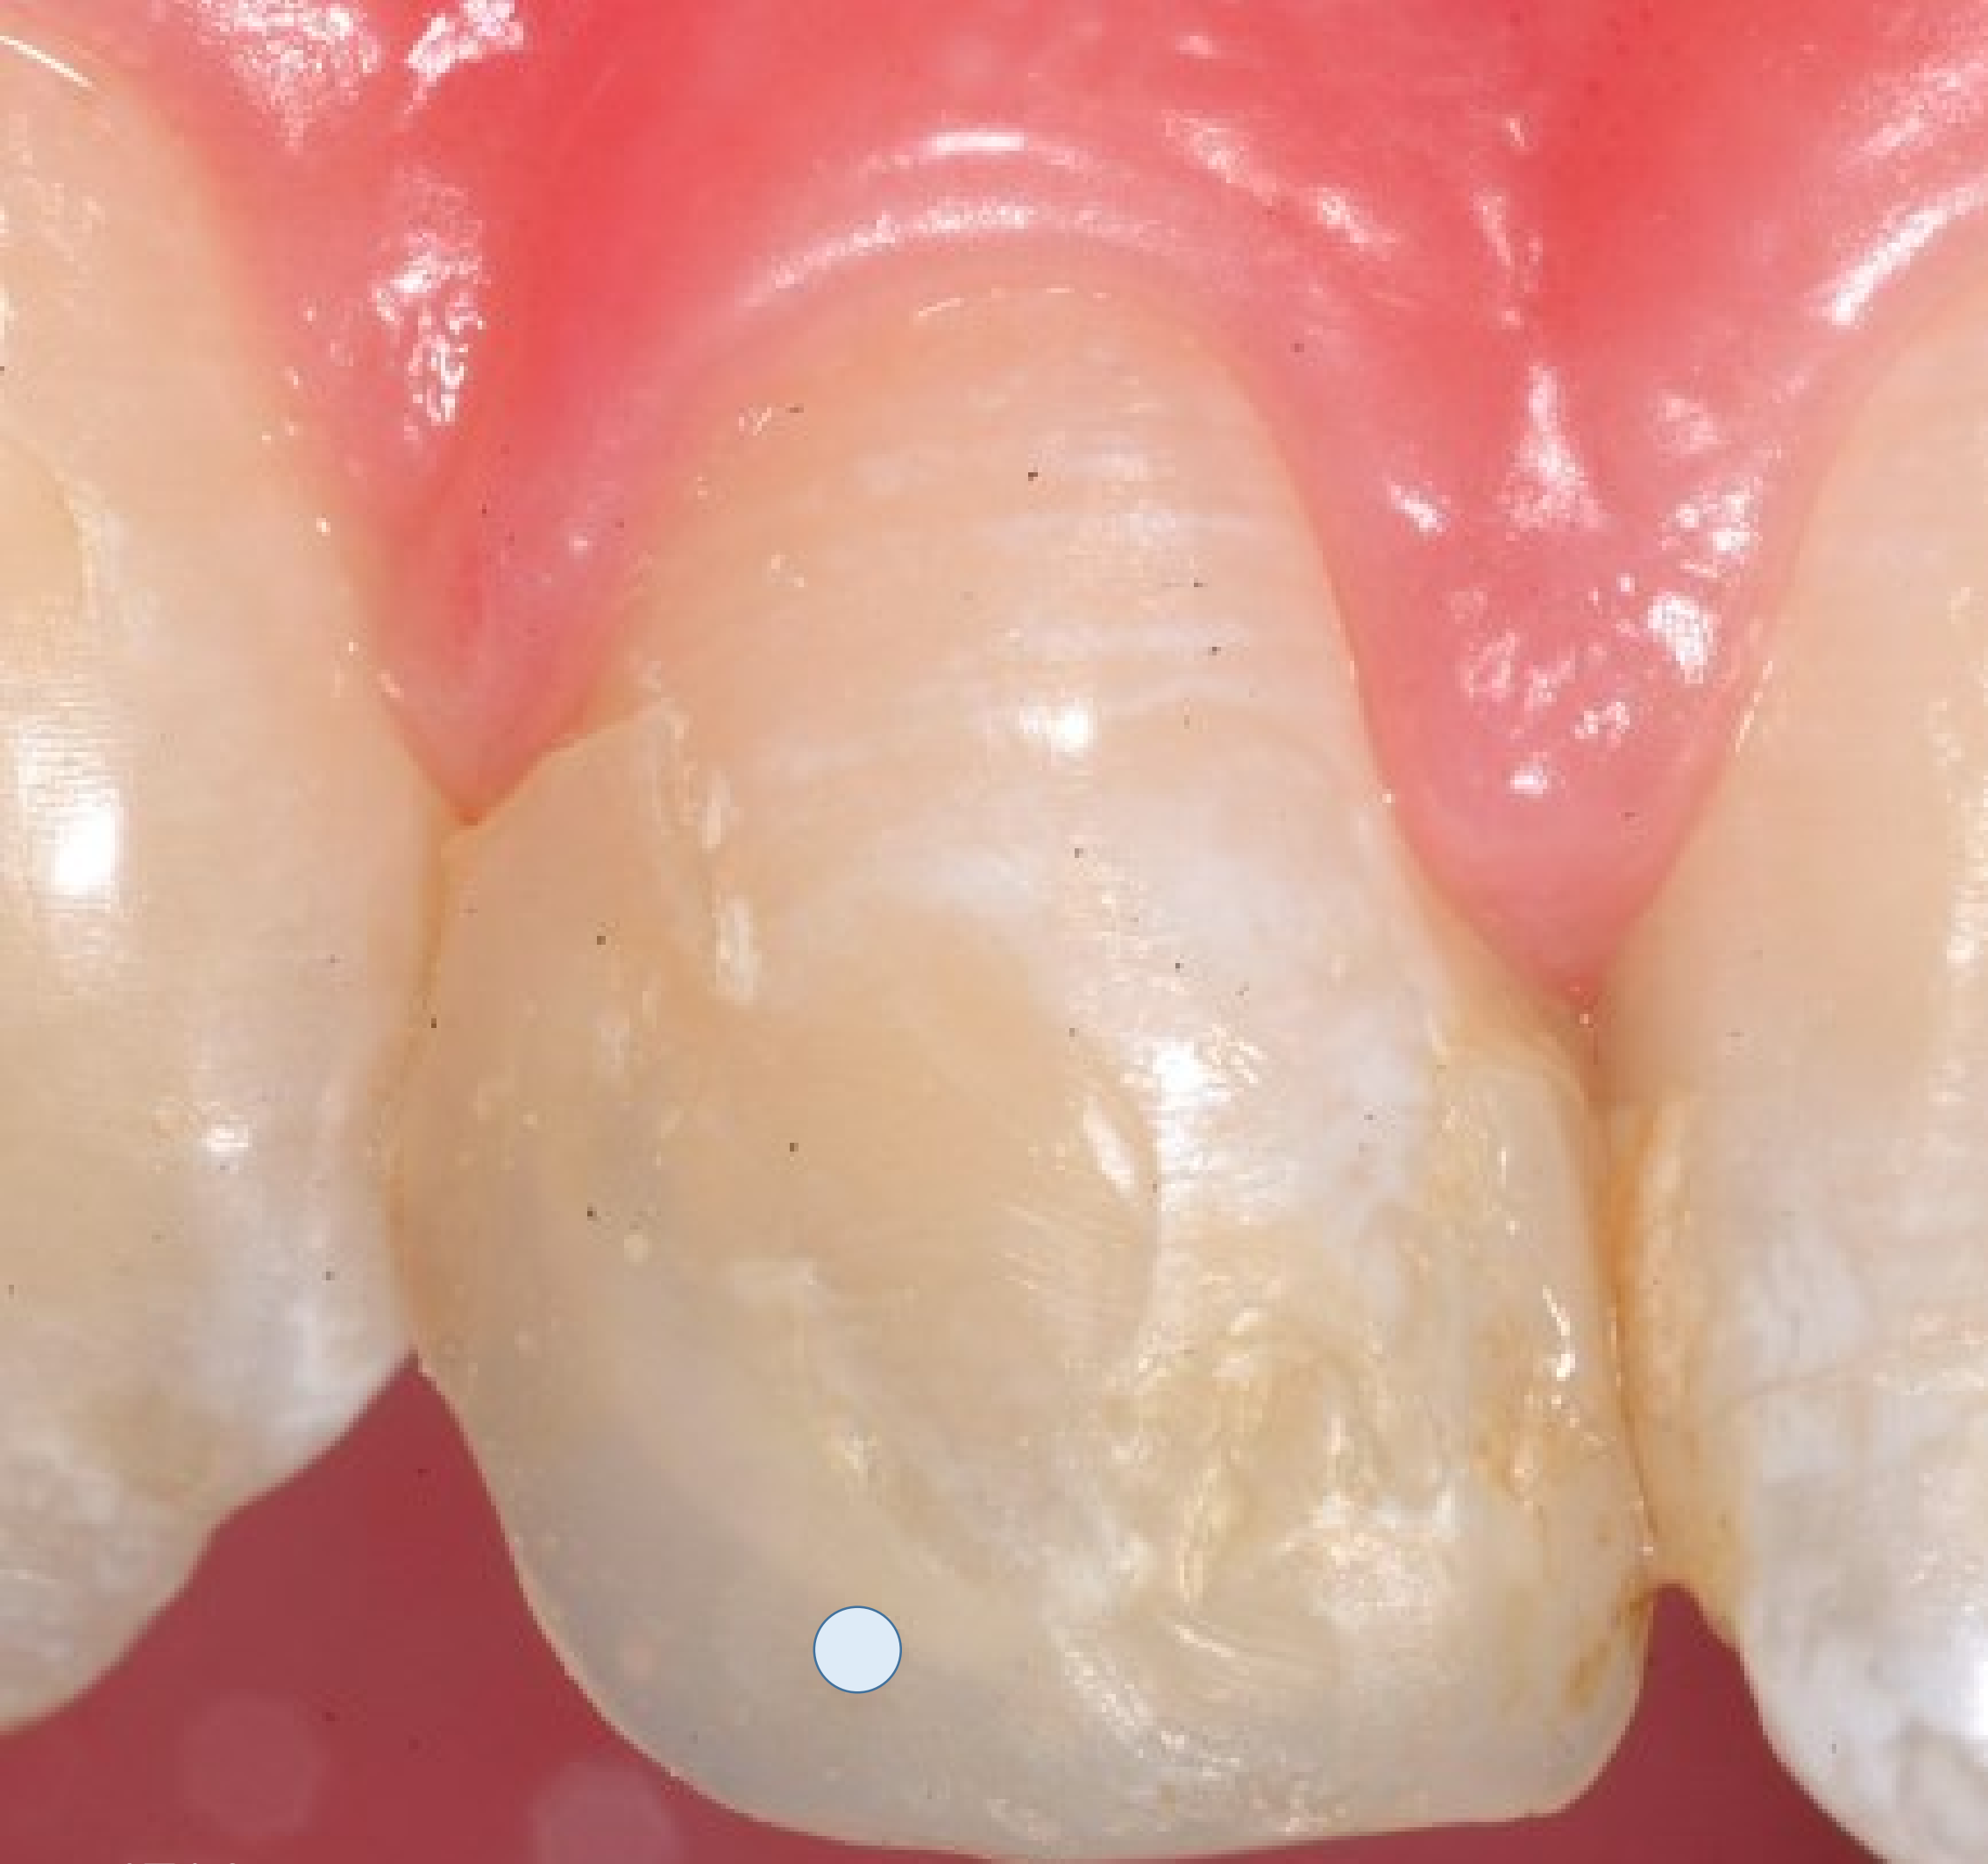

AT14

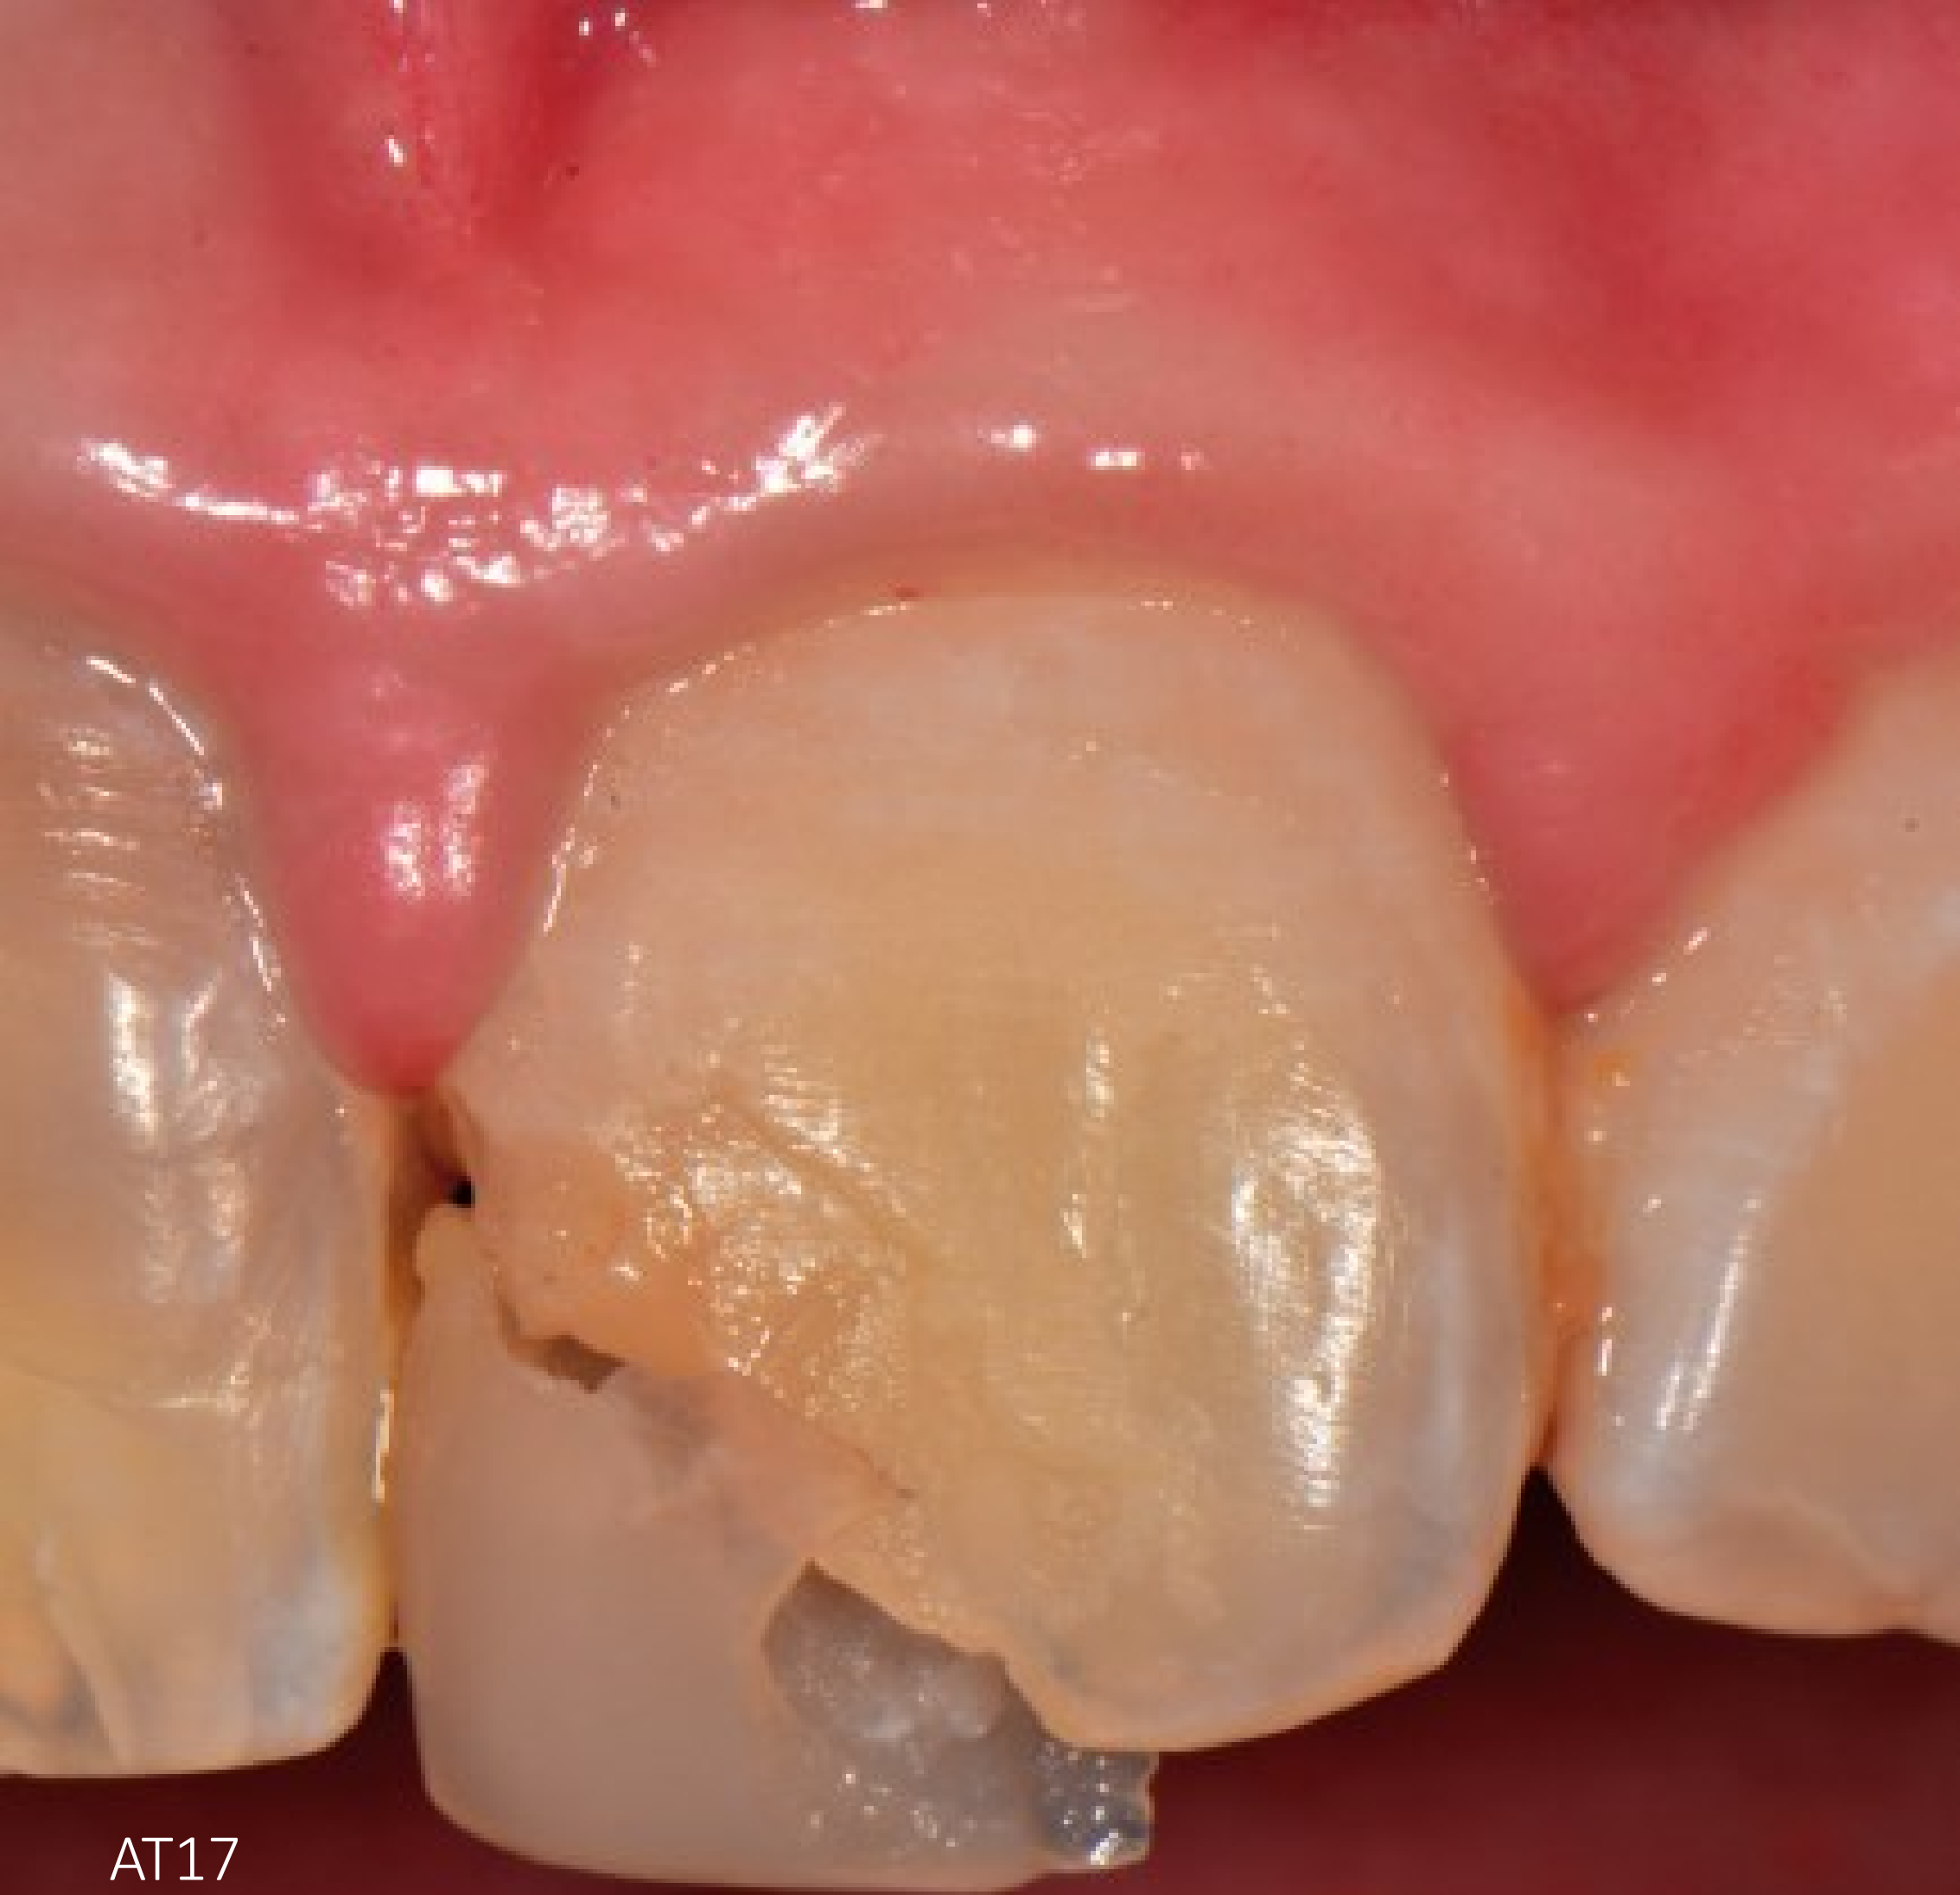

AT17

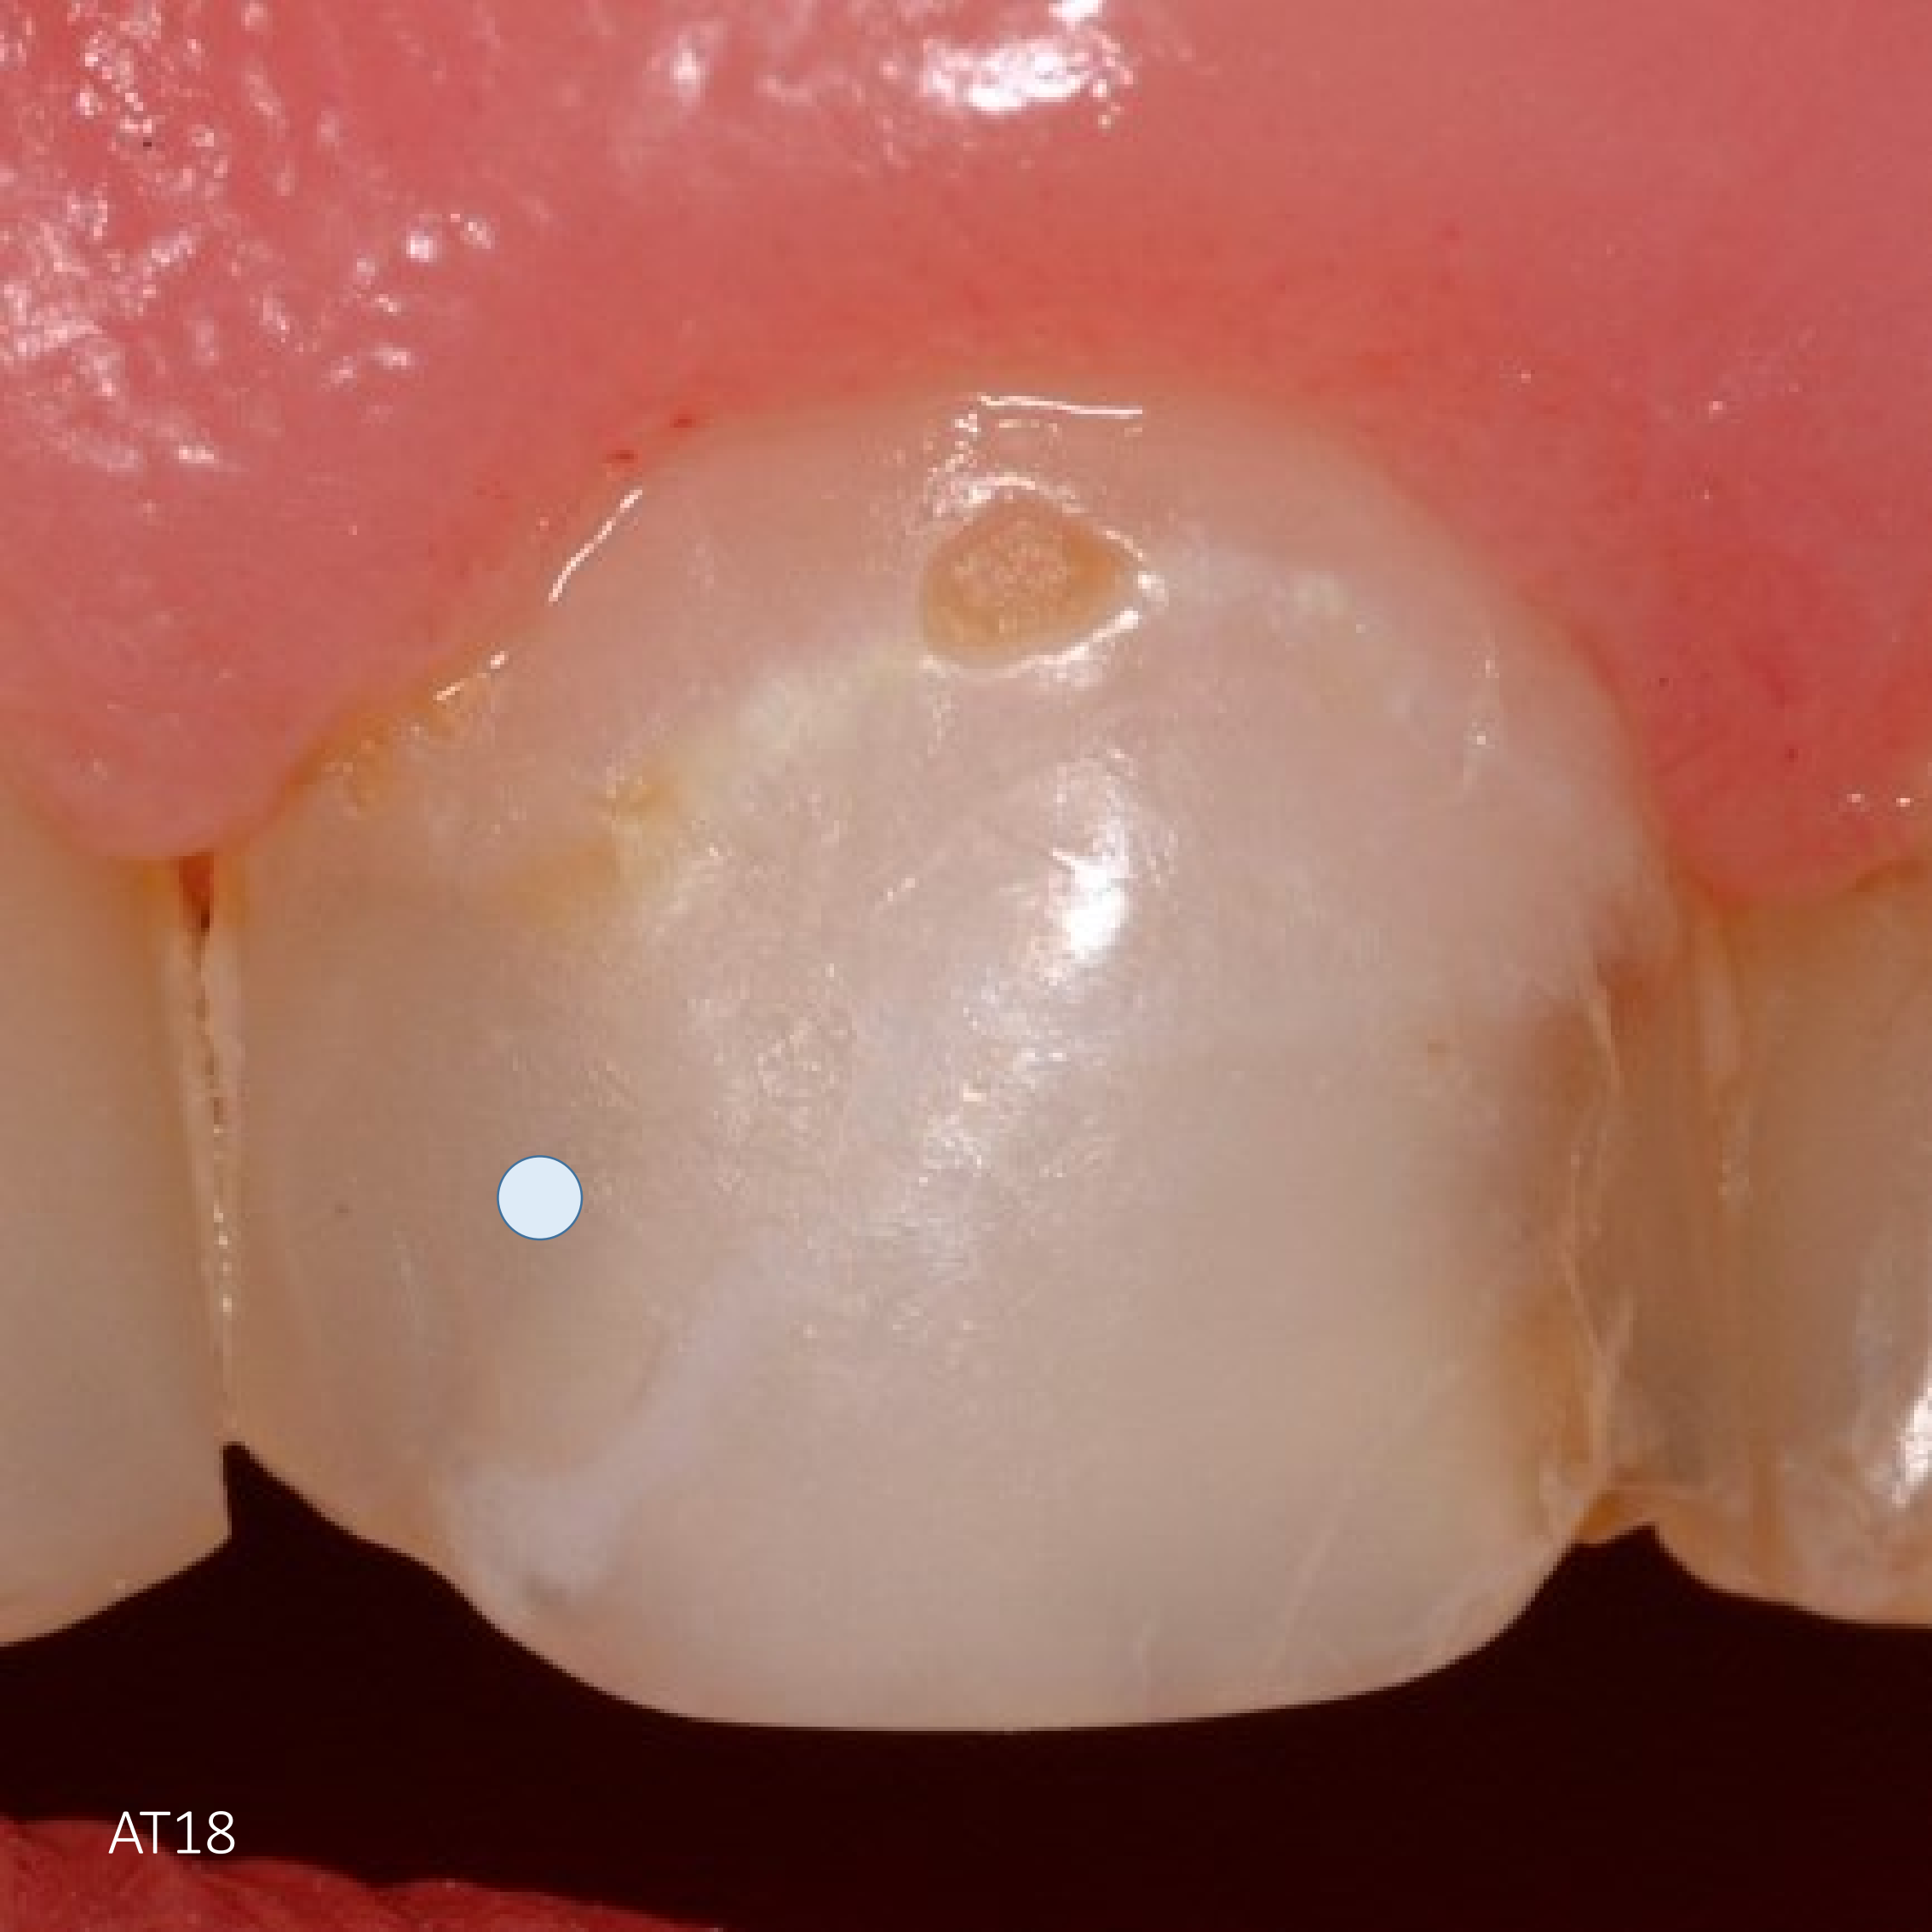

AT18



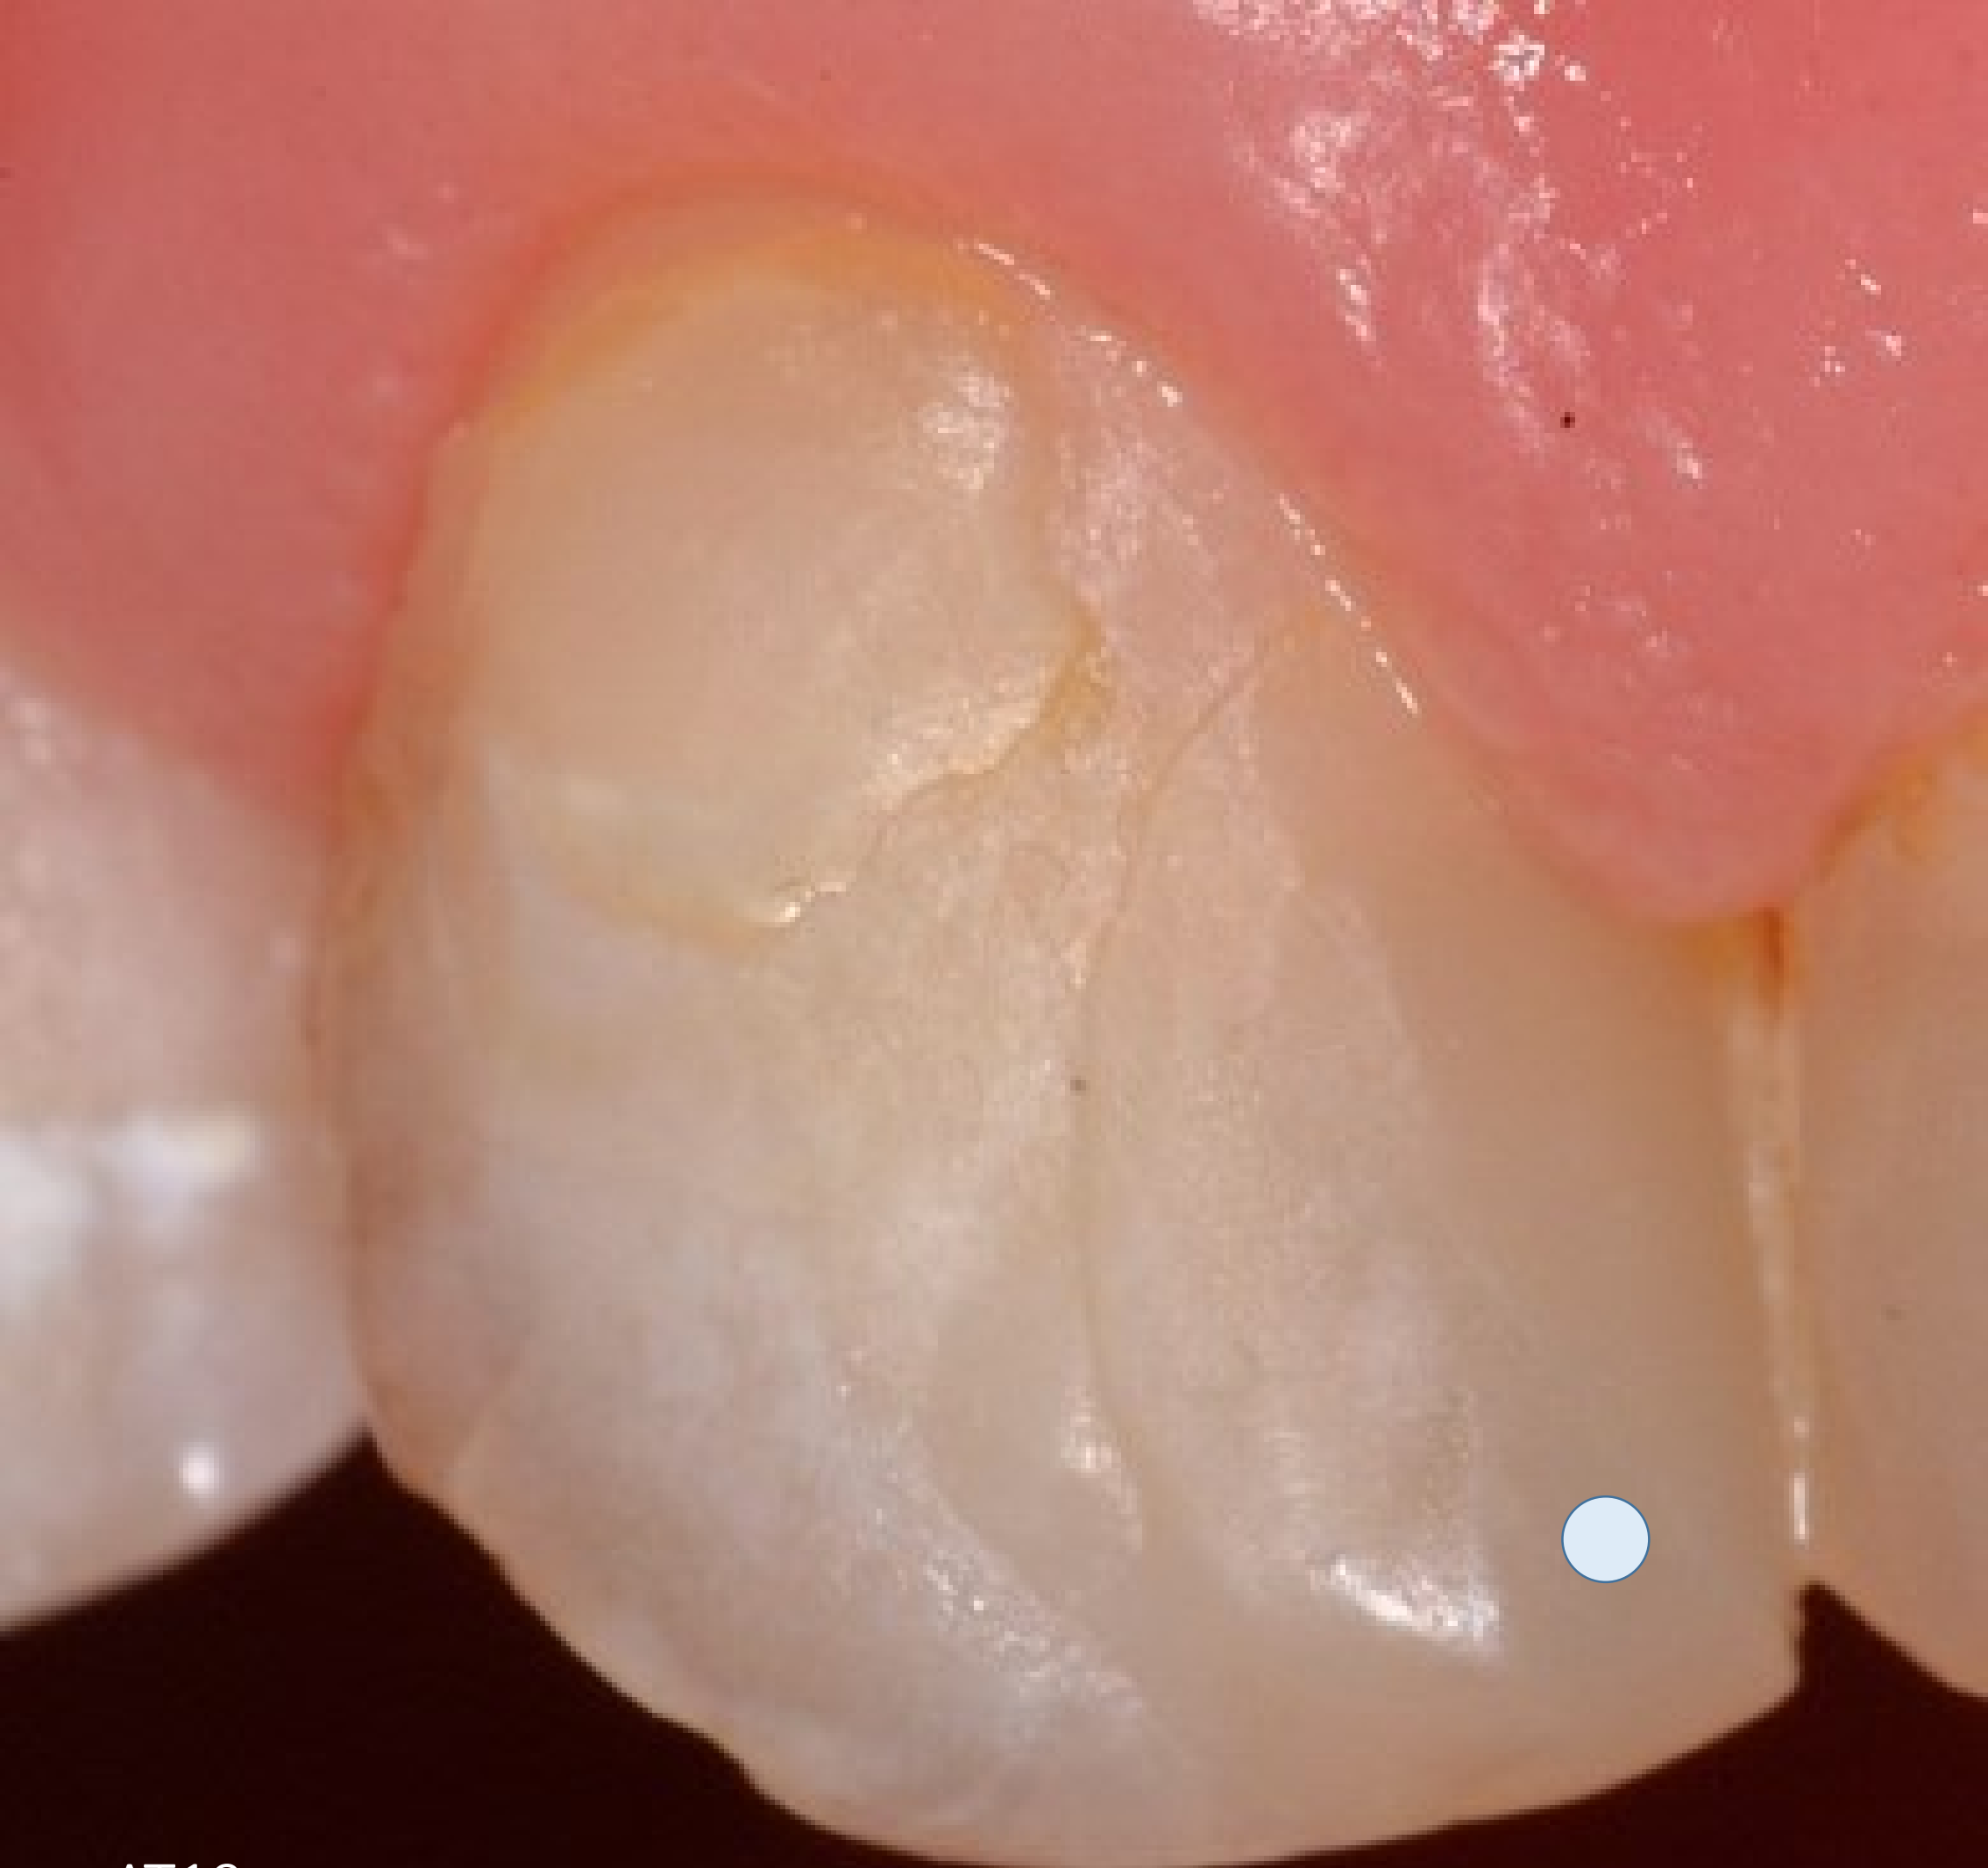

AT19

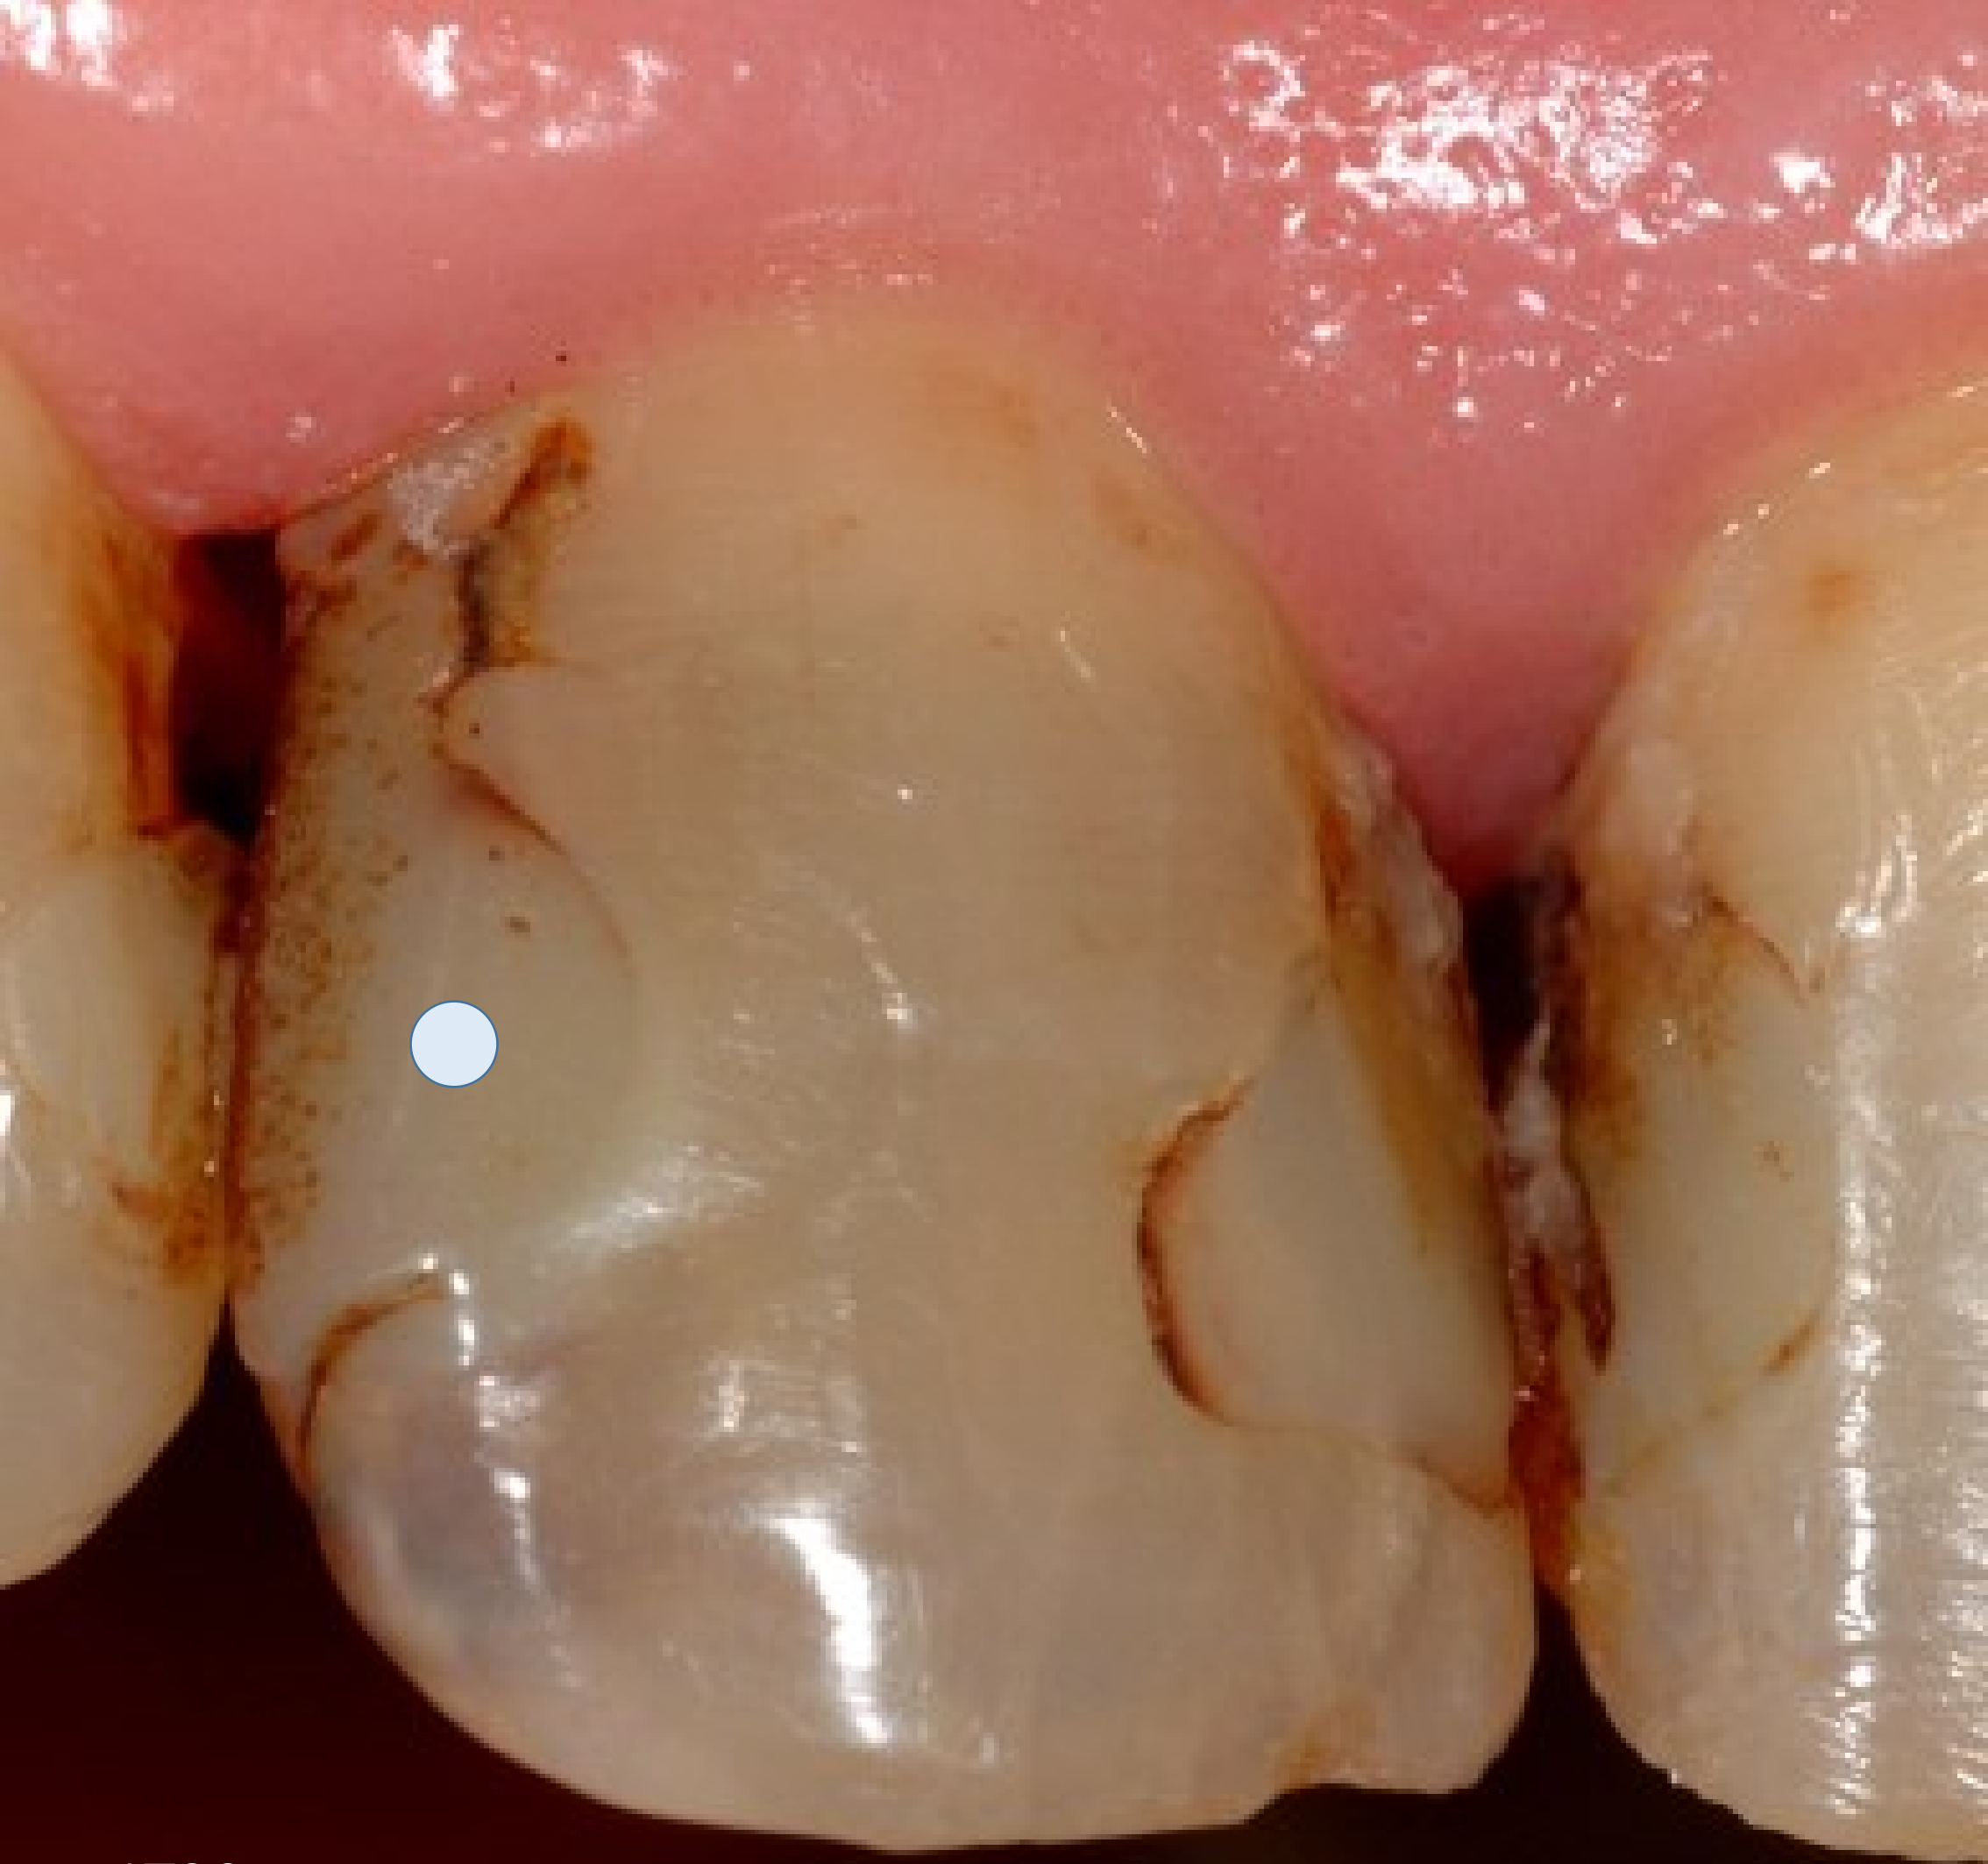

AT20

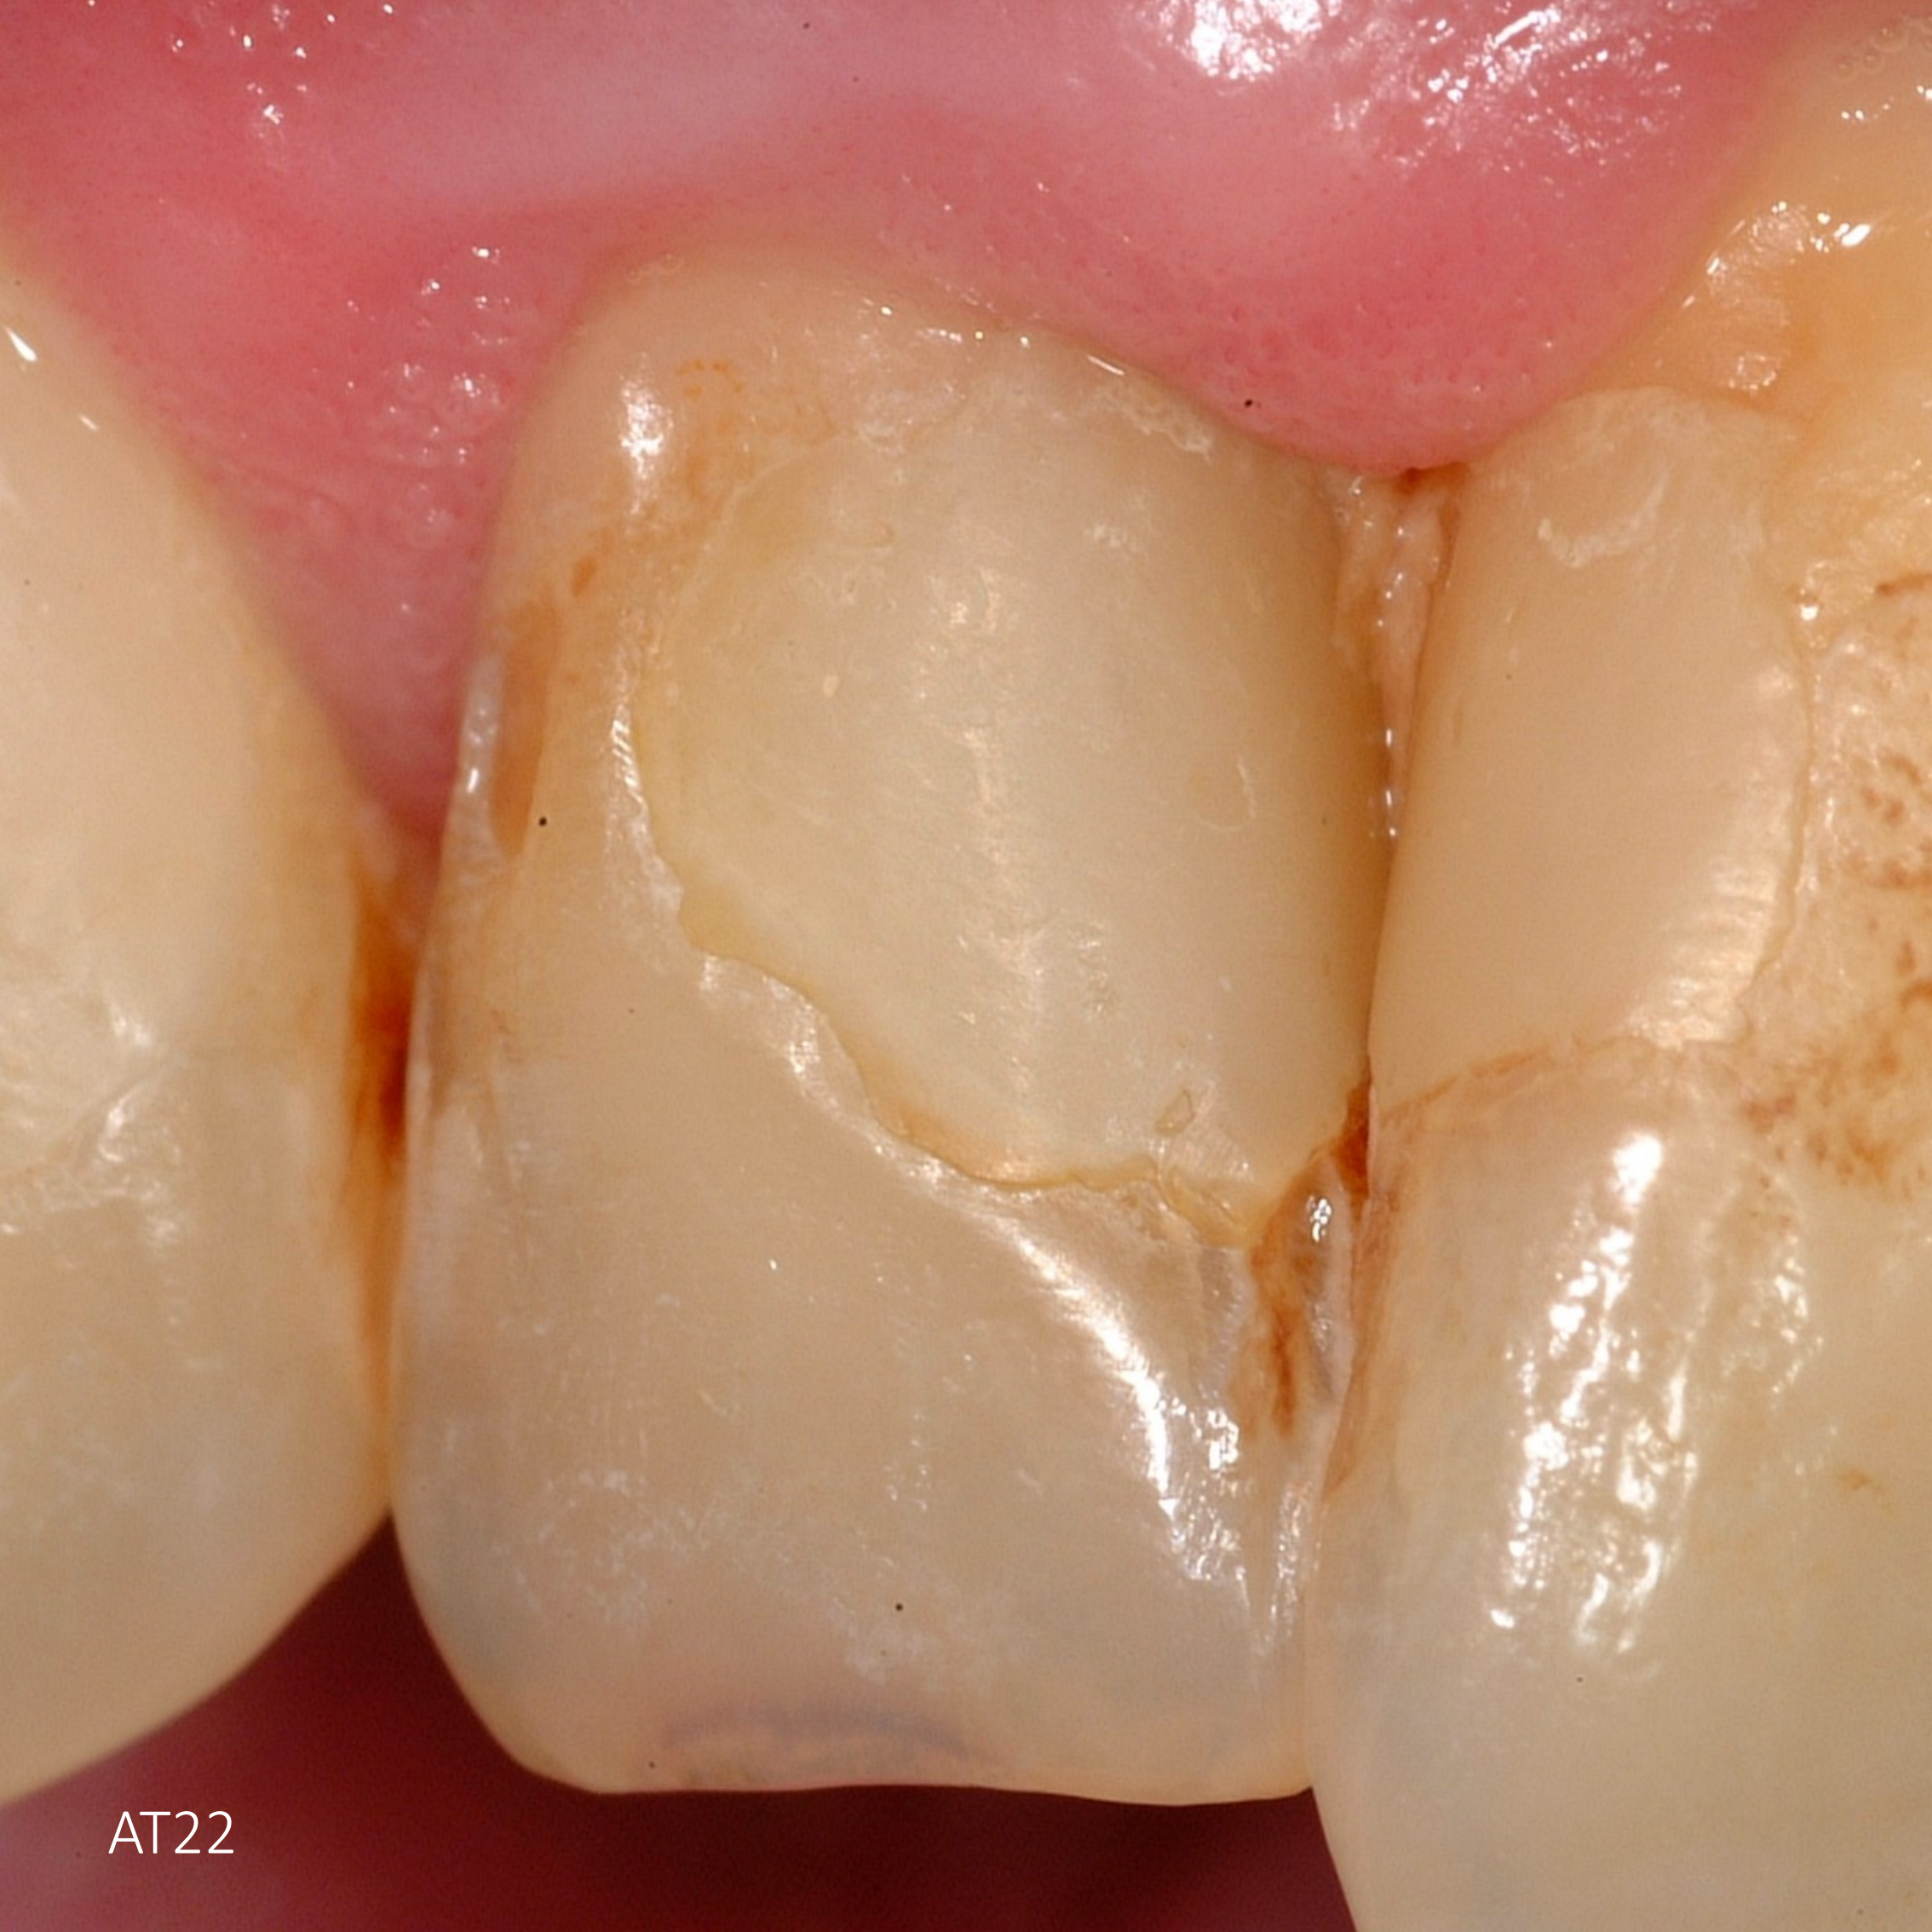

AT22



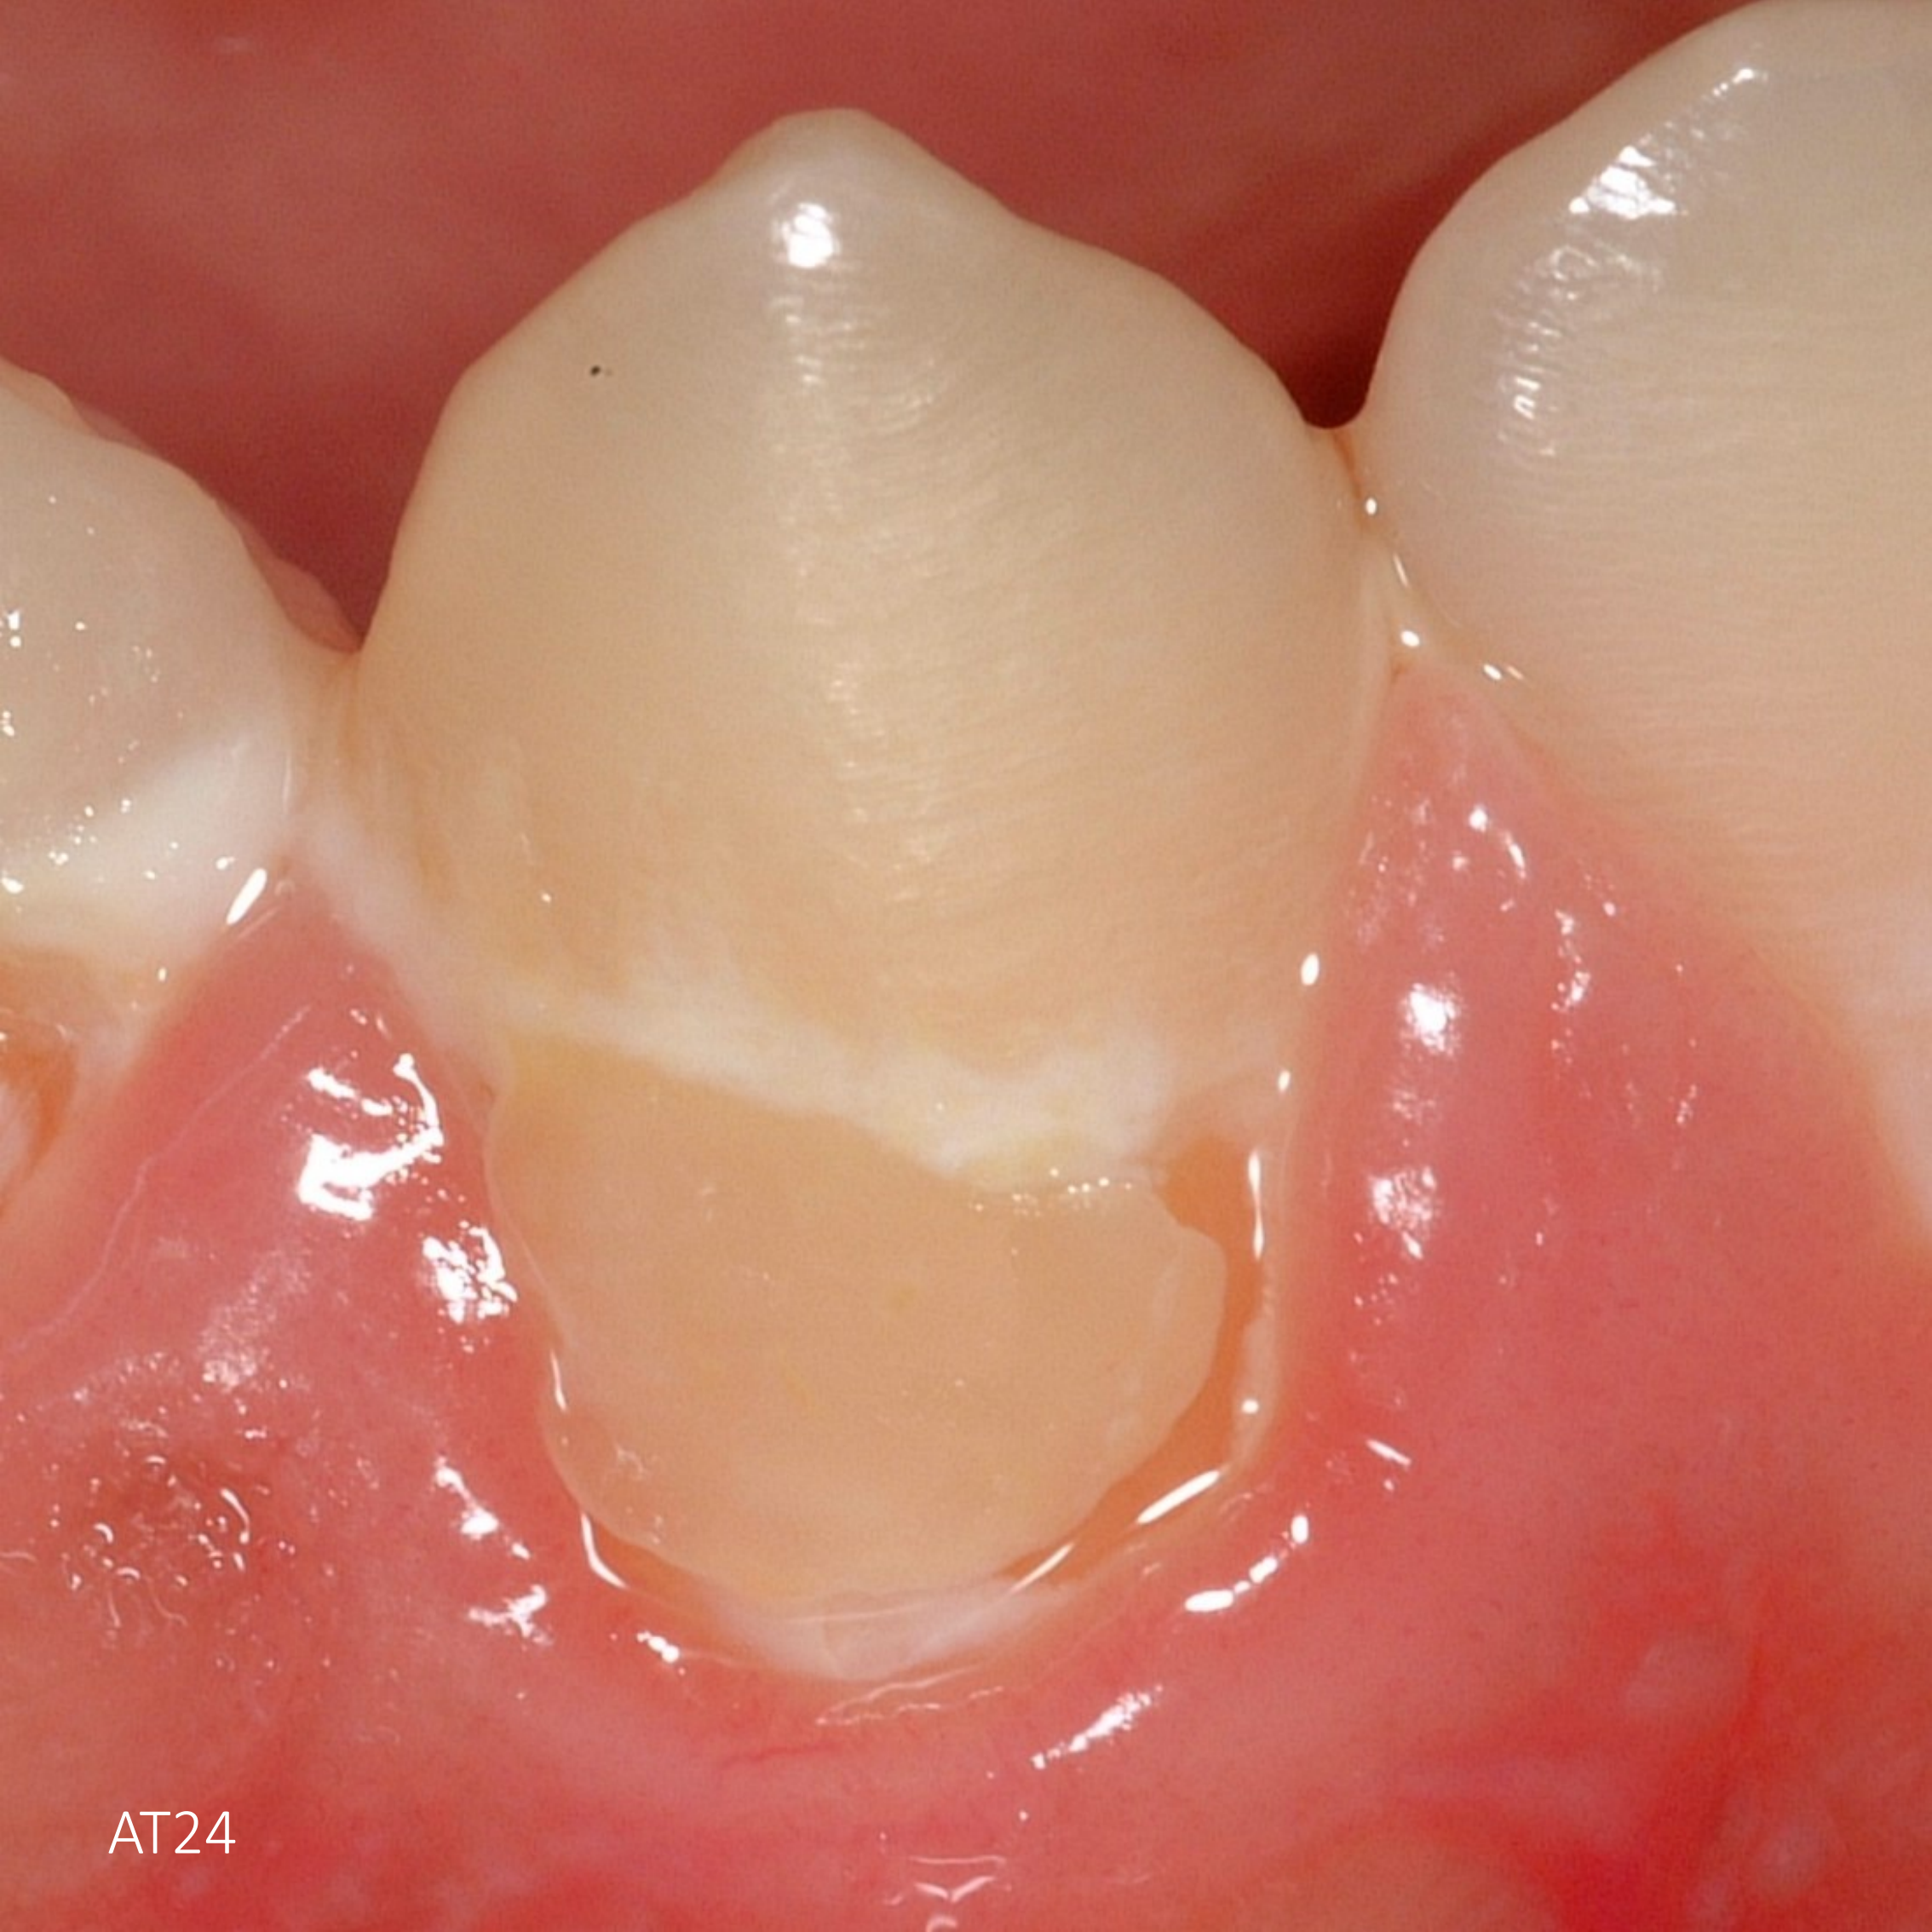

AT24

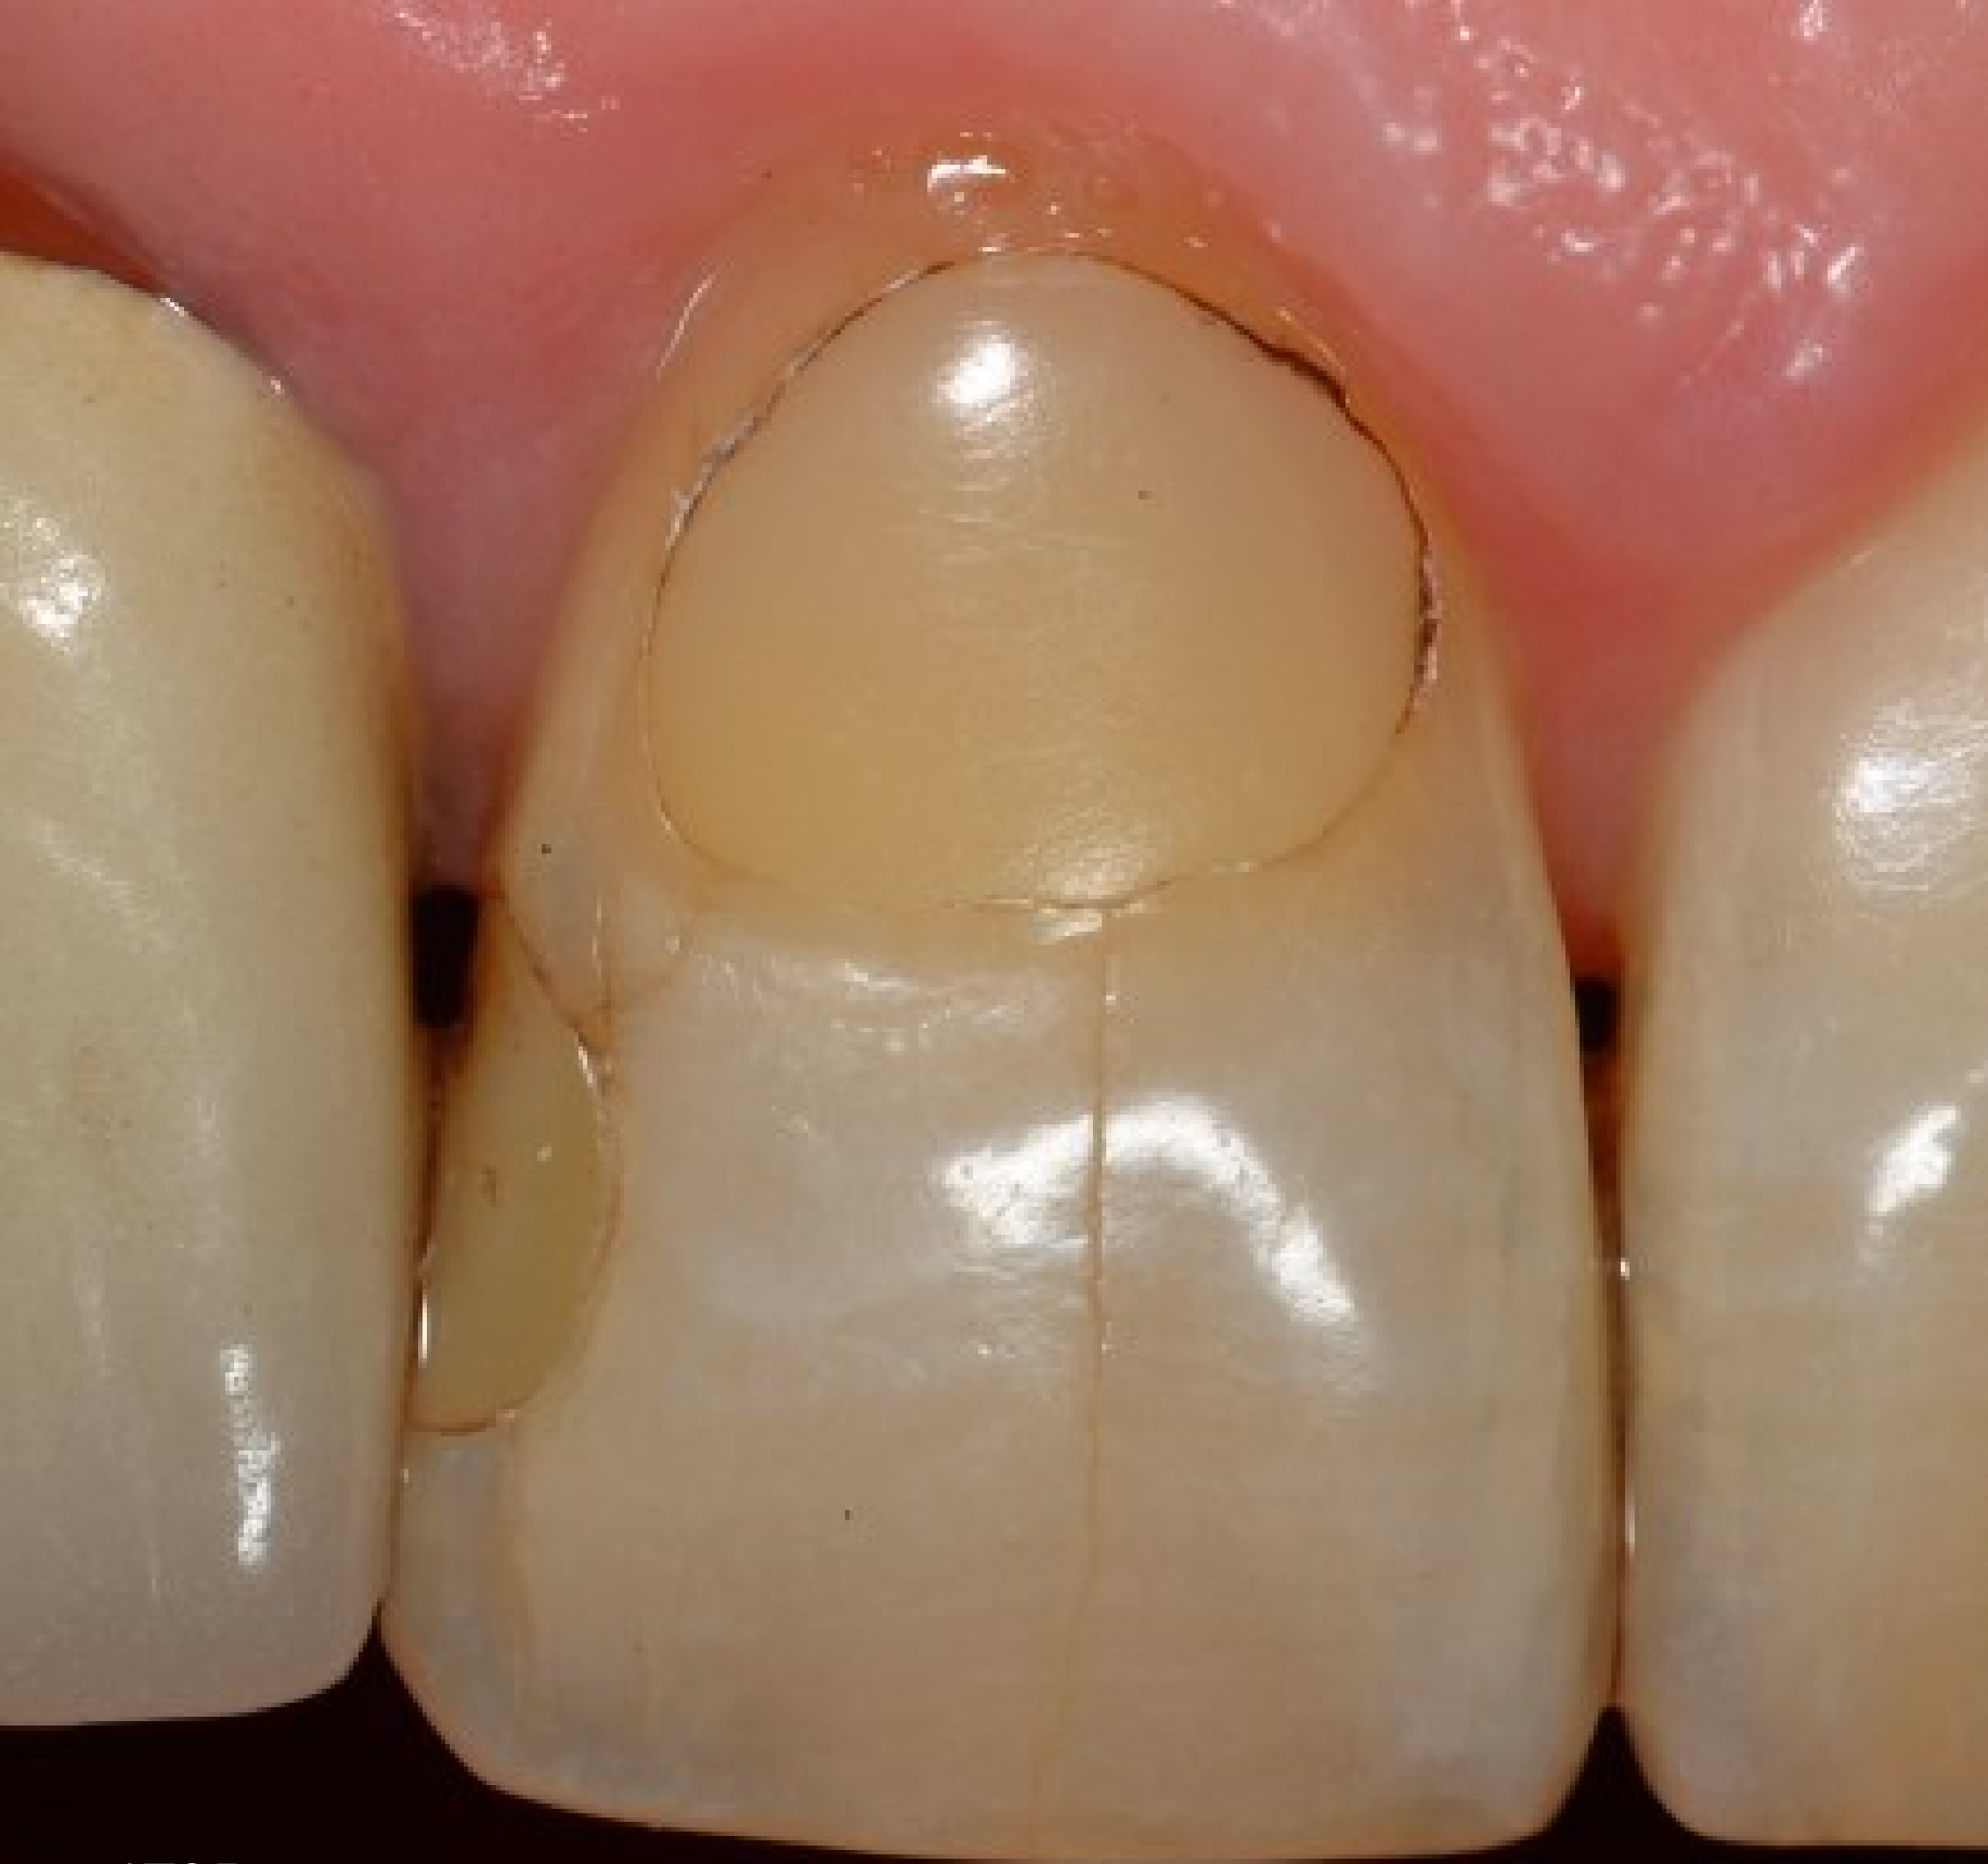

AT25



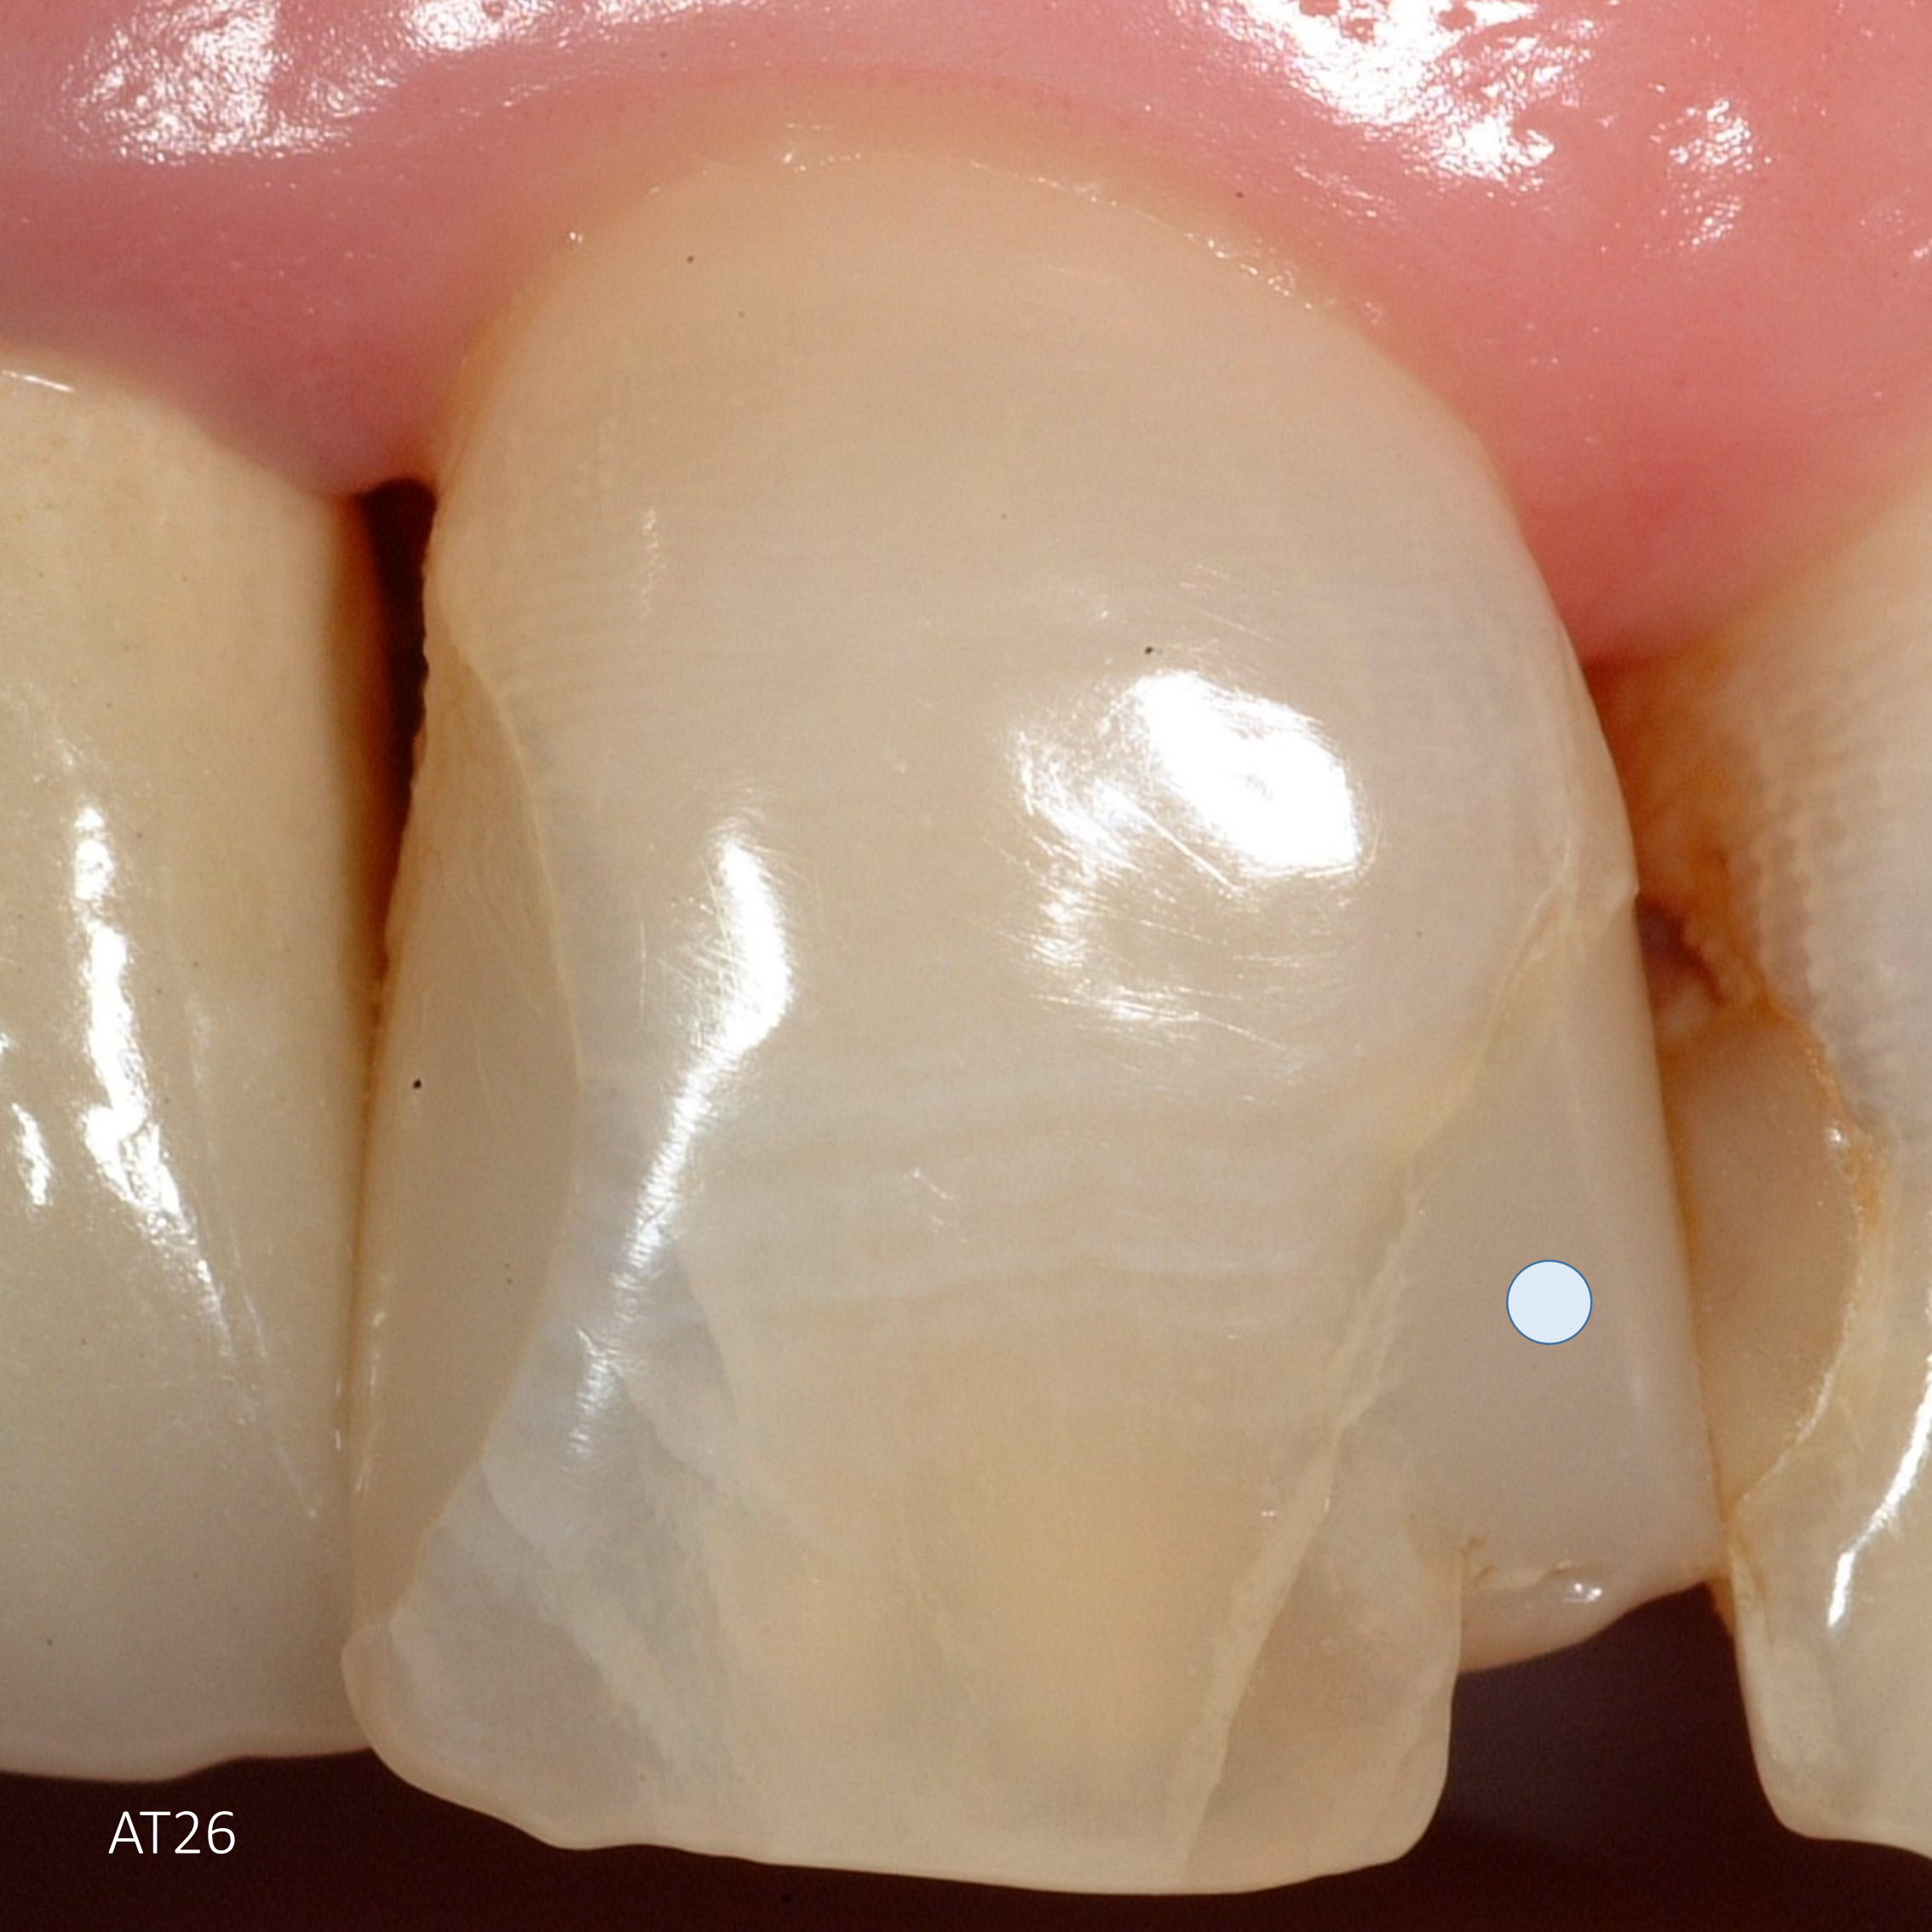

AT26

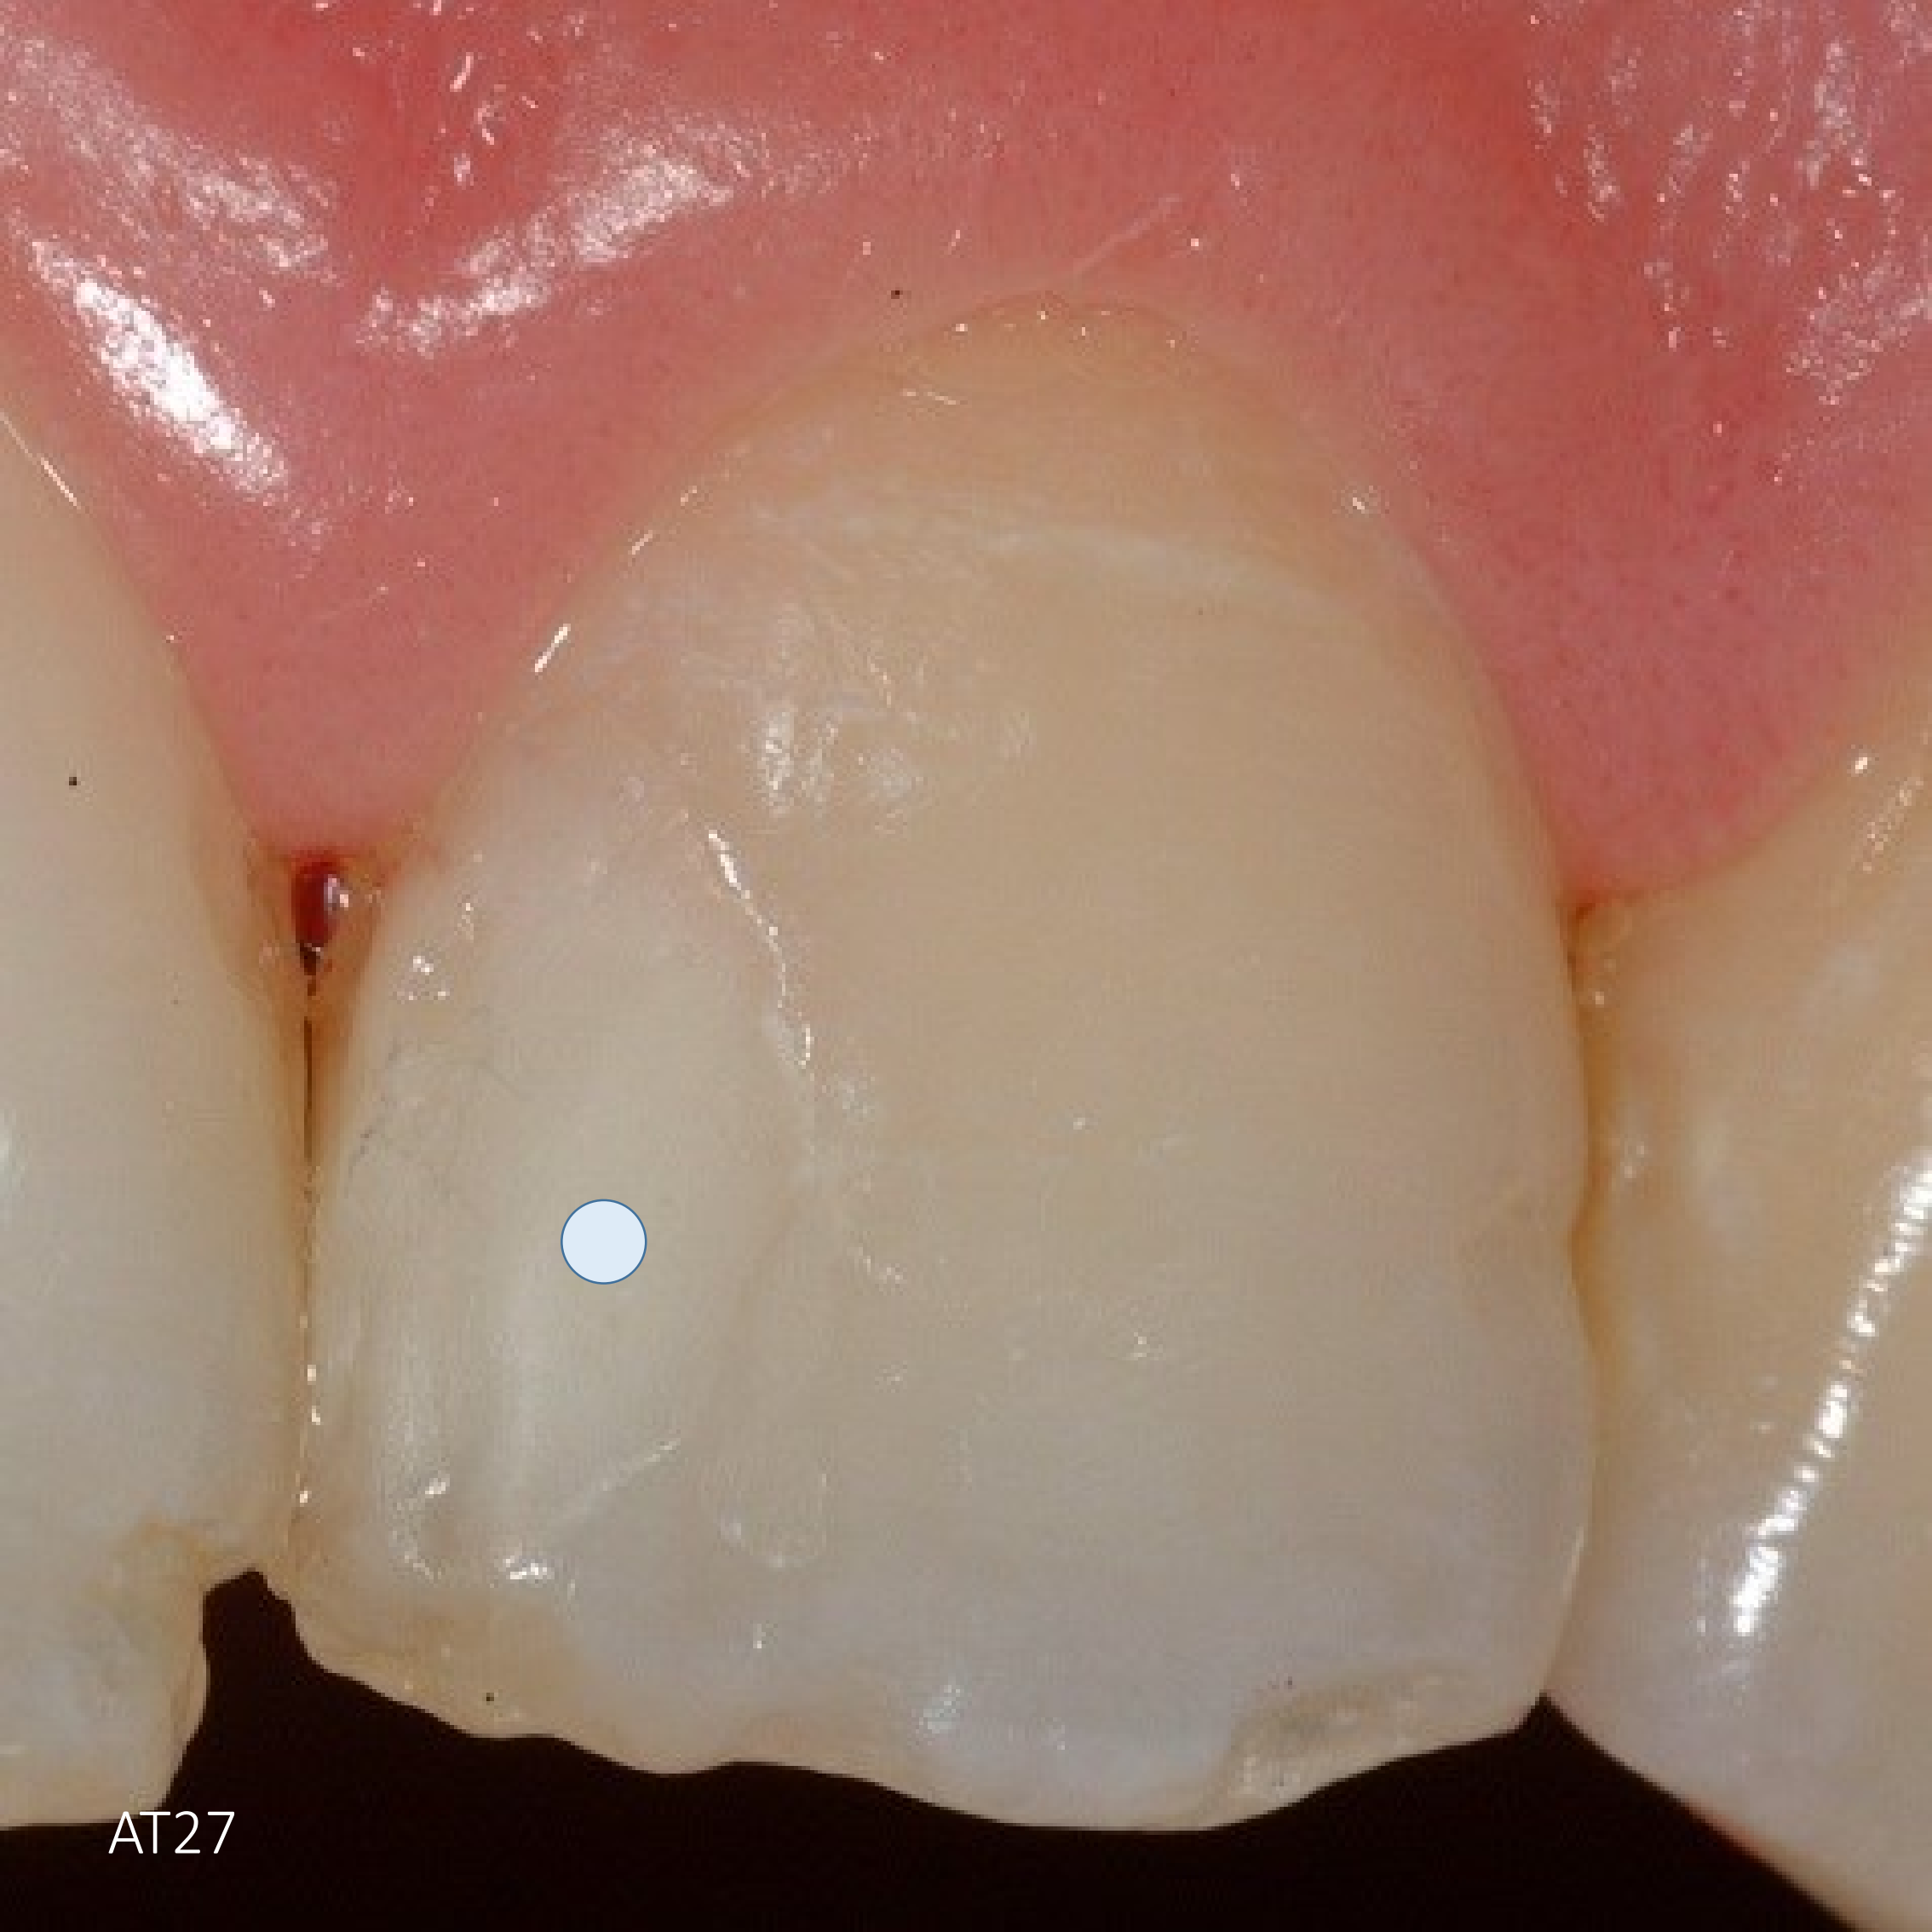

AT27

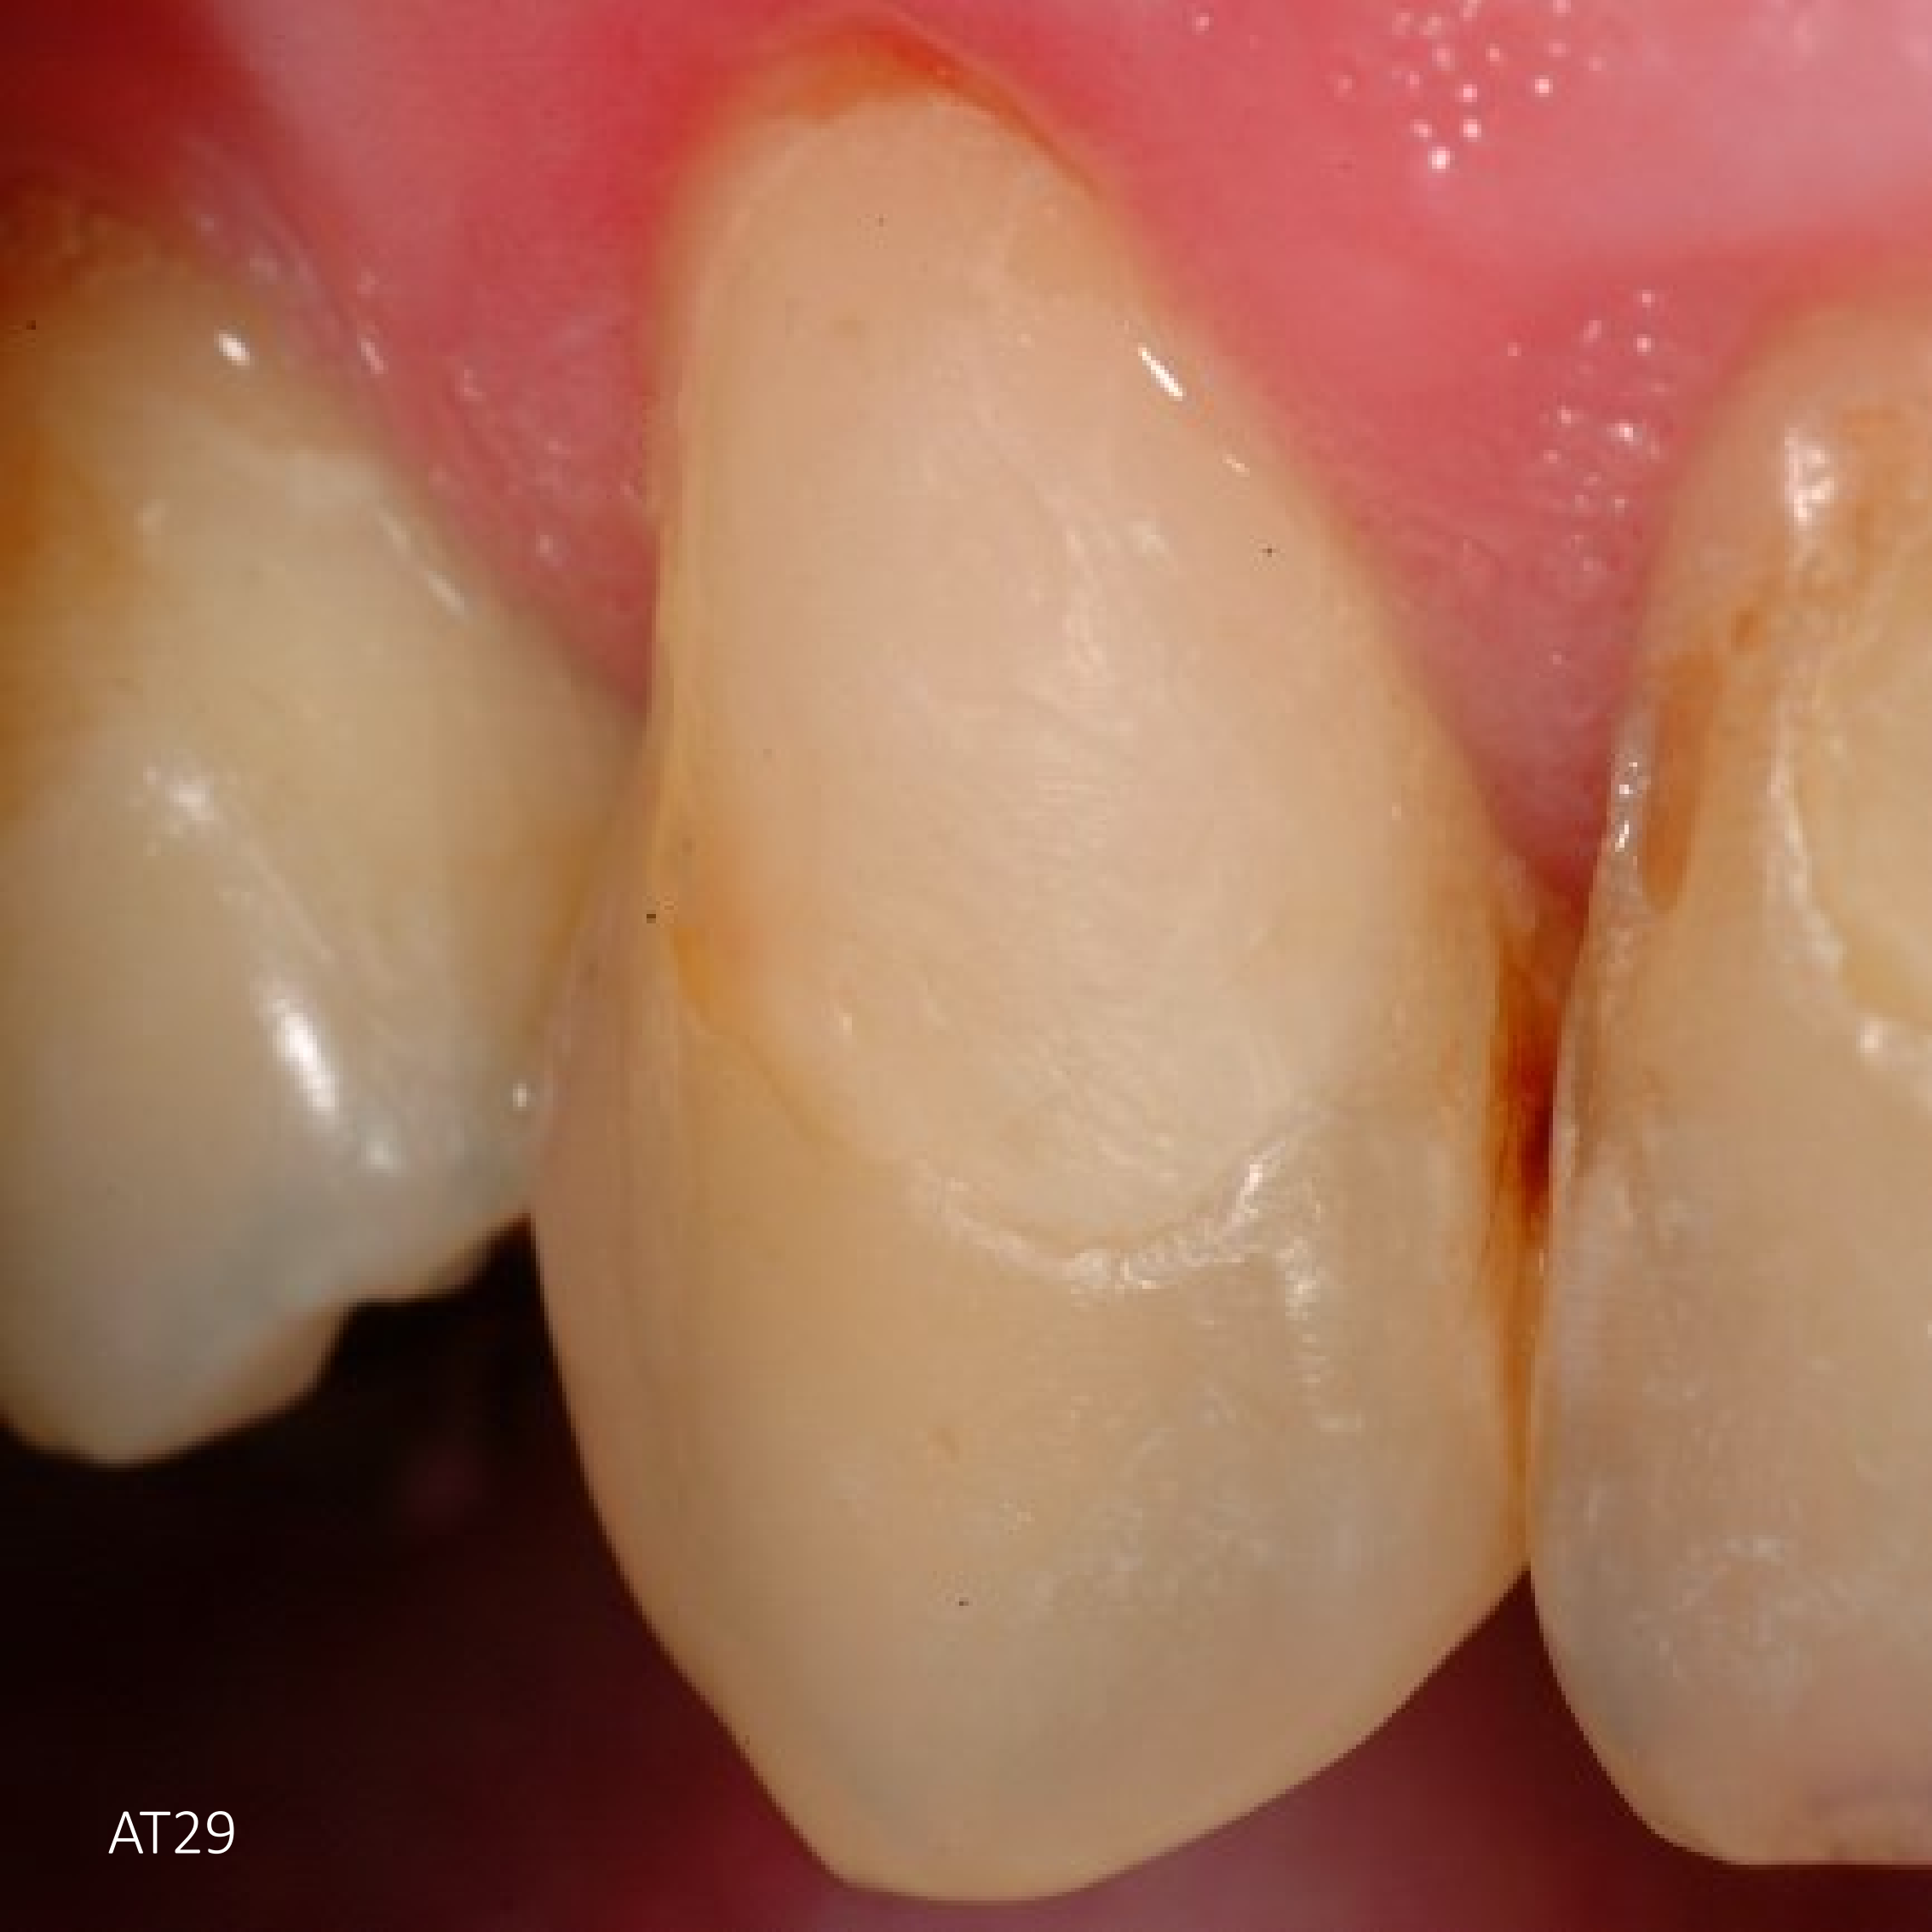

AT29



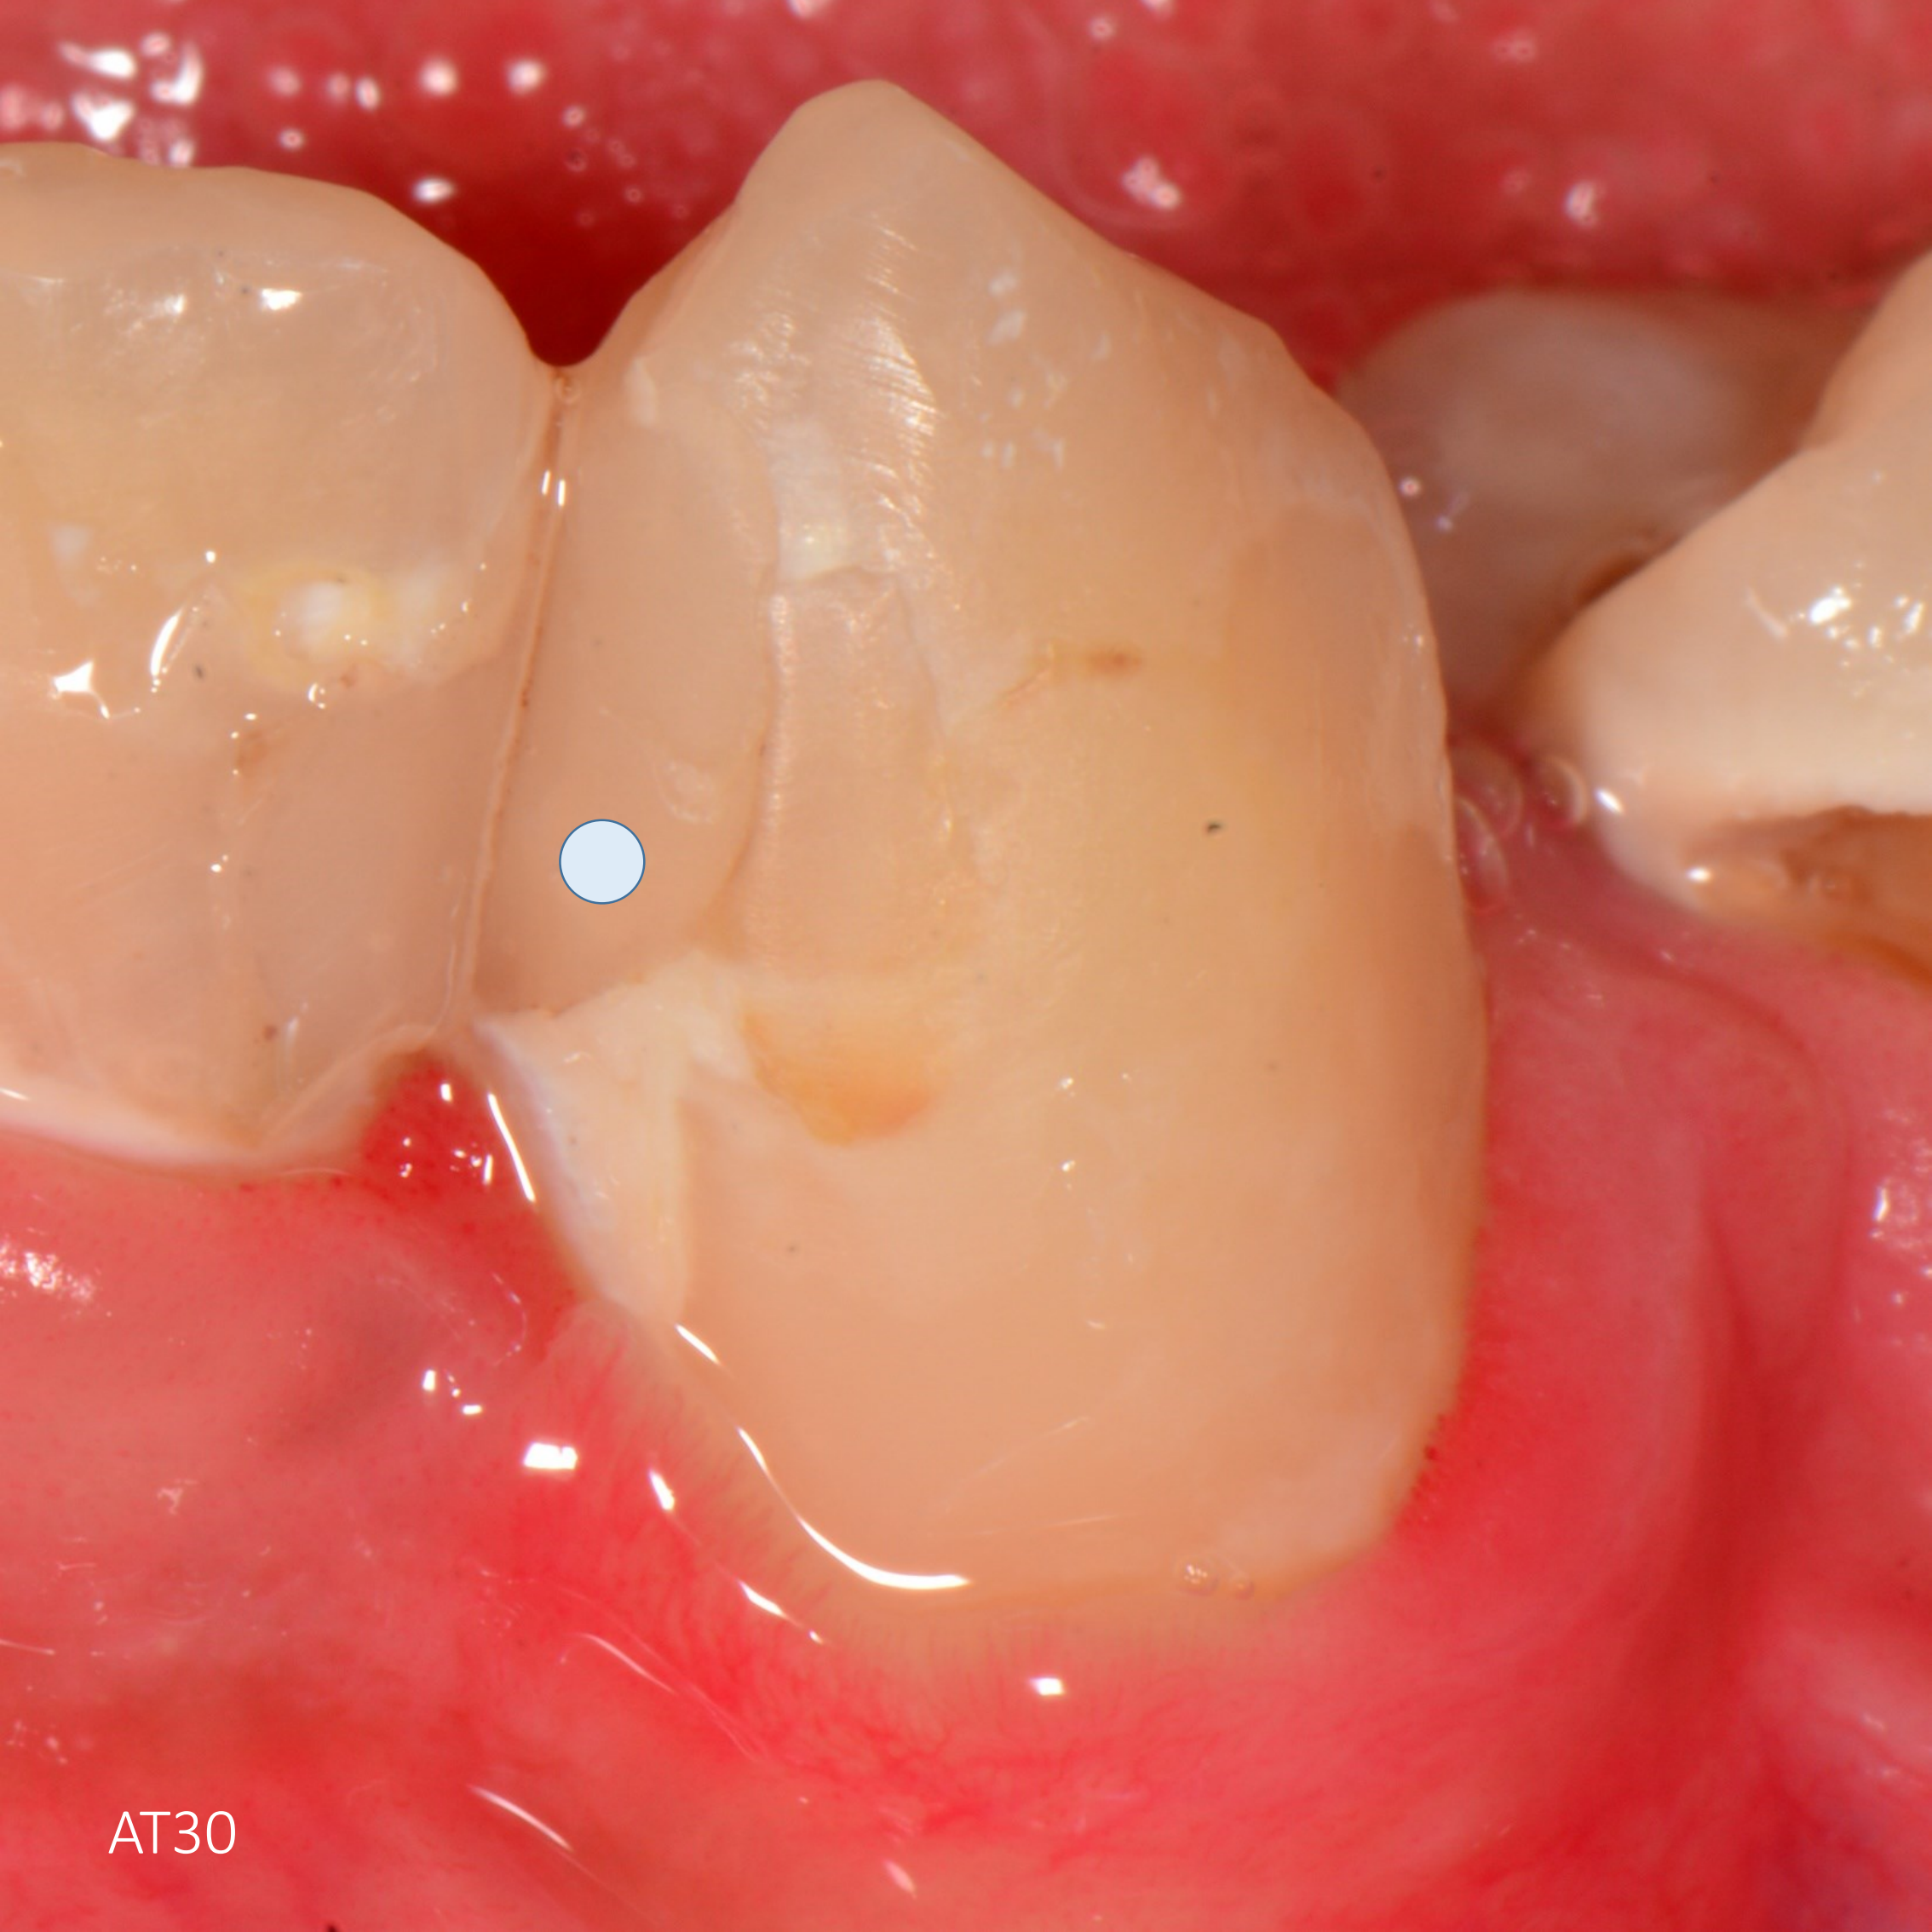

AT30

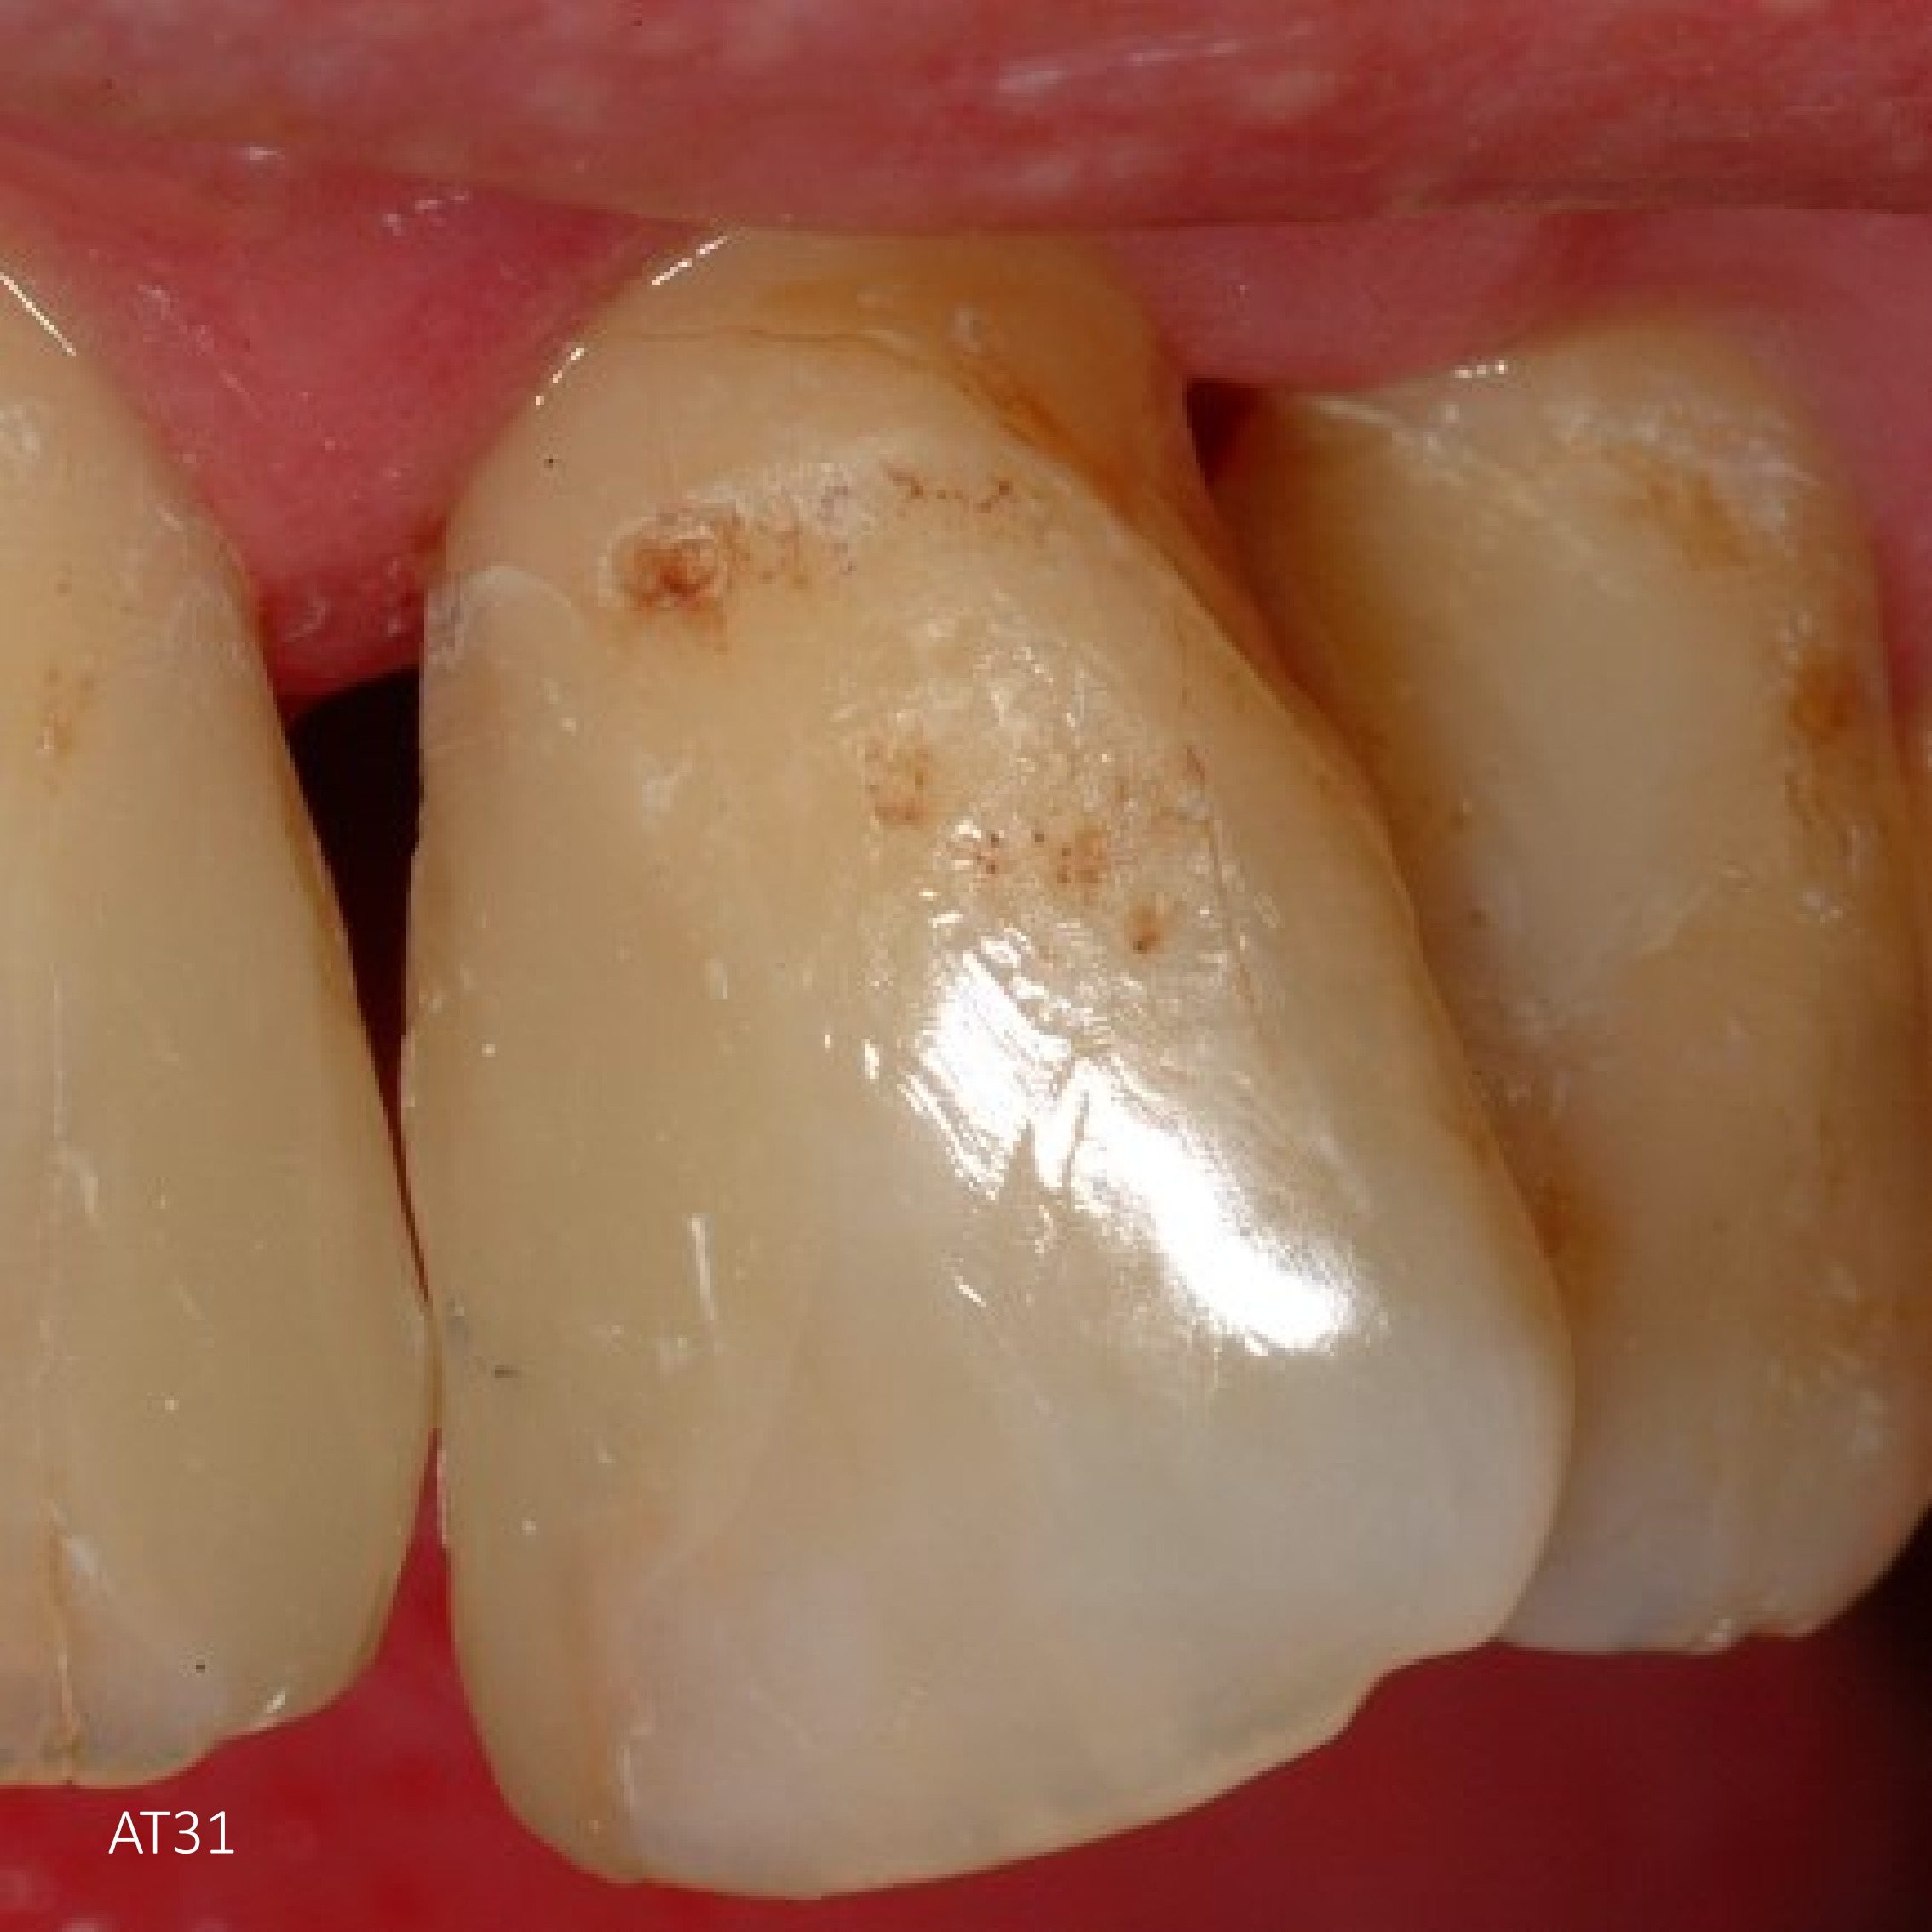

AT31



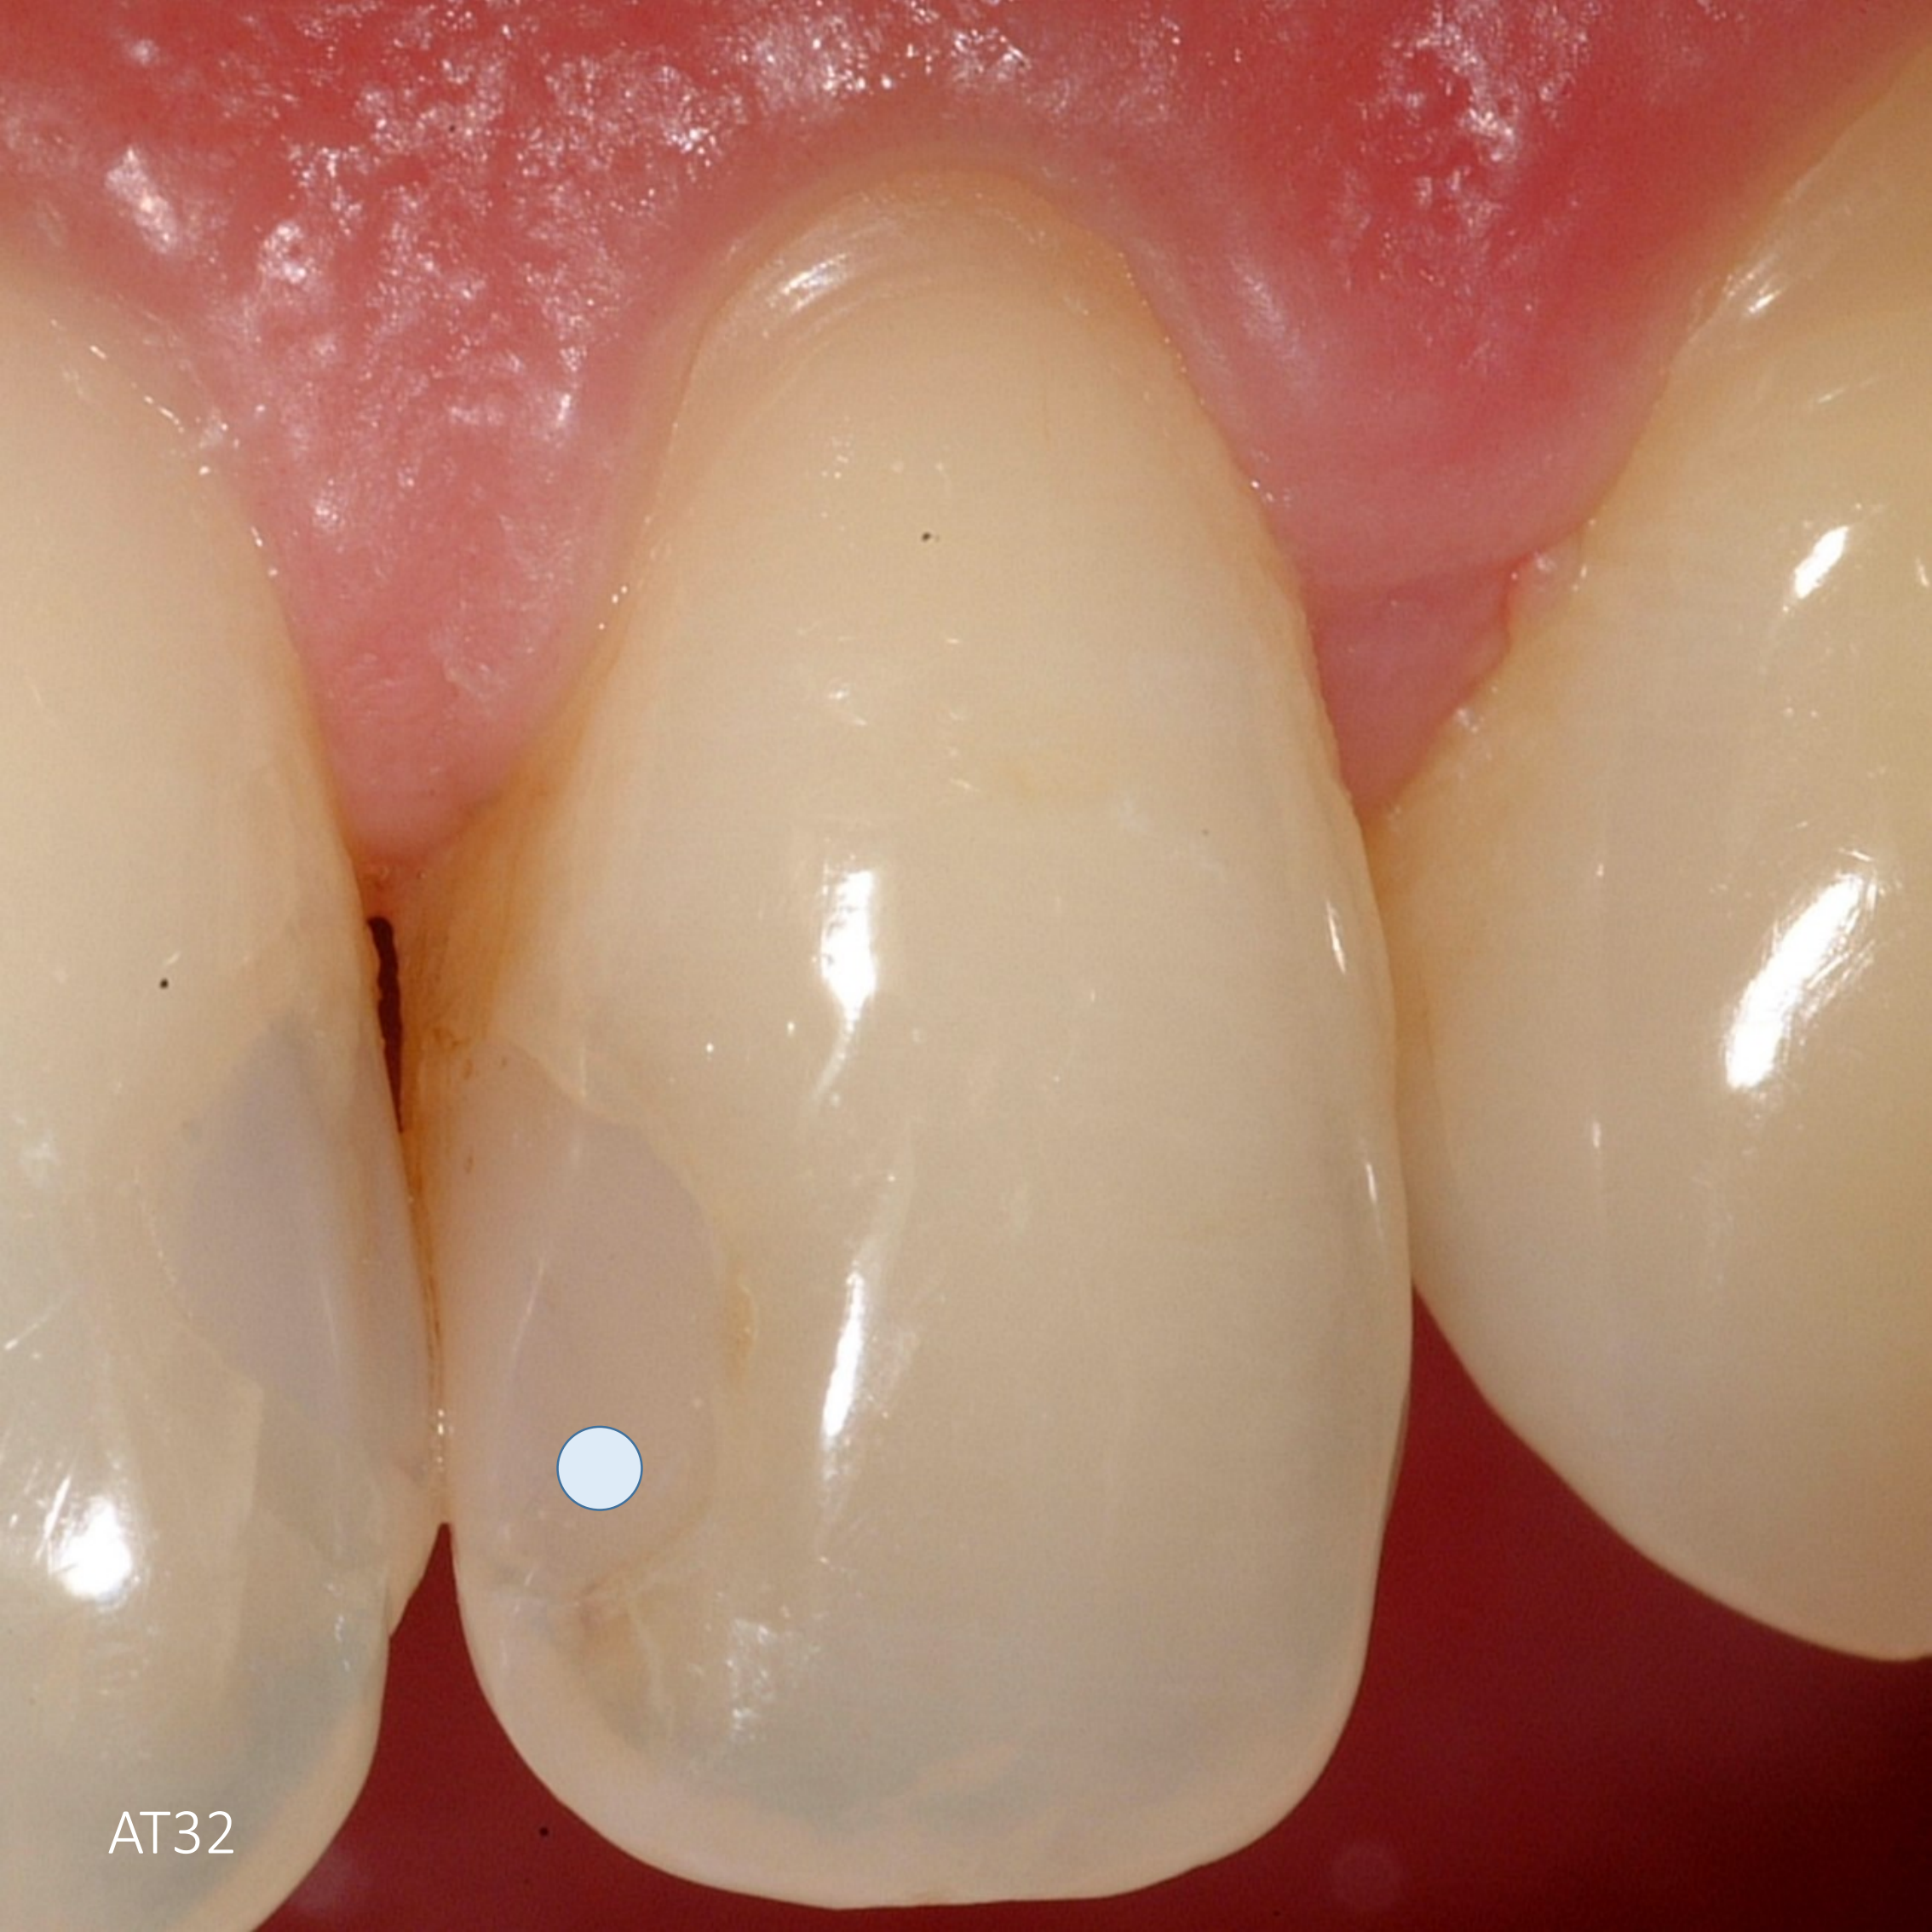

AT32

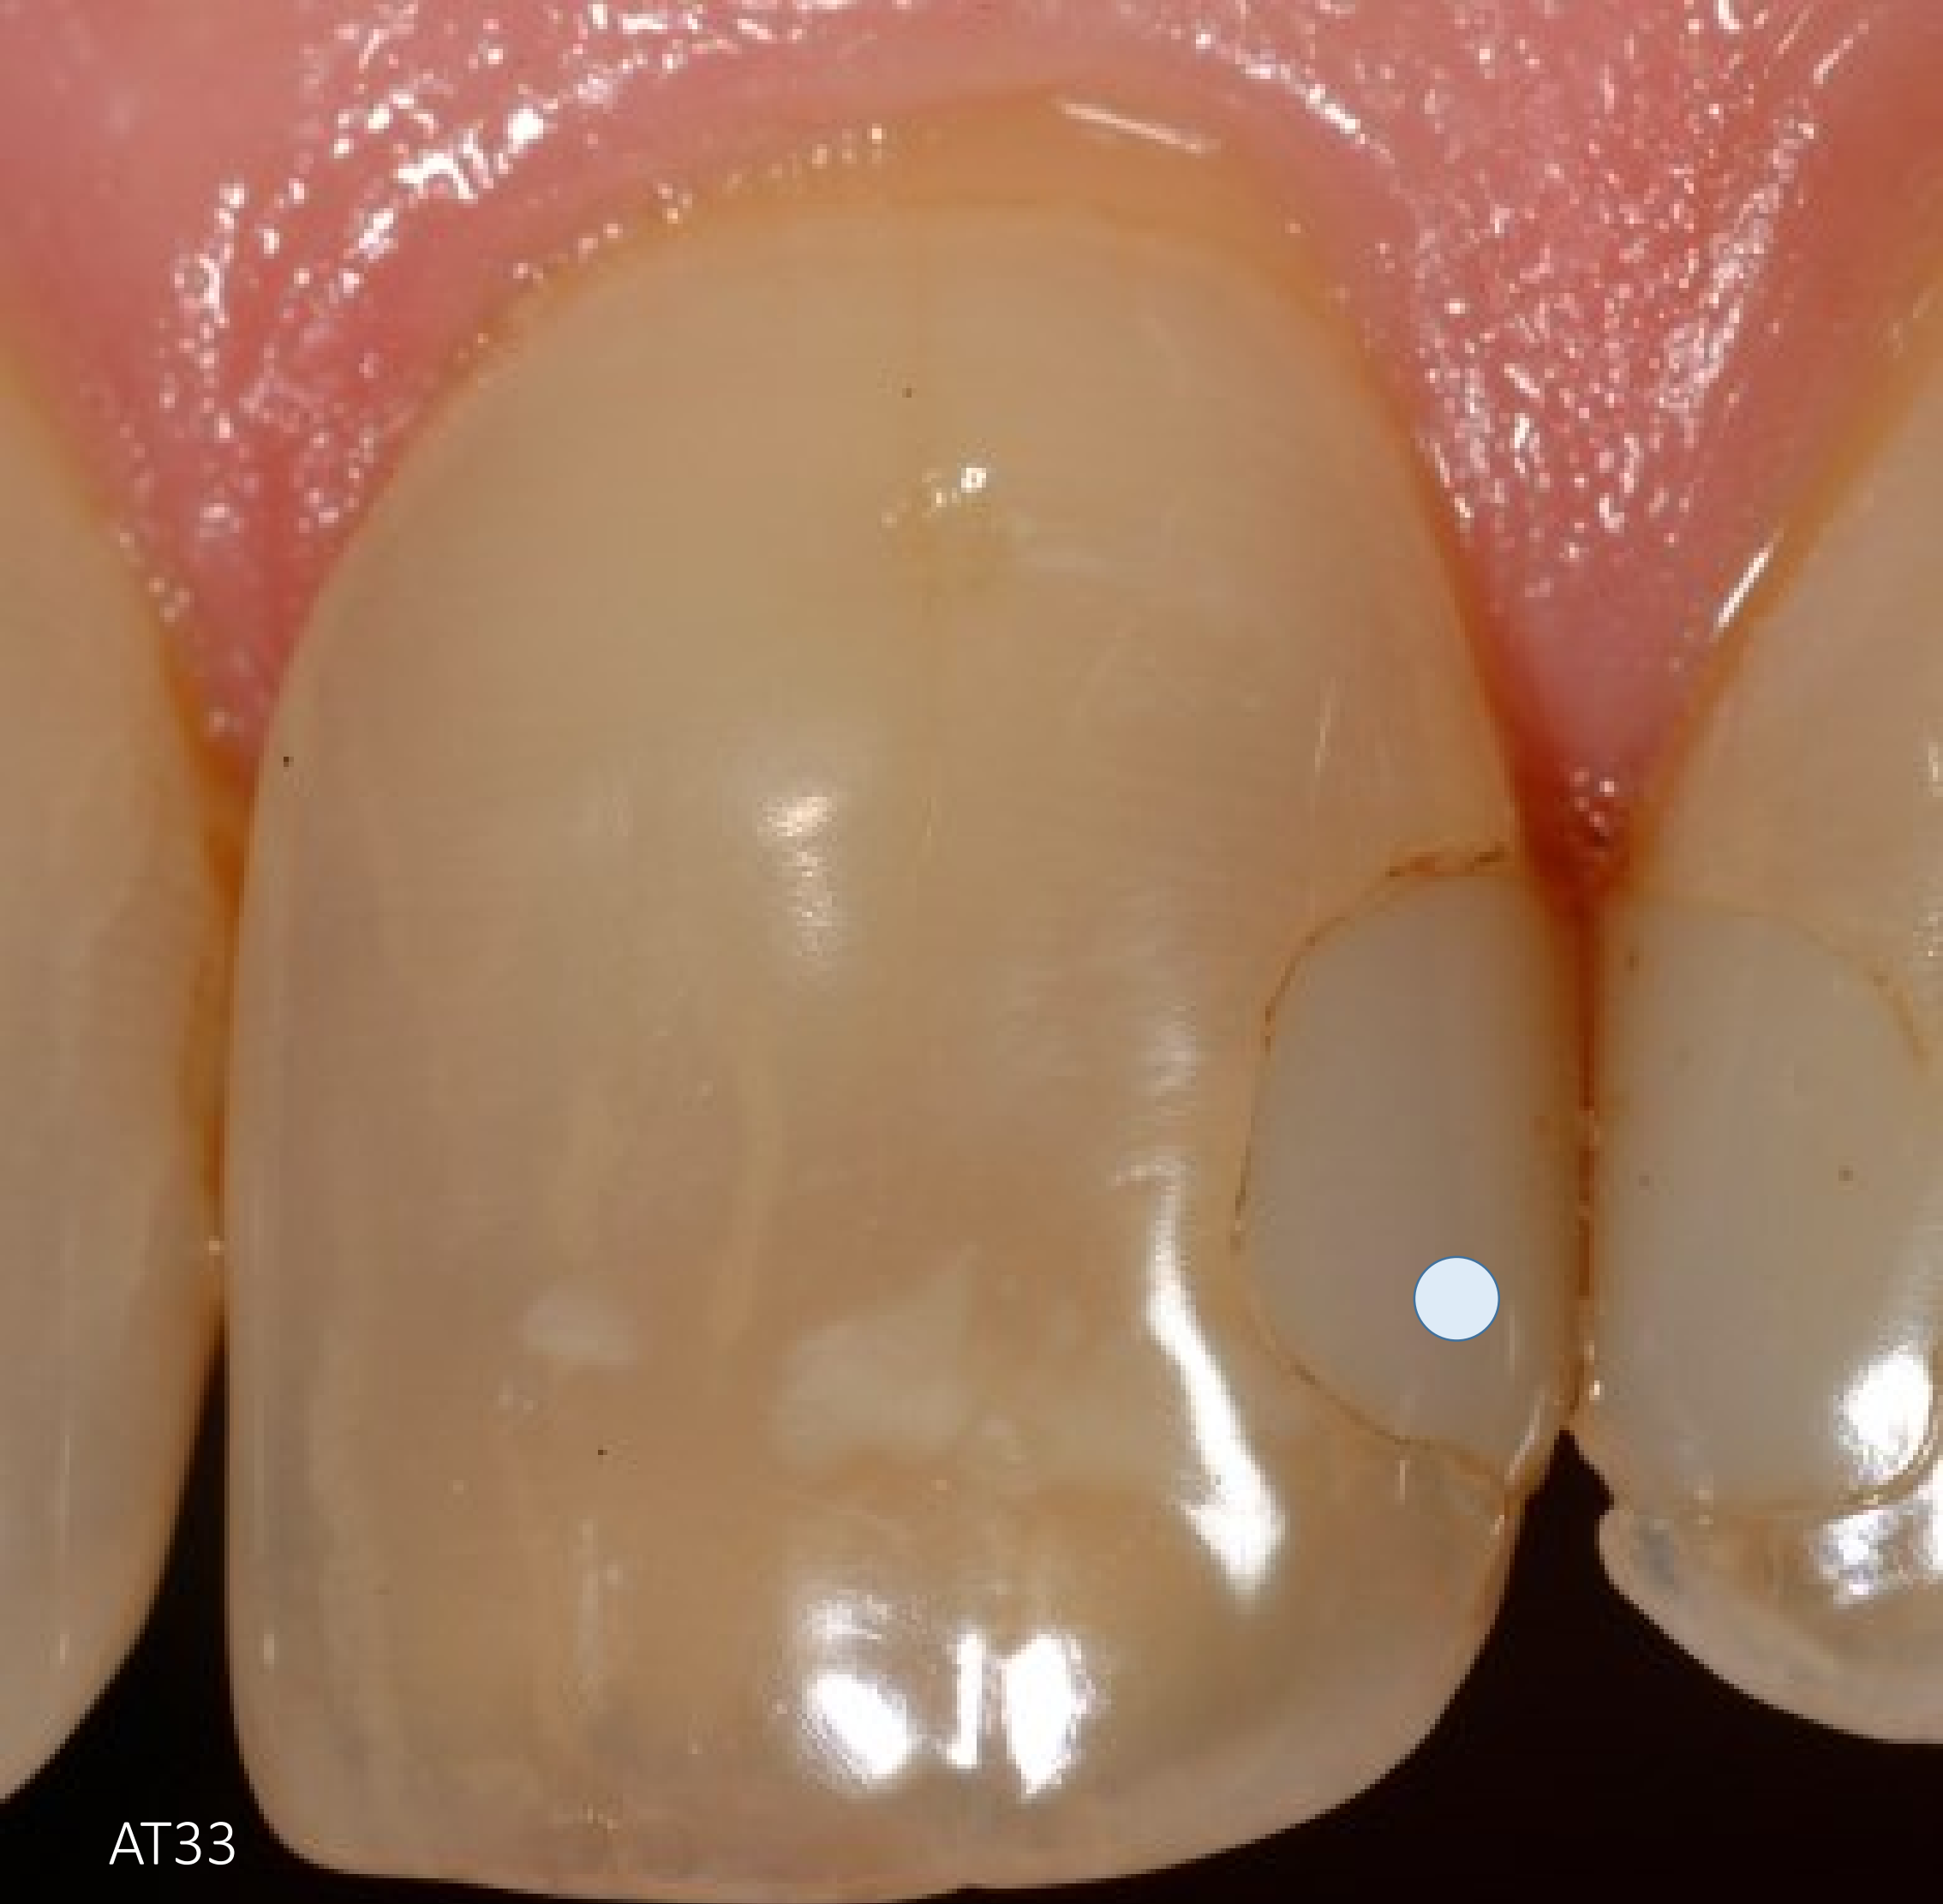

AT33



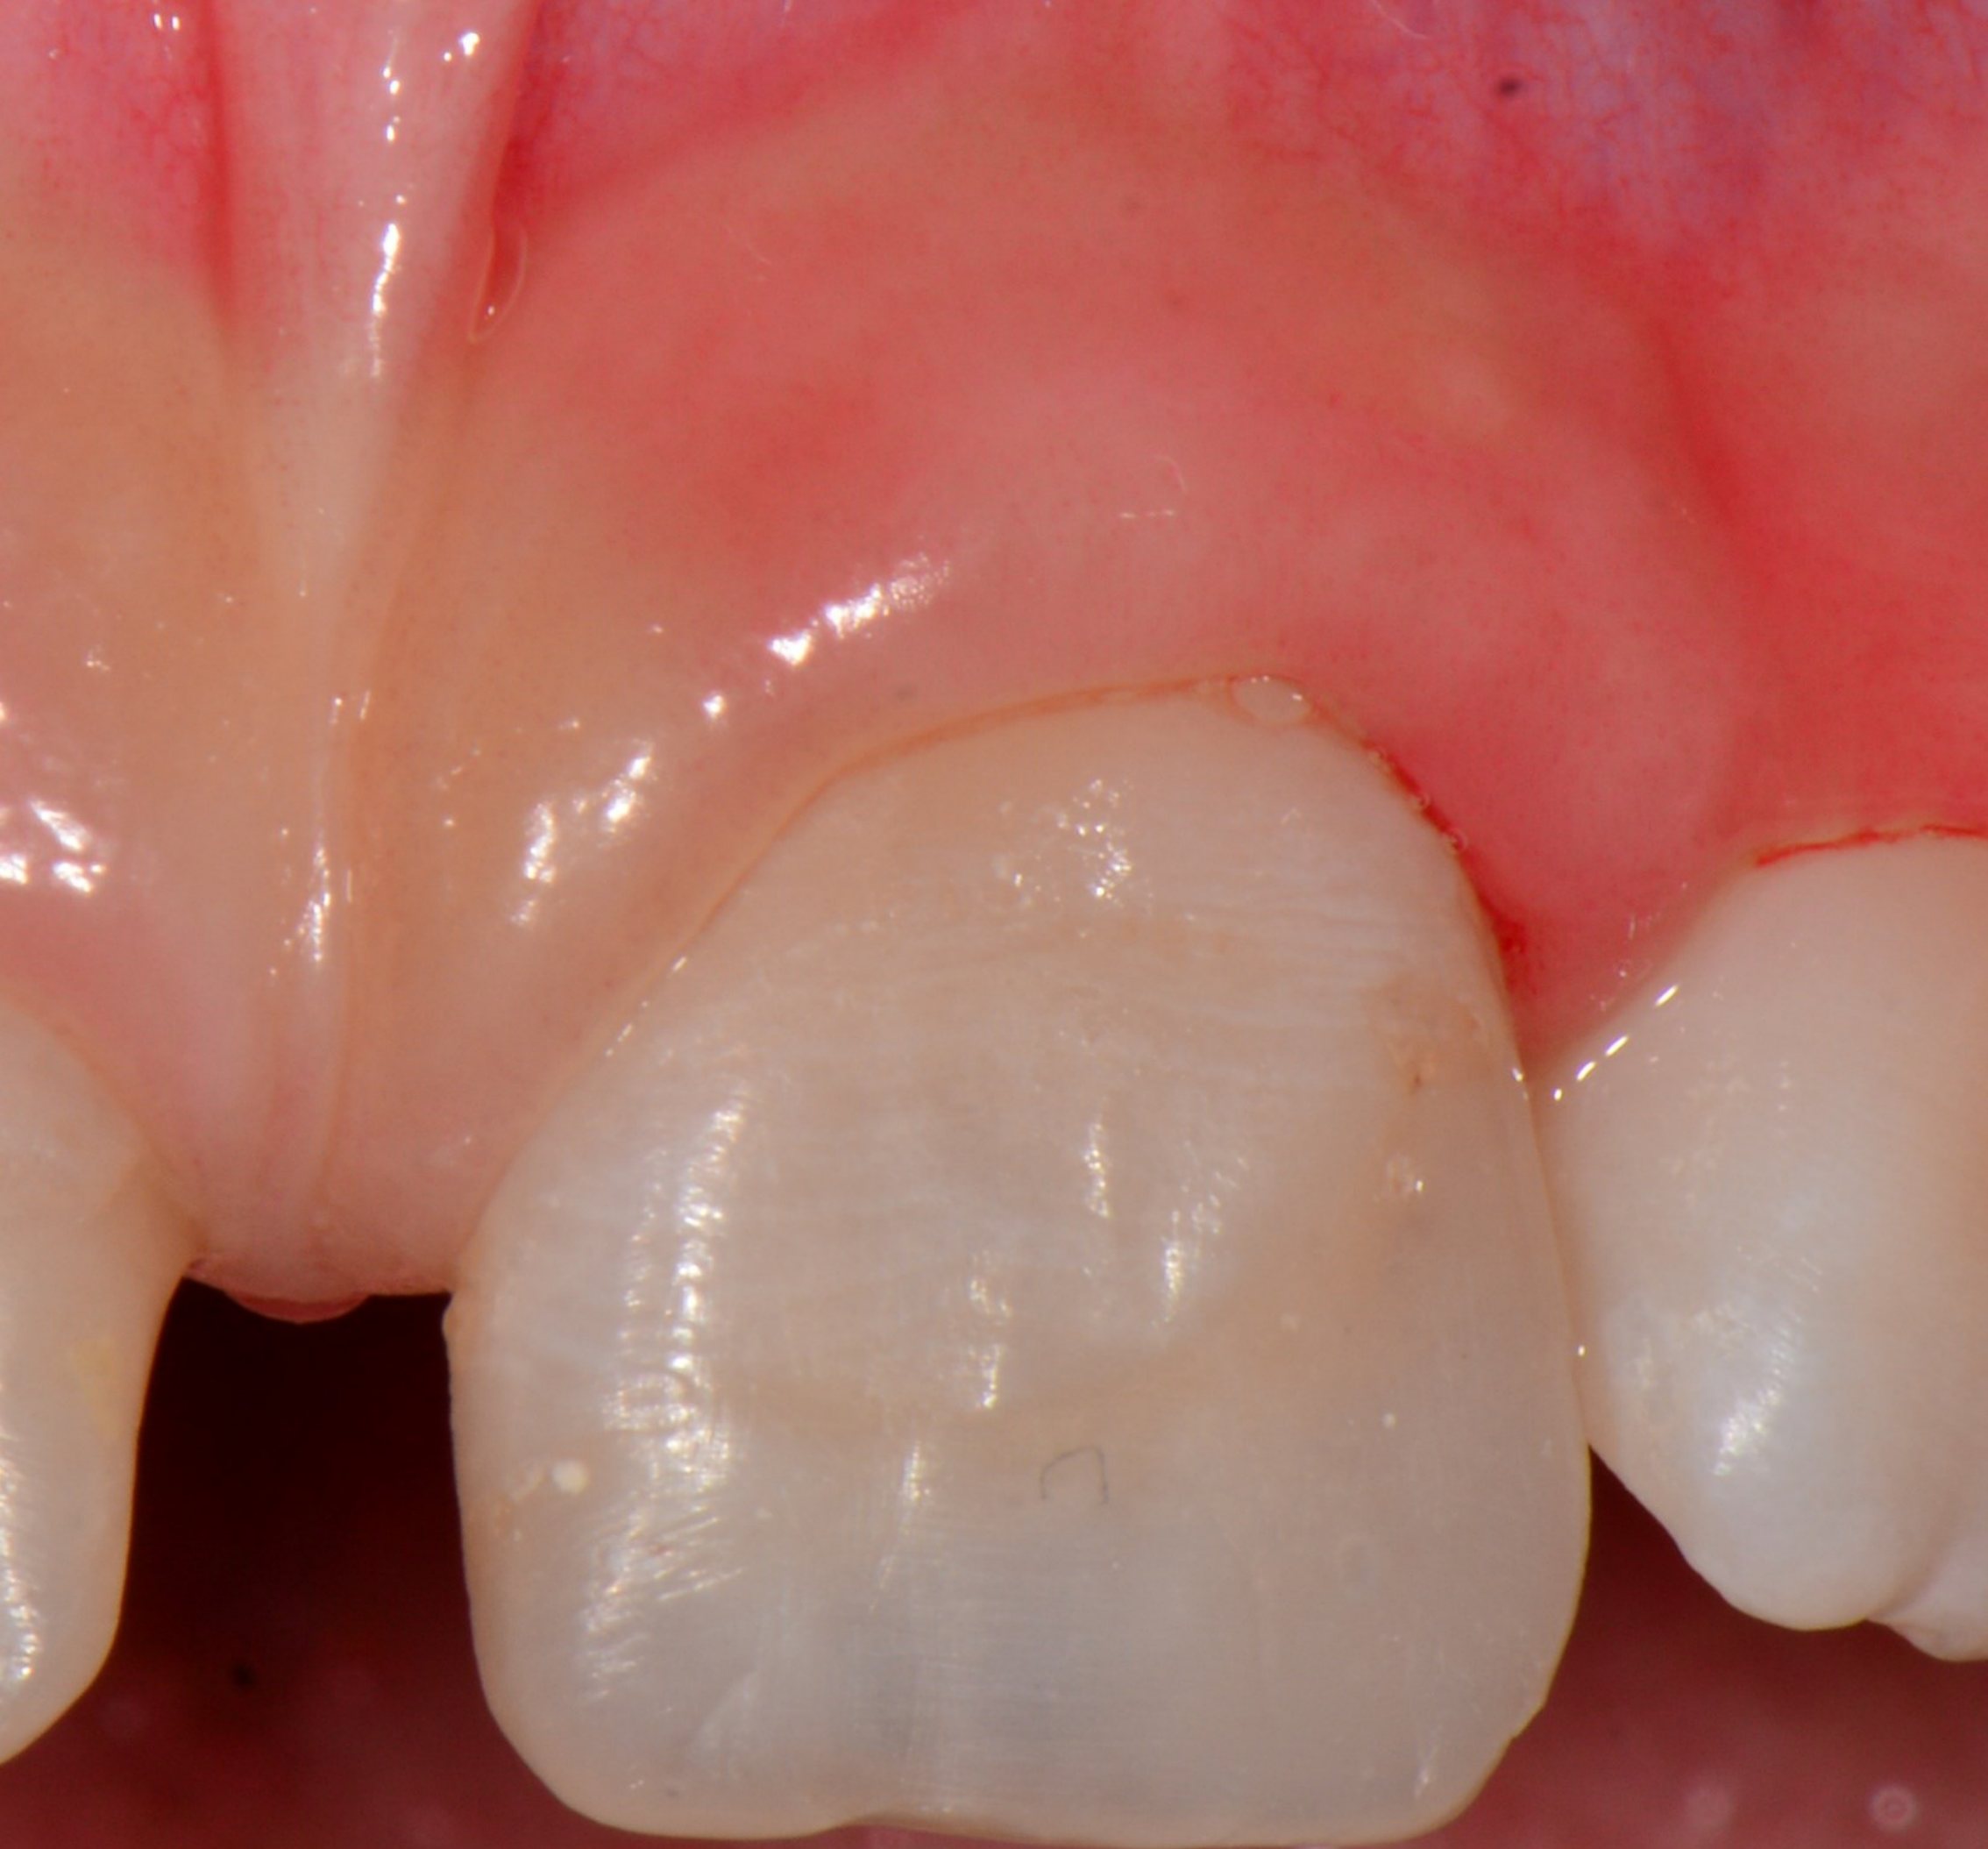

AT34

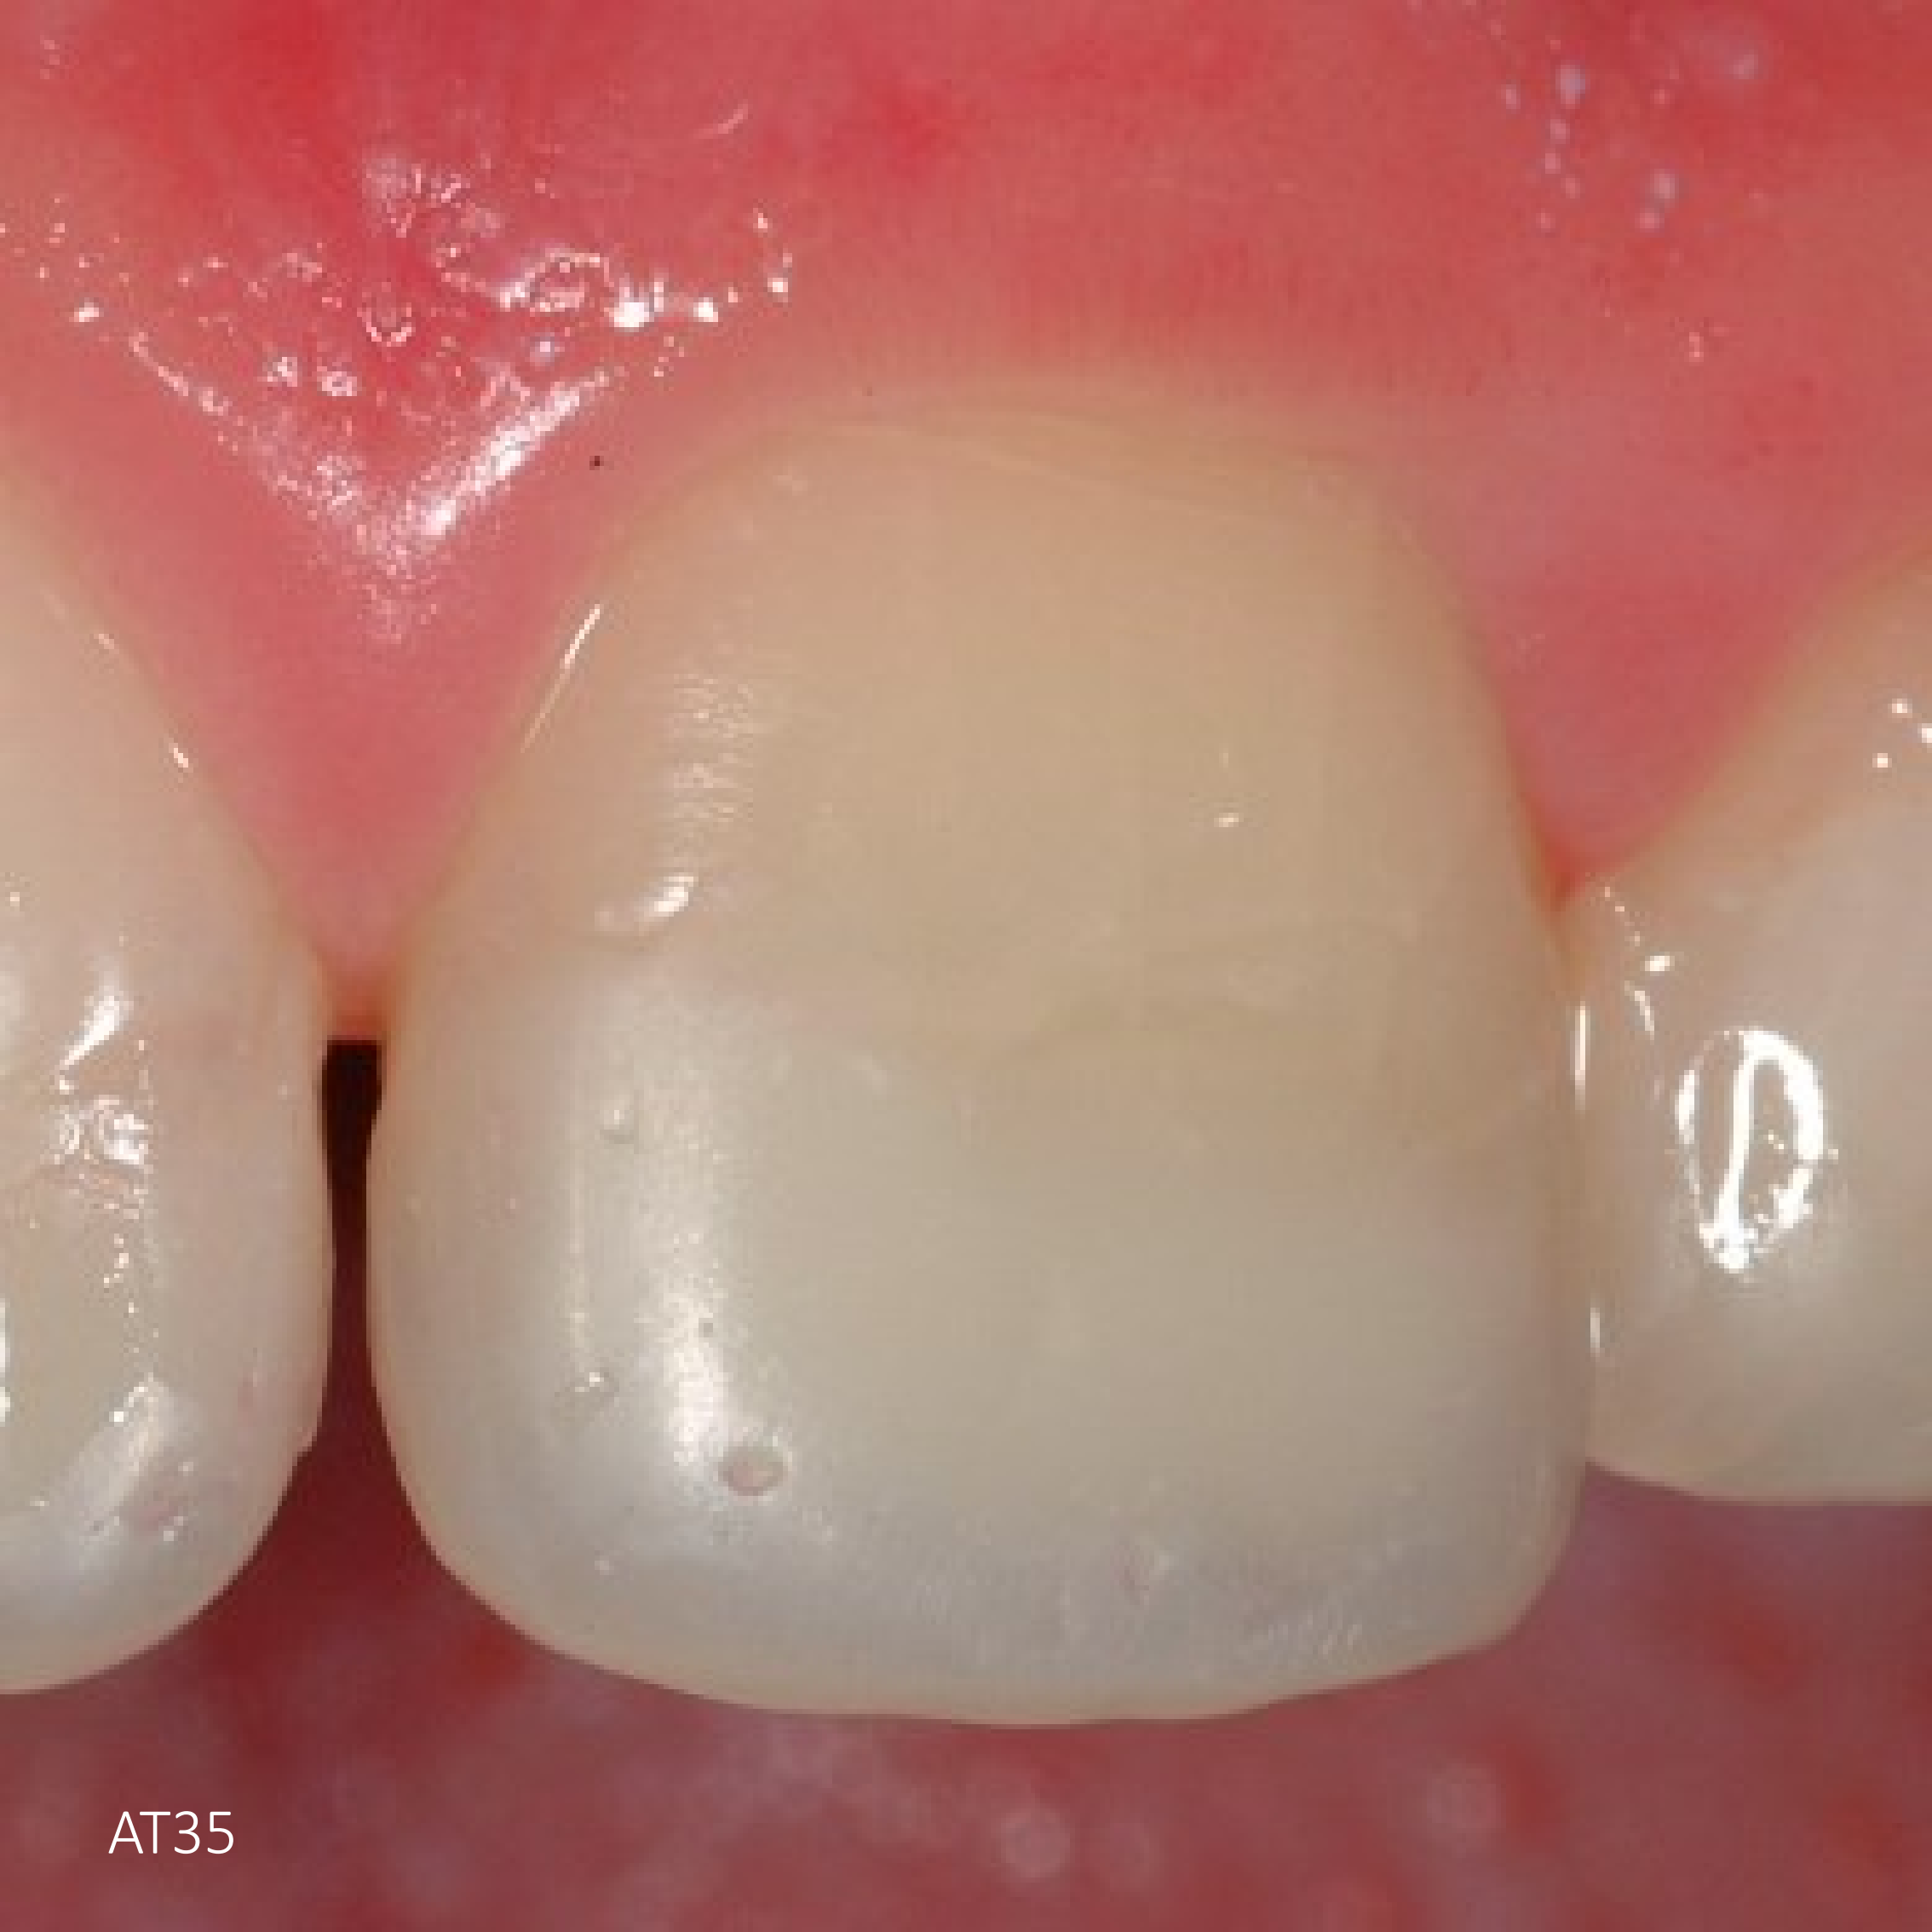

AT35



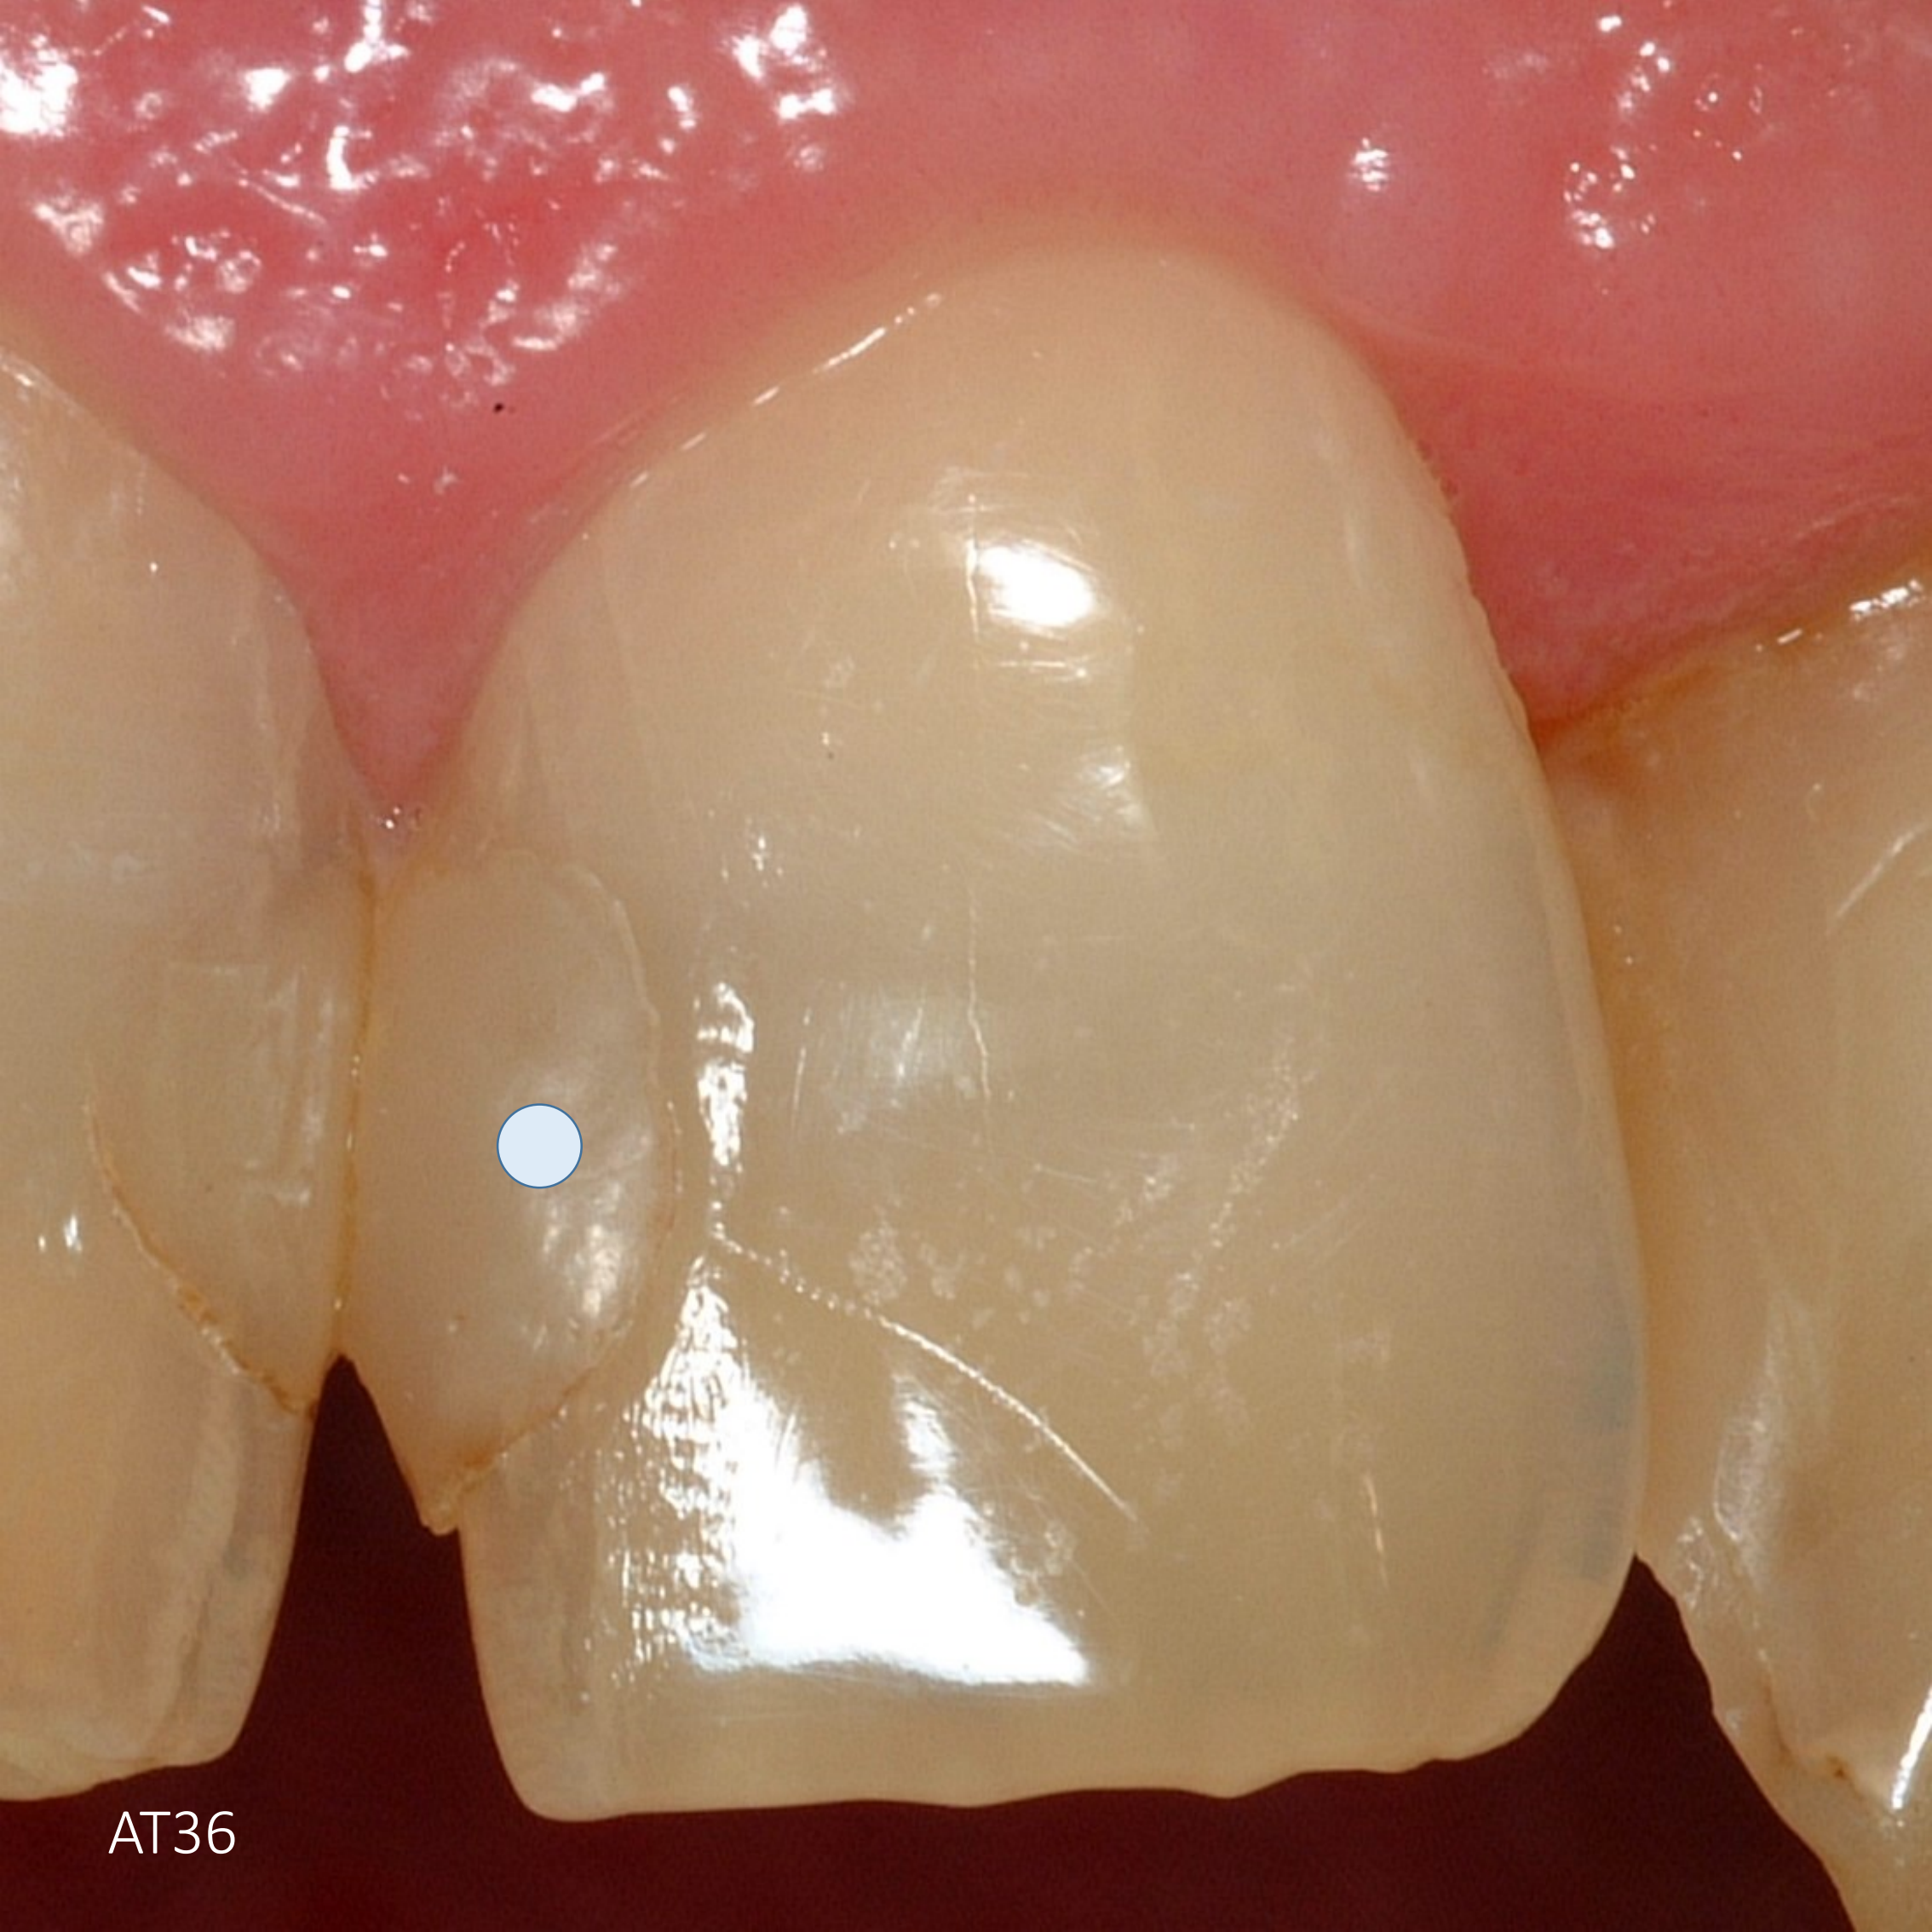

AT36

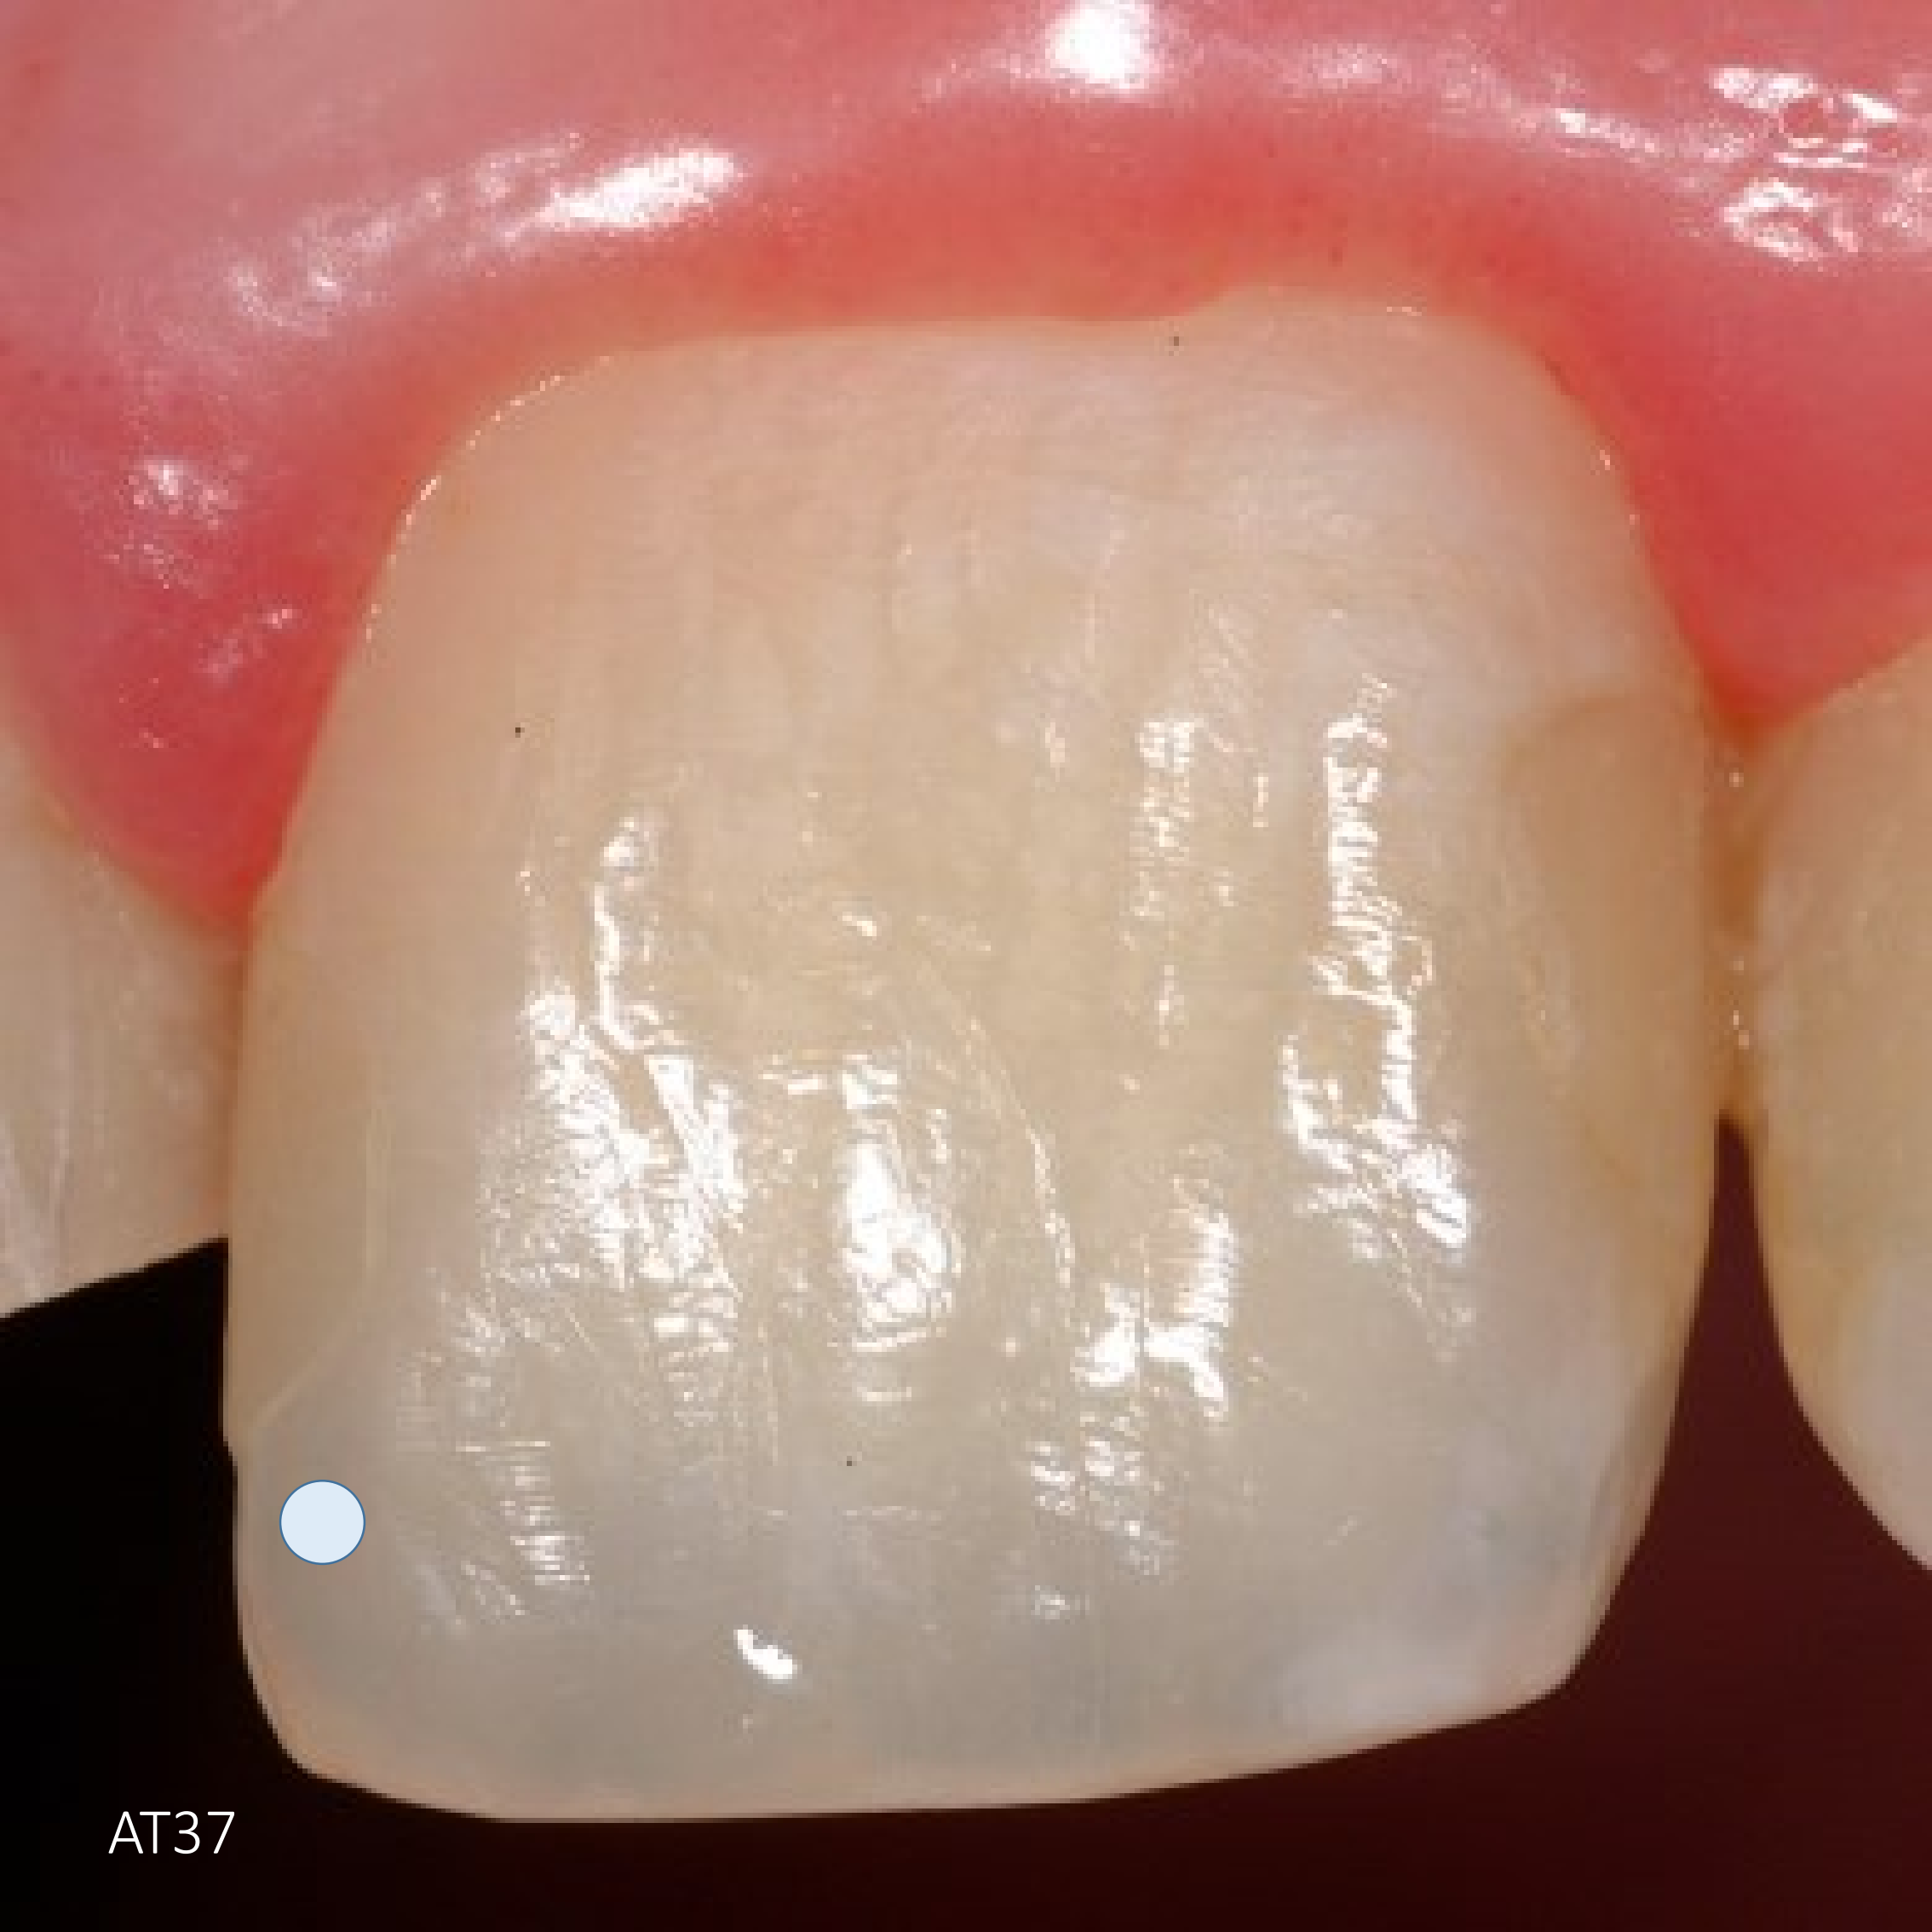

AT37



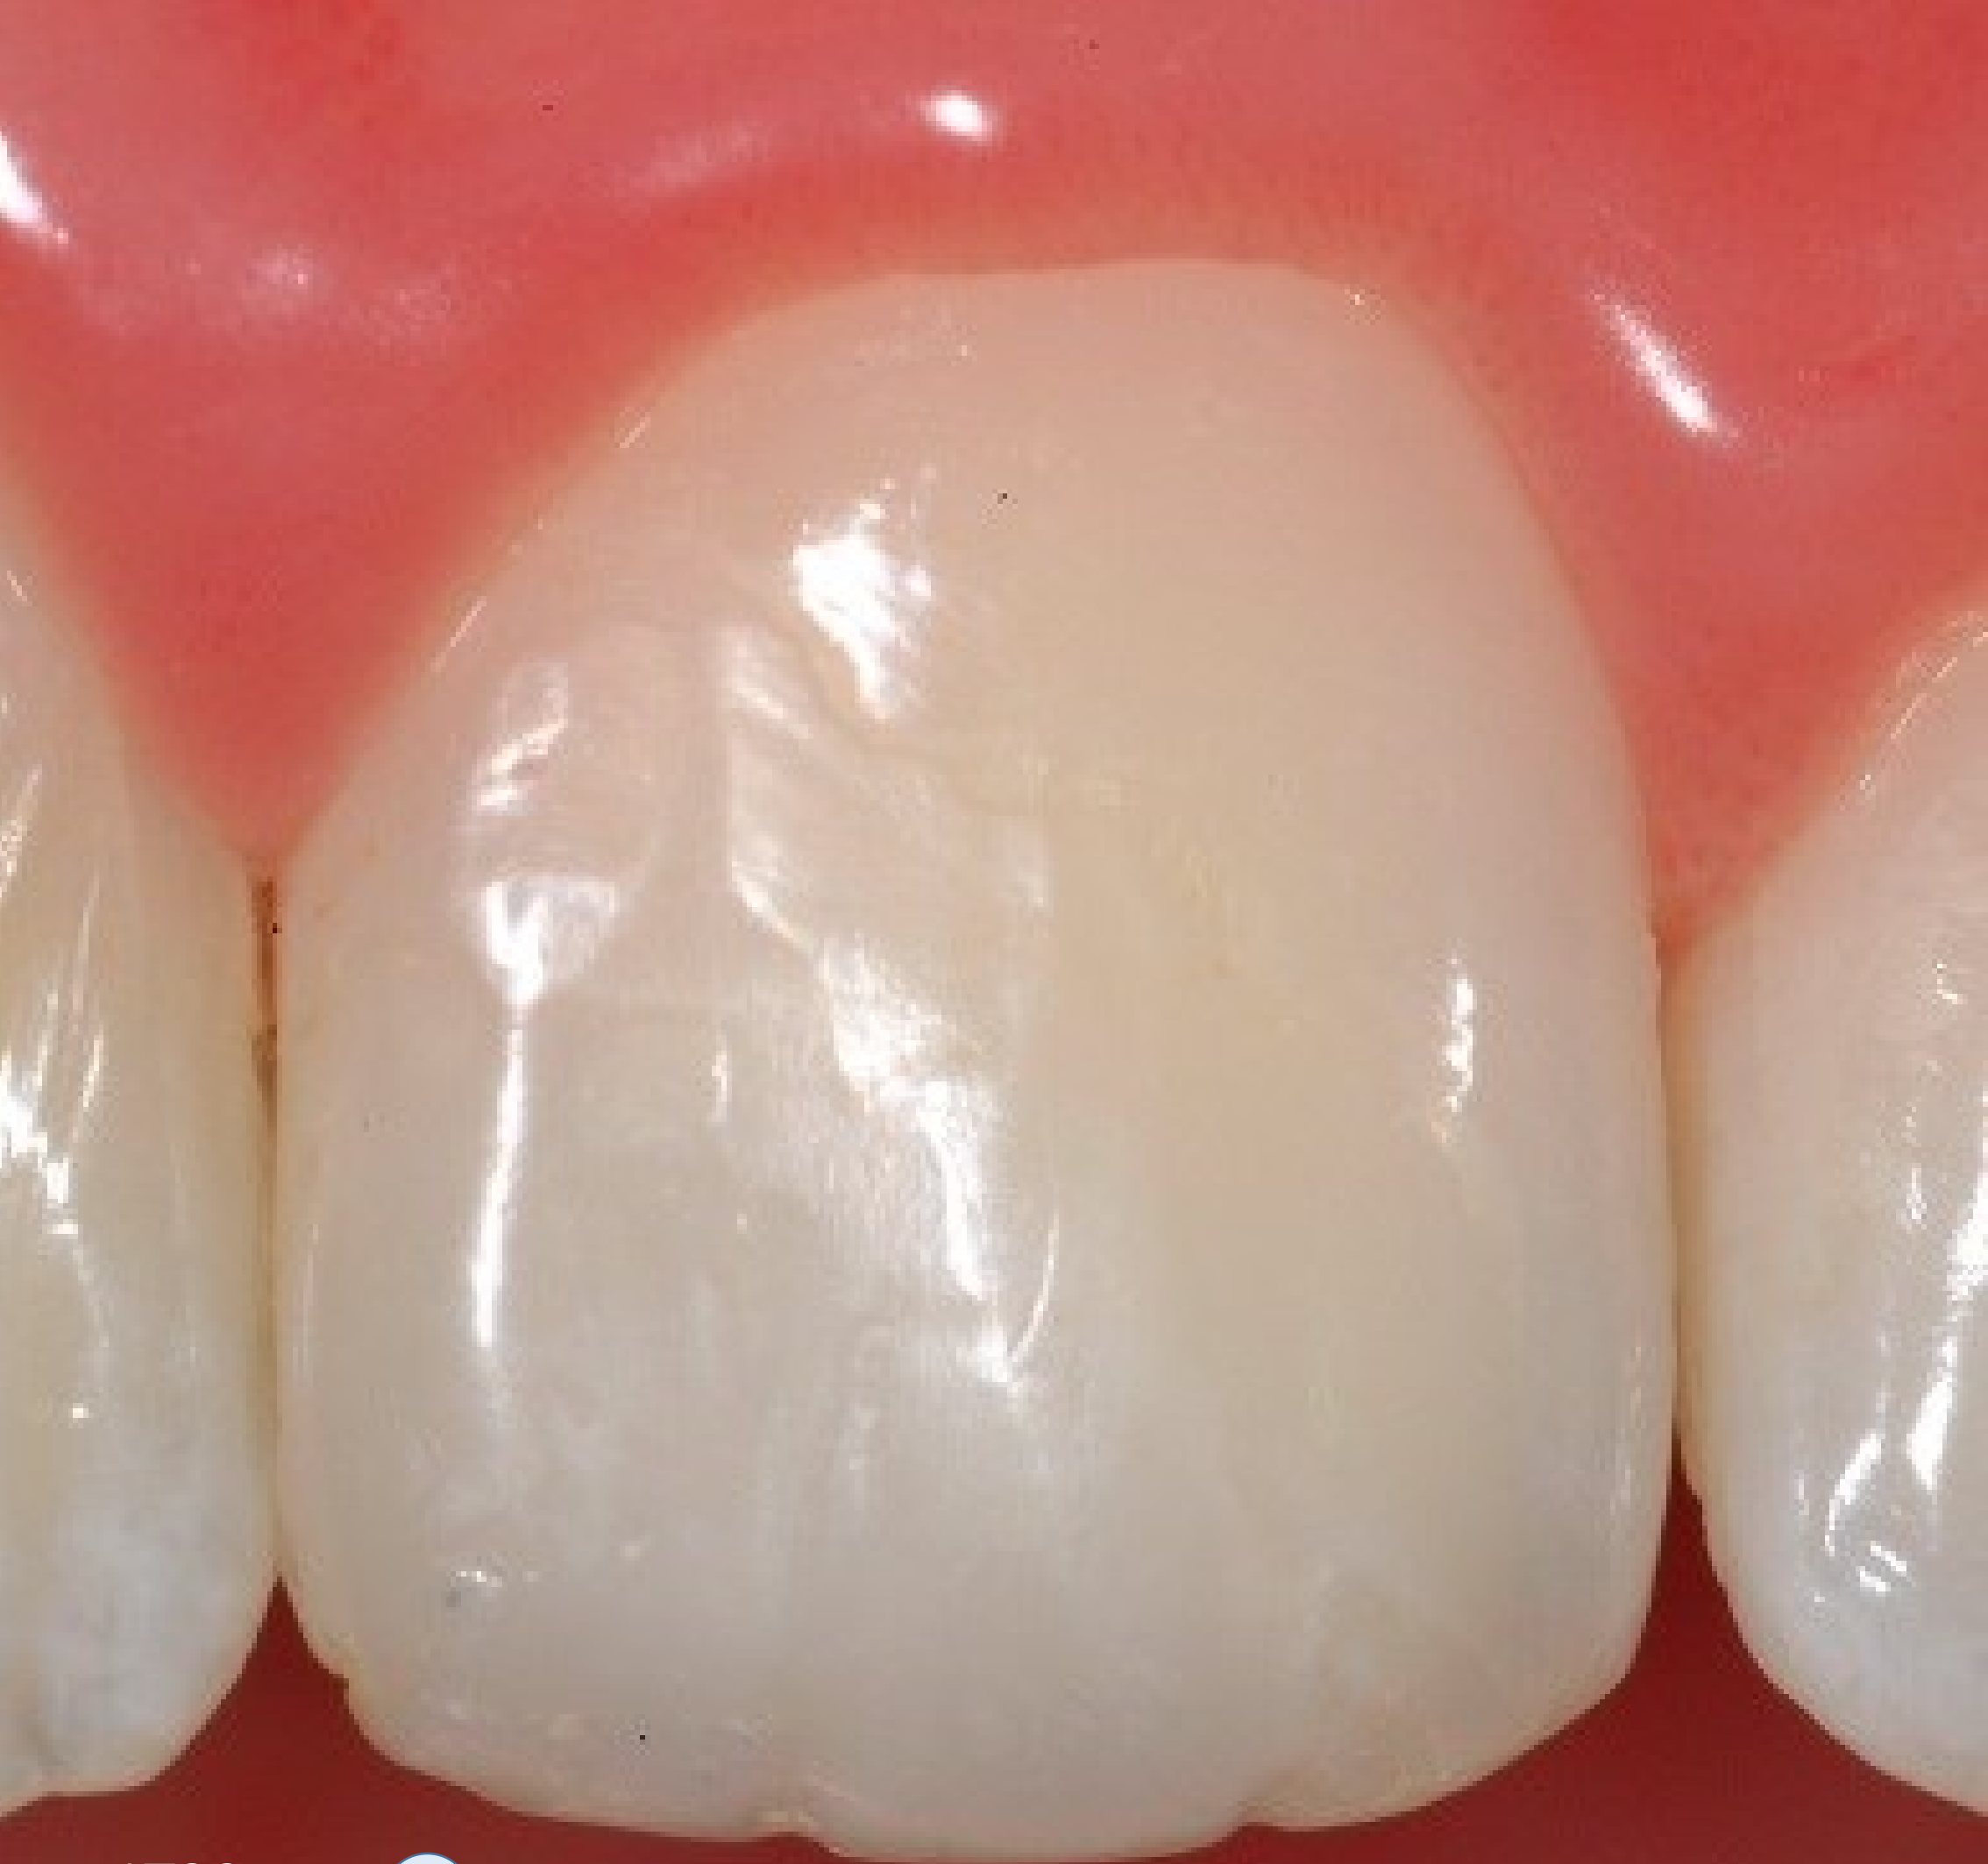

AT39

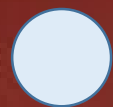

Supplement: MOESM1 [file 784_2022_4771_MOESM1_ESM.pdf]
